# Supplementary material for: JBP485 promotes tear and mucin secretion in ocular surface epithelia
Source: PubMed Central journal article supplement (PMC4440520; doi:10.1038/srep10248), 2015-05-21
Supplement: srep10248-s1.pdf [file srep10248-s1.pdf]

## **Supplementary Information**

### **JBP485 promotes tear and mucin secretion in ocular surface epithelia**

Takahiro Nakamura, Yuiko Hata, Maho Nagata, Norihiko Yokoi, Shumpei Yamaguchi, Taiichi Kaku,  
Shigeru Kinoshita

**Figure S1.**

PCR for Muc1/Muc4/Muc16/Muc5ac and Galectin 3 in rabbit conjunctiva and cornea.

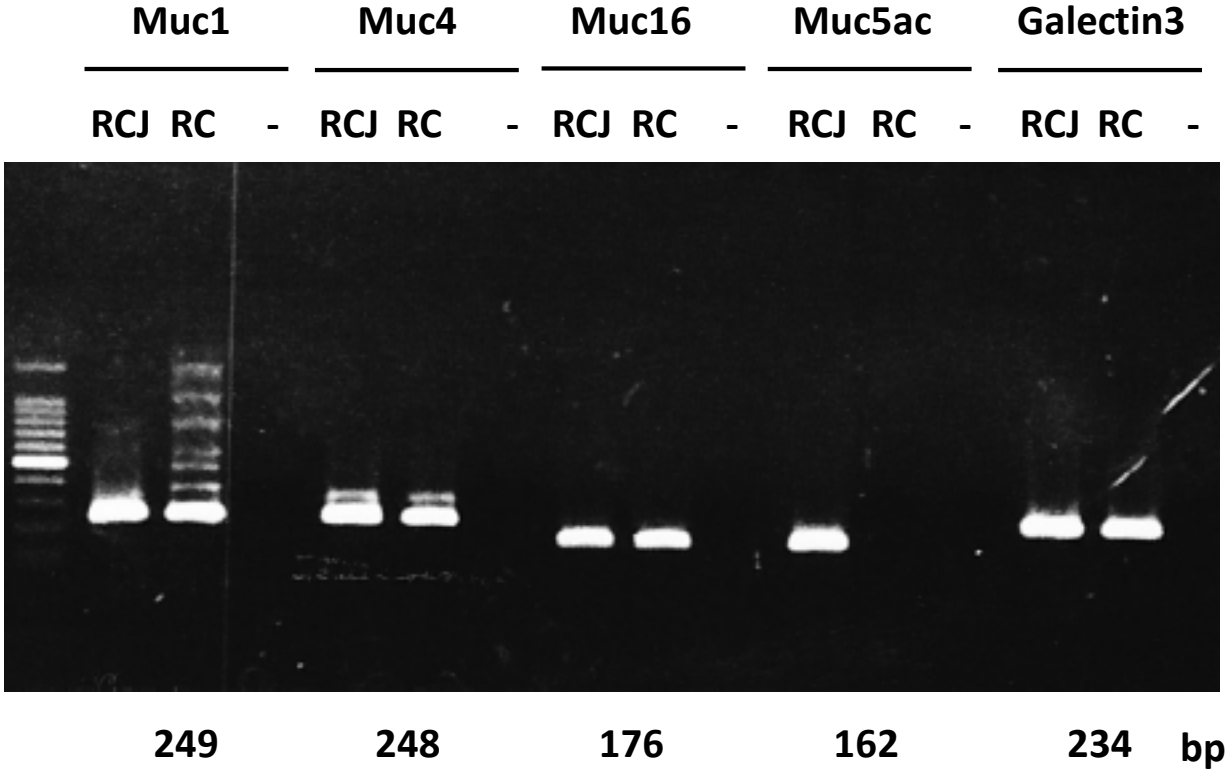

RCJ: Rabbit Conjunctiva  
RC: Rabbit Cornea  
-: Negative control

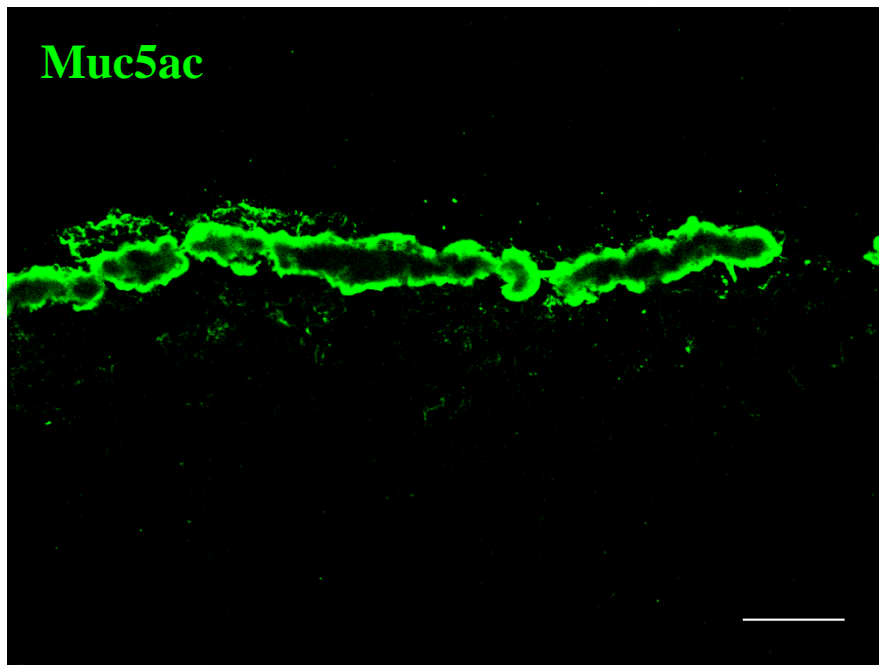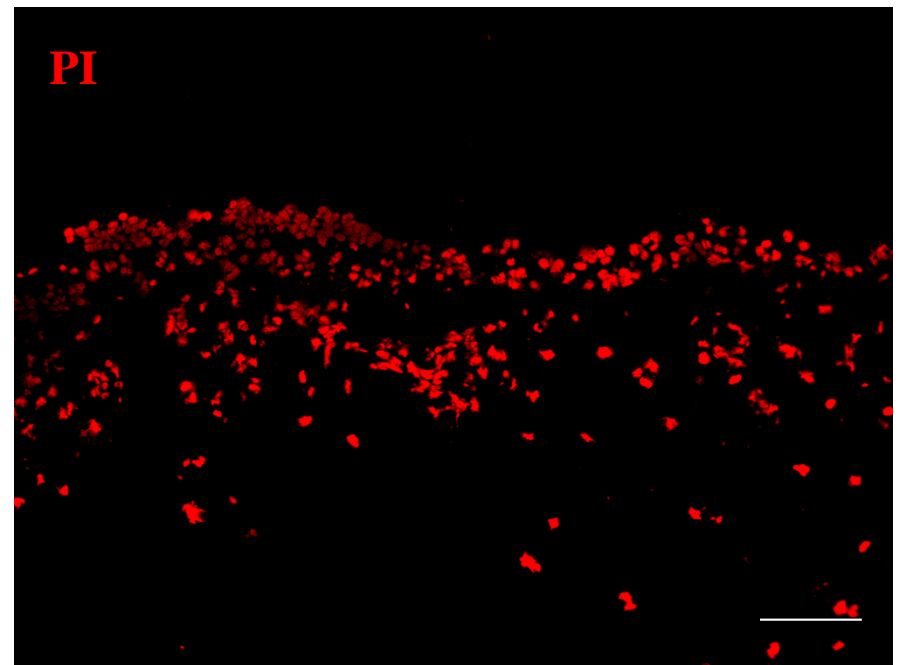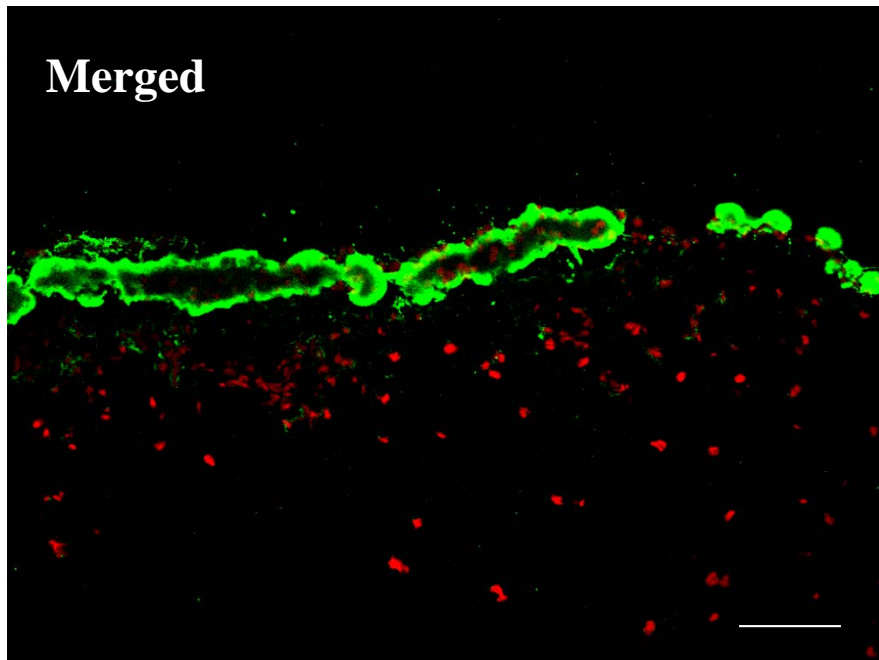

**Figure S2.**

Immunostaining for Muc5ac (green) in rabbit conjunctiva. Nuclei are counterstained with PI (red). Scale bars, 100 $\mu$ m.

Supplemental Table 1. Sequence for PCR

---

|           |   |                        |          |
|-----------|---|------------------------|----------|
| Muc1      | F | GGAATGTTTCGGCACTGATT   |          |
|           | R | GAACTCCAGACTGGGCAGAG   | size 249 |
| Muc4      | F | GTGCCTTTCTCTGGAACAGC   |          |
|           | R | CACCCTTGAGATGGGGTAGA   | size 248 |
| Muc16     | F | TGCCAAATACCAAGTGGAAACA |          |
|           | R | GTCTCCGAGCCAAAGATGAG   | size 176 |
| Galectin3 | F | ACTTTAACCCCGCTTCAAT    |          |
|           | R | TTCCCAGCTTGTTGATTTCC   | size 234 |
| Muc5ac    | F | CCCCAACGTCAAGAACAAC    |          |
|           | R | TCAAACAGGCAGTTCGAGTG   | size 162 |

---

F:Forward, R: Reverse

## Supplemental Information 1.

CLUSTAL 2.1 multiple sequence alignment

### Muc1

```
human      CGCTCCACCTCTCAAGCAGCCAGCGCCTGCCTGAATCTGTTCTGCCCCCTCCCACCCAT
rabbit     -----GCCACCAGCCCCG-----
```

\*\*..\*\*\*\*\* \*\*

```
human      TTCACCACCACCATGACACCGGGCACCCAGTCTCCTTTCTTCTGCTGCTGCTCCTCACA
rabbit     -----TCCACGAAGTCACC-----
```

:\*\*\*\* \*:\*\*\*

```
human      GTGCTTACAGTTGTTACGGTTCTGGTCATGCAAGCTCTACCCAGGTGGAGAAAAGGAG
rabbit     -----TCTGCCCCGG-----
```

\*\*\*,\*\*\*, \*

```
human      ACTTCGGCTACCCAGAGAAGTTCAGTGCCCAGCTCTACTGAGAAGAATGCTGTGAGTATG
rabbit     -----
```

```
human      ACCAGCAGCGTACTCTCCAGCCACAGCCCCGGTTCAGGCTCCTCCACCACTCAGGGACAG
rabbit     -----CCACCAGCCCCACGTGGTCTCAGCCACCAGCCCCGTCCAC
```

\*..\*\*\*\*\*. \*. \* \*\*..\*\*\*\*\* \* \* \*\*

```
human      GATGTCACCTCTGCCCCGGCCACGGAACCAGTTTTCAGGTTTTCAGTCCACCTGGGGACAG
rabbit     GAAGTCACCTCTGCCCCAGCCACCAGCCCTGCATCAGACTTGGCCACCAGCCCTGTCCAT
```

\*\*..\*\*\*\*\* \*\*\*\*\*.\*\*\*\*\* ..\*\*..\*\*..\*\*..\* ..\*\* ..\*\* \* ..\*\*

```
human      GATGTCACCTCGGTCCCAGTCACCAGGCCAGCCCTGGG-----CTCCACCACCCCGCCA
rabbit     GAAGTCACCTCTGCCCCTGCCACCAGCCCCACCCACGTCGGTCTCAGCCACCTCCCCC
```

\*\*..\*\*\*\*\* \* \*\*..\* \*\*\*\*\* \*\*..\*\* ..\*\* ..\*\* ..\*\* \* \*\*..

```
human      GCCCAGATGTCACCTCAGCCCCGGACAACAAGCCAGCCCCGGGCTCCACCGCCCCCCA
rabbit     GTTACGAAGTCACCTCGGCCCGGCCACCAGCCCCACGTCGGTCTCAGATACCAGCCCC
```

\* \*\*\*\*\*:\*\*\*\*\*.\*\*\*\*\*.\*\*\*.\*\*\*. \*\*..\* \*\*\* \*\*..\*\*..\*\*..\*\*..

human GCCCAGGTGTACCTCGGCCCGGACACCAGGCCGCCCGGGCTCCACCGCCCCCA  
rabbit GTCCATGAAGTACCTCGGCCCTGACCACCAGCCCCACGTGGTCTCAGCCACCAGCCCC  
\* \*\*\* \* :\*\*\*\*\* \* . \*\*\*\*\* \* . \* \*\*\* \*\* . \*\* . \*\* . \*\*\* .

human GCCCATGGTGTACCTCGGCCCGGACAACAGGCCCGCCTGGGCTCCACCGCCCCTCCA  
rabbit GTCCACGAAGTTACCTCTGCCCGGCCACCAGCCCCACGTGGTCTCAGCCACCAGCCCC  
\* \*\*\* \* :\*\* \*\*\*\*\* \*\*\*\*\* . \*\* . \*\*\* \*\* . \* \* \*\* \*\* . \*\* . \*\* . \*\* .

human GTCCACAATGTACCTCG-----GCCTCAGGCTCTGCATCAGGCTCAGTTCTACTCTG  
rabbit GTCCATGAAGTACCTCGGCCCGGCCACCAGCCCCACGTGGTCTCAGCCACCTCCCC  
\*\*\*\*\* . :\*\*\*\*\* \*\*\*\*\* :\* :\* \*

human GTGCACAACGGCACCTCTGCCAGGGCTACCACAACCCAG---CCAGCAAGAGCACTCCA  
rabbit GTCCACGAAGTACCTCTGCCCTGGCCACCACCATGCCAGTTGGCACTCTGAGCACACCA  
\*\* \*\*\* . \* \* \*\*\*\*\* . \*\*\* \*\*\*\*\* \* \*\*\*\*\* \* . :\*\*\*\*\*:\*\*\*

human TTCTCAATCCCAGCCACCCTCTGATACTCCTACCACCCTTGCCAGCCATAGCACCAAG  
rabbit TCTTCGGTTCCCAG---CCACACTGGCACTCCCACCACCCTTCCCAGCCCCAGCCACAG-  
\* \*\* . \*\*\*\*\* \*\*\*\*\*:\*\*\* . \*\*\*\*\* \*\*\*\*\* \*\*\*\*\* . \*\*\* . \*\* .

human ACTGATGCCAGTAGCACTCACCATAGCAGGTACCTCCTCTCACCTCCTCCAATCACAGC  
rabbit -----CACGGGTTCTCCTGTCACCACTTCGACTCAGAGC  
\*\*\*\*\* : \*\*\*\*\* \*\*\*\*\*:\* \*\* \* . \*\*\* \*\*

human ACTTCTCCCAGTTGTCTACTGGGTCTCTTTCTTTTCTGTCTTTTACATTTCAAAC  
rabbit ACTGCTCCCAGGTGTCTGCTGGTTTGTCTTTCTTCTCCTGTCTTTTACATCACCAAC  
\*\*\* \*\*\*\*\* \*\*\*\*\* . \*\*\*\*\* \* \*\*\*\*\* \*\*\*\*\* \*\*\*\*\* \*\*\*\*\* :\* . \*\*\*

human CTCCAGTTTAATTCCTCTCTGGAAGATCCCAGCACCGACTACTACCAAGAGCTGCAGAGA  
rabbit CTGCAGTTCAATTCCTCCCTGGAGGATCCAAGCAGCAAGTACTATCAAGAGCTGCAGAGG  
\*\* \*\*\*\*\* \*\*\*\*\* \*\* \*\*\*\*\* . \*\*\*\*\* . \*\*\*\*\* \* . \* \*\*\*\*\* \*\*\*\*\* .

human GACATTTCTGAAATGTTTTGCAGATTTATAACAAGGGGTTTTCTGGCCTCTCCAAT  
rabbit AATGTTTTCGGCACTGATTTCACAGATCTATGGACAGAAGAAGTTCCTGGCCTCTCTGGT  
. \* . \*\*\*\*\* \* . \* . \*\* :\*\*\* . \*\*\*\*\* \*\* . \*\* . . \* . . \*\* \*\*\*\*\* . . \*

human ATTAAGTTCAGGCCAGGATCTGTGGTGGTACAATTGACTCTGGCCTCCGAGAAGGTACC  
rabbit ATCAGGTTTCAGGCCAGGATCCGTGGTGGTGGACTTGATTCTGGCCTCCAGGAGGGCAGC  
\*\* \*.\*\*\*\*\* \*\*\*\*\*. \*.\*\*\* \*\*\*\*\*. \*.\*\* \* \*

human ATCAATGTCCACGACGTGGAGACACAGTTCAATCAGTATAAAACGGAAGCAGCCTCTCGA  
rabbit ACCAATGAAGTCAGGTGCAGTCACAGTTTATTCAGAATATACCGCAAGCAGCCAG—G  
\* \*\*\*\*\*. [\* . \*\* \*:\*\*\*\*\*\* \*:\*\*\*\*\*:\*\*\*:\*. \*\* \*\*\*\*\*:

human TATAACCTGACGATCTCAGACGTCAGCGTGAGTGATGTGCCATTTCTTTCTCTGCCAG  
rabbit TATAACCTGAACATTTCAAGAGTCACAGTGCCTGATGTTCTGTCTCCCTCCTCTGCCAG  
\*\*\*\*\*. \*\* \*\*..\*\*\*\*. \*\*.\* \*\*\*\*\* \* . \* \*\* \* \*\*\*\*\*

human TCTGGGGCTGGGGTGCCAGGCTGGGGCATCGCGCTGCTGGTGTCTGTGTTCTGGTT  
rabbit TCTGG-----AGTTCCAGGCTGGGGATCGCCCTGCTGCTGGTGTCTGTGCTCCTGCTT  
\*\*\*\*\* . \*\* \*\*\*\*\* \*\*\*\*\* \*\*\*\*\* \*\*\*\*\* \*\*\*\*\* \*\* \*\*

human GCGCTGGCCATTGTCTATCTCATTGCCTTGGCTGTCTGTGTCAGTGCCGCCGAAAGAACTAC  
rabbit GCGCTGGCCATCATCTATTTATAGCCCTGGCCGTGTGTCAGTGCCGTGCAAGAACTGC  
\*\*\*\*\*. \*\*\*\*\* \*\*\*:\*\*\* \*\* \*\* \*\*\*\*\* \*\*.\* \*\*\*\*\*. \*

human GGGCAGCTGGACATCTTTCCAGCCGGGATACCTACCATCCTATGAGCGAGTACCCACC  
rabbit GGGCAGCTGGATCTCTTCCGACCCGGGATACCTACCACCCCATGAGTGAGTACCCTACC  
\*\*\*\*\*. \*\*\*\*\* \*.\*\*\*\*\* \*\*\*\*\* \*\* \*\*\*\*\* \*\*\*\*\* \*\*

human TACCACACCCATGGGCGCTATGTGCCCTAGCAGTACCGATCGTAGCCCTATGAGAAG  
rabbit TACCACACCCACGGCCGCTACGTGCCCTGGCAGCACCAGACGGAGCCCATATGAGGAG  
\*\*\*\*\* \*\* \*\*\*\*\*. \*\*\*\*\* \*\*.\* [\* \*\*\*\*\*. \*\*\*\*\*. \*\*

human GTTTCTGCAGGTAATGGTGGCAGCAGCCTCTCTTACACAAACCCAGCAGTGGCAGCCACT  
rabbit GAATCTGCGGGCAACGGGGTAGCGGCCTTTCTTACACGAGTCCACCCGTGGCAGCCACT  
\*.:\*\*\*\*\*. \*\* \*\* \* \* \*\*\*.\*\*\* \*\*\*\*\*. \*. \*\* \*.\* \*\*\*\*\*

human TCTG—CCAACTTGTAGGGGCAGTCGCCCCTGAGCTGAGTGGCCAGCCAGTGCATTCC  
rabbit TCTGCCATCTTGCTGGGACATG-----TACTTTTACCAAGGGCCAGCCGGGGCTGGCT  
\*\*\* \*\*\*:\*\*\* :\*\*\*. \*\* \* . \*\* : . \*. \*\*\*\*\*. \* \* \*' \*

human            ACTCCACTCAGGTTCTTCAGGGCCAGAGCCCTGCACCCTGTTTGGGCTGGTGAGCTGGG  
rabbit            -----

human            AGTTCAGGTGGGCTGCTCACAGCCTCCTCAGAGGCCCCACCAATTTCTCGGACACTTCT  
rabbit            -----

human            CAGTGTGTGGAAGCTCATGTGGGCCCTGAGGGCTCATGCCTGGGAAGTGTGTGGTGGG  
rabbit            -----

human            GGCTCCAGGAGGACTGGCCCAGAGAGCCCTGAGATAGCGGGGATCCTGAACTGGACTGA  
rabbit            -----

human            ATAAAACGTGGTCTCCCACTGCGCAA  
rabbit            -----

Underline fields are primer sequences we used.





human AATGTGATGGAGACAG-----CTCCTCCAGATGAAATGACCACATCATTTCCC  
rabbit ACTCTGACAGAGACTGTCTCTCAGGCGACATCCCCTCCAGGTGAAACAGCCACATCTCCC  
\* . \* \*\* . \*\*\*\*\*: \* : \* \*\* . : \* . : . \* . \* . : \*\* \*\*\*\*

human TCCAGTGTCACCAACACACTCATGATGACATCAAAGACTATAACAATGACAACCTCCACA  
rabbit TCCAGTGTTAGCCAGACATCAAC---AACATCAGAAGTGCTCAAACTCCAACCTCCTCA  
\*\*\*\*\* \* \* . \* \*\* . \* . \*\*\*\*\* . \* . . \* . \* \* . \*\*\*\*\*: \*\*

human GACTCCACTCTTGAAACACAGAAGAGACATCAACAGCAGGAAGTAAAGTTCTACCCCA  
rabbit TATTCAACTGTGAAACAACCGAAGAAACGTCAACATCTAAAAGTGGGAGTCTCTCCA  
\* \*\* . \*\* \* \* . \* . \* . \* . \*\*\*\*\* . \* . \*\*\*\*\* \* : . \* . \* . \* \* \*

human GTGACCTCAGCAGTCTCAATAACAGCTGGACAGGAAGGACAATCACGAACAACCTCCTGG  
rabbit GTCACCTCAGCAGTCTCCTCAACAG-----CAACTTCTTCA  
\*\* \*\*\*\*\*: \*\*\*\*\* \*\*\*\*\* \*

human AGGACCTCTATCCAAGACACATCAGCTTCTTCTCAGAACCCTGGACTCGGAGCAGGCAG  
rabbit ACAACCTCCACTCAGGAAACATCAGCCGTTTCTCAGAATCCACAGACTCAGGGTGGGGAG  
\* . \*\*\*\*\* \* \*\* . \* . \*\*\*\*\* \*\*\*\*\* \* . . \*\*\*\*\* . \* \* . \* \*\*

human ACCACCAGGAATCTCAAACCAGCACCCTAACACACAGAACCCTTCAACTCCTTCTTTC  
rabbit ACCACCAGAGGATCTCAAACCAGCACCCTGTGGAGGTGACTACATCAGCACCTCCATCC  
\*\*\*\*\* . \* . \*\*\*\*\* . \*\*\*\*\*: . \* . \* . \* \* : \* \* \* : \* \* \*

human TCTCCAAGTGACACAATGTGACAGGGACTGTTTCTCAGAAGACATCTCCTTCAAGTGAA  
rabbit TCCCAGGTAGACATAGTGTGCTCACTGACAATTTCTCAGGCAACATCCCCTCTAGGTGAA  
\*\* \*\* . \* . \* \* . \* . : \* \* \* \* : \* . \*\*\*\*\* . . \*\*\*\*\* \*\* \*\*\*\*\*

human ACAGCTACCTCATCCCTCTGTAGTGTCACAAACACATCCATGATGACATCAGAGAAGATA  
rabbit ACAGCCACCACATCTGTTTCCATAGTCAGCAAGACACCCTGAGAACAGCAGGAGTGATG  
\*\*\*\*\* \*\* : \* \* \* \* \* \* \* : \* \* \* . \* \* \* \* . \* \* \* \* . \* \* \* \* . : \* \* \*

human ACAGTGACAACCTCCACAGGCTCCACTCTTGAAACCCAGGGAGACATCATCAGTACCT  
rabbit ACAATGACAACCTCTGCACCCTCAACTCTGGCAACCACAGAAGG---TACGTATCCTCT  
\*\* . \*\*\*\*\* \*\* . \* \* \* . \*\*\*\*\* \* \* . \* . \* . \* . : \* . \* \* . \*

human GTTACTGGAAGTCTTATGCCAGTCACCTCAGCAGCCTTAGTAACATTTGATCCAGAAGGA  
rabbit AACACTGGGAGTCCTCCTCCAGTCACCTCAGCAGTCTCCACAACAGCTGCAACAGAAGAA  
. : \*\*\*\*\*. \*\*\*\* \*. \*\*\*\*\* \*\*\*\*\* \*\* .. \*\*\*\* \*\* : \*\*\*\*\*. \*

human CAATCACCAGCAACTTTCTCAAGGACTTCTACTCAG---GACACAACAGCTTTTTCTAAG  
rabbit AAATCTGCATCAACCTCTTTAACGACCTCCACTCTGGATGGAACATTAGCATTTTCATGG  
. \*\*\*\*\*: \*\* \*\*\*\* \* \* \*\* \*\*\* \*\* \*\*\*\*\*: \* \* . \*\*\*\*: \*\*\*\*:\*\*\*\*\*: : \*

human AACACCAGACTCAGAGCGTGGAGACCACCAGAGTATCTCAAATCAACACCCTCAACACC  
rabbit AACCCCCAGACTCAGAGCATGGGTACCAGCACAGCATCCACACCAG-----TGCC  
\*\*\*\*. \*\*\*\*\*. \*\*\*\*. \*\*\*\* \*\* \*\* \*\* \* \* \* . \*\*

human CTCACACCGTTACAACATCAACTGTTTTATCCTCACCAAGTGGATTCAACCCAAGTGA  
rabbit CCTACAGAGGAGACTGCATCAACTCCTACATCTTCTCTGAGTGGACACACTCTGACAGAG  
\* \*\*\* .\*\* : \*\* : \*\*\*\*\* \* : \*\*\* \*\* : \*\*\*\*\* : \*\* . \* \* : \* .

human ACAGTTTCTCAGGAGACATTCCCTTCTGGTGAACAACCACCTCATCCCCTCCAGTGTC  
rabbit ACCATTTCCAGGAGACAATCCCTCCAATAAAATGGCCACTATACCTCCTCCAGTACC  
\* . \*\*\*\* \*\*\*\*\*:\*\*\*\*\* \* : \* . \*\*\* .. \*\*\*\*\* : \* \* \*\*\*\*\*. \*

human AGCAATACATTCTGGTAACATCAAAGGTGTTGAGAATGCCAACCTCCAGAGACTCTACT  
rabbit CACAACACAGACCCAACAACAATGGAGGTATCCAAAATGCCAACCTCCCCAGACTCCACT  
.. \*\*\* \*\* :\*\* .. \*\*\*\*\*: .. \*\*\*\*\*. \* \*\* .\*\*\*\*\*. \*\*\*\*\* \*\*

human CTTGAAACACAGAGGAGACATCACTATCTGTAAGTGAACCATTTCTGCAATCACTTCC  
rabbit GTGGA AACAGAGGGCACACATCACTACCTACAACCTGGGAACATGCCTGTATTCACTTCT  
\* \* .\*\*\*\*\* \*\* . \* \* \*\*\*\*\* \*\* . \*\* \*\*\*. \* .\*\*\* \*\*\* \* :\*\*\*\*\*

human AAAGTTTCAACCATATGGTGGTCAGACACTCTGTCAACAGCACTCTCCCCAGTTCTCTA  
rabbit AAAGTGCAACCACAC-----CCCTCTCAACTAGTTCTTTA  
\*\*\*\*\* \*\*\*\*\* \* \* .\*\*\*\*\*. \* \*\*\*\*\* \*\*

human CCTCCAAAATATCCACAGCTTTCCACACCAGCAGAGTGAAGTGCAGAGACCACAGGA  
rabbit ACTTCAAAAACATTAACAGTTTTCCACCTACCAAGAAAAGGCACAGAGACTCCAAGA  
. \*\* \*\*\*\*\* \*\* .\*\*\*\* \*\*\*\*\*.\*\*\*\*\* \* \*\* .\*\* : \*\*\*\*\* .\*\*\*\*\* .\*\* \*\*

human CGGCCTCATGAGAGGAGCTATTCTCTCCAGGTGTGTCTCAAGAAATATTTACTCTACAT  
rabbit TGGTCTCATGACAGCAGCCTGATTTCTACAAGTATGCCAGGAGACATTATTACAGAG  
\*\* \*\*\*\*\* \*\* \*\*\* .:\* \*\*\*,\*\*,\* \*\*\*,\*\*,\* \*\*\*,\*\*,\* \*\*\*,\*\*,\* \*\*\*,\*\*,\* \*\*\*,\*\*,\*

human GAAACAACAACATGGCCTTCTCATTCTCCAGCAAAGGCCACACAACCTTGGTCACAAACA  
rabbit AAAATGACAATGGTGACATCATCATTCTCTGTTGATAACAACAACACTCAGCTTCCAAAA  
.\*\*\*.\*\*\*. \*.\*:\*\*,\*\*\*\*\*\*. \*.\*:\*\*,\*\*\*\*\*\*. \*.\*:\*\*,\*\*\*\*\*\*. \*.\*:\*\*,\*\*\*\*\*\*.

human GAACTGCCCTCAACATCAACAGGTGCTGCCACTAGGCTTGTACAGGAAATCCATCTACA  
rabbit GAACTATTGTCAATGCCAACAGGAGTTACCTGTTACCTTGTACCCAAAAGCCAACTCCT  
\*\*\*\*\*, \*\*\*, \*\*\*,\*\*,\* \*\*\*,\*\*,\* \*\*\*,\*\*,\* \*\*\*,\*\*,\* \*\*\*,\*\*,\* \*\*\*,\*\*,\* \*\*\*,\*\*,\*

human GGGACAGCTGGCACTATTCCAAGGGTCCCCTCTAAGGTCTCAGCAATAGGGGAACCAGGA  
rabbit TCAACAACCTGGCACCACAGTTTGGGTACACCTGAGGTCCCAACAACAGGAGAATTAGGA  
.\*\*\*,\*\*\*\*\* \* : :\*\*\*\*\*,\* \*\*,\*\*\*\*\*\* \*\*,\* \*\*,\* \*\*,\* \*\*,\* \*\*,\* \*\*,\*

human GAGCCCACCACATACTCCTCCCACAGCACAACCTCTCCAAAAACAACAGGGGCAGGCGCC  
rabbit GAGTCAACCACACAGCCTGATATGAGCCCATCTACTCAGAAAACCATGATAGCAGTTTCC  
\*\*\* \*,\*\*\*\*\* \* \* . : \*\*\*,\*\*:\* \*\*,\* \*\*,\* \*\*,\* \*\*,\* \*\*,\* \*\*,\* \*\*,\* \*\*,\*

human CAGACACAATGGACACAAGAAACGGGGACCACTGGAGAGGCTCTTCTCAGCAGCCCAAGC  
rabbit CAGACACAATGGACACAAGGTCCAAGGACCACTGGAGAGATTACATCAACAGTCCGAGC  
\*\*\*\*\* \*\*\*,\*\*,\* \*\*\*,\*\*,\* \*\*\*,\*\*,\* \*\*\*,\*\*,\* \*\*\*,\*\*,\* \*\*\*,\*\*,\* \*\*\*,\*\*,\* \*\*\*,\*\*,\*

human TACAGTGTGACTCAGATGATAAAAACGGCCACATCCCATCTTCTTACCTATGCTGGAT  
rabbit TCTGTTCAACTATGGTCATGGAAACAGTGGCATCCCATCTCCTTCATCAACAATAAGC  
\* . \*\* .\*\*\*. :\*. \* \*\*,\* \*\*,\* \*\*,\* \*\*,\* \*\*,\* \*\*,\* \*\*,\* \*\*,\* \*\*,\* \*\*,\* \*\*,\*

human AGACACACATCCAACAAATTACAACGGCACCATCAACAAATCATTCAACAATACATTCC  
rabbit AGACATACATCTCAAGAACTATCACAGCATGCCAAAAGCTCAGTCCACACCACTCCCA  
\*\*\*\*\* \*\*\*,\*\*,\* \*\*\*,\*\*,\* \*\*\*,\*\*,\* \*\*\*,\*\*,\* \*\*\*,\*\*,\* \*\*\*,\*\*,\* \*\*\*,\*\*,\* \*\*\*,\*\*,\*

human ACAAGCACCTCTCCTCAGGAATCACCAGCTGTTTCCAAAAGGGTCACACTCAAGCCCG  
rabbit CCCAGCAGCTTCTCCTCGGAATCCTTGTCTATGCCAGCATAGGTACACTCAGCCACA  
. \* ,\*\*\* \*\* \*\*\*\*\* ,\*\*\*\*\*. \* . \*\*,\* \* \*\*,\* \*\*,\* \*\*,\* \*\*,\* \*\*,\* \*\*,\*

human CAGACCACACAAGAATCACAAACCACGAGGTCCGTCTCCCCATGACTGACACCAAGACA  
rabbit CTGACCACACCAGAATCCCAAGCCATGAGTTCATCACCCCCGAGACTGACACACCCAAT  
\*.:\*\*\*\*\*. \*\*\*\*\*. \*\*\*. \*\*\* \*\* \* . \*\*.:\*\*\*\*\*. :\*\*\*\*\*. . . \* . :  
  
human GT---CACCACCCAGGTTCTTCTTCACAGCCAGTGGGCACTCGCCTCAGAAATTGTT  
rabbit GTGGCAACATCCGCAGCCTCTTCTGCCACACCAAGTGGACCCATCCTCAGAAAGCACT  
\*\* . \*\*. :.\* \*\*\* \*\*\*\*\* \*\*\*\*\* \* .\*\*\*\*\*. \* .\*\*\*. \*\*\*\*\* . \*  
  
human CCTCAGGACGCACCCACCATAAGTGCAGCAACAACCTTTGCCCAGCTCCACCGGGGAT  
rabbit CCTCAGGAGGCATCCACCGTGGCTGCGGTGACAACCTCCATCCCTGCACCCTCAGG---  
\*\*\*\*\* \*\* \* .\*\*\*. \* . . \*\*\*. \* .\*\*\*\*\* . \*\*\*.\*:\*\*\*:\* . \*\*  
  
human GGTACACAACCCAGGCCCGACCACAGCACTGCAGGCAGCACCAGCAGCCATGATGCC  
rabbit -----GACAGCCACCCAGCCACAGGACCACGCCAGCACCACCAGCCCCAGCCCC  
. . \* . . \*\*\*. . \*\*\*\*\* \*\* . \* \* \*\*\*\*\*. . \*\*\*\*. . . \*\*  
  
human ACCCTGGGGCCCTCAGGAGGCAGTCACTTTCCAAAACAGGTGCCCTTACTCTGGCCAAC  
rabbit ACCCTCCGGCCCTCCGGAGCCCACACTCTCCACAGCAAGCAGGTTTCCCAGGACGCT  
\*\*\*\*\* \*\*\*\*\*. \*\*\*\* \* . \* . \*\*\*\*\* \*\*\*\*. \* . \*\* \* . \* \*\*.\* :\*. \* :\*. \* .  
  
human TCTGTAGTGTCAACACCAGGGGGCCCAGAAGGACAATGGACATCAGCCTCTGCCAGCACC  
rabbit GCTGTACCTCCCATCAGGGGGCCCAGGAGGACAGCAGGCATTGCCTTTTGAAGCACC  
\*\*\*. . \* . \*\* \*\*\*\*\*. \*\*\*\*\*. . \* . \*\*\* . \* \* \*\* . \*\*\*\*\*  
  
human TCACCTGACACAGCAGCAGCCATGACCCATACCCACCAGGCTGAGAGCACAGAGCCTCT  
rabbit TCCCCTGACACAGCCCAAGTCATTTCCAAAACCCAGCAGACTCGAGGCACAGAGACCACC  
\*\* . \*\*\*\*\*. . \*\* \*\*\* :\*\*\*:\*\*\*\*\* \*\* . \*\* . . \*\*\*\*\*. \*\*\*:  
  
human GGACAAACACAGACCAGCGAACCGGCCCTCCTCAGGTCACGAACCACCTCAGCGGCACA  
rabbit GGGGAGGCTCAGCCAGCACCAGCCCCCTCAGTGCCAGACCCACCGCCGACCCATG  
\* . \* . :\*\*\*. \*\*\*\*\*. . \*\*\*. \*\*\* \*\*\*\*\* \* \*\* . . \*\*\*\*\* . \* . \* \*\* .  
  
human GCTACCCCTTCTCATCCGGGGCGAGTGGCACAACCTTCAGG---AAGCGAAGGAATA  
rabbit GCTGCCACGTCTTCCCCACGGCAAGGGGCACAACCTTTGGAAGGCTTTCCCGGAAACG  
\*\*\*. \*\* . \* \*\* \* . \* . \*\*\*. \* \* \*\*\*\*\*. \* \* \* : : \* . . \* . \*\* .

human TCCACCTCAGGAGAGACGACAAGGTTTTTCATCAAACCCCTCCAGGGACAGTCACACAACC  
rabbit GCCACTGCAGCCAAGACCACCGACTTTCCACAACCTCCCTCCAGCAGCAGCCAGCAGCT

\*\*\*\* \*\* ..\*\*\*\* \*. .. \*\* \* :\*\*\*. \*\*\*\*\*. .. \*\* \*\*.\*. \*. \*

human CAGTCAACAACCGAATTGCTGTCCGCCTCAGCCAGTCATGGTGCCATCCCAGTAAGCACA  
rabbit CCGCCAACGGCTGAGCTGTTGTCTCTGGCACCAGTCCTGACGCTACCCCTGCAGCCGTA

\*. \* \*\*\*\*. \* \*\*.\* \*\* \*\*\*\*\* \* ..\*\*\*\*\*. \*\*.\* \*\* \* \*\*\*\*:\* \* . \* . \*

human GGAATGGCGTCTTCGATCGTCCCCGGCACCTTTCATCCCACCCTCTCTGAGGCCTCCACT  
rabbit GGAATGAGGTCTCCTGCTGTACCCAGCACCTCTCCTCCTACCATCACTGGGGTCCCGACT

\*\*\*\*\*. \*\*\*\* \* . \*.\*\*\*.\*\*\*\*\* \*\*.\* \*\*.\* \*\*.\* \*\*.\* \*\*.\* \*\*.\* \*\*.\* \*\*.\*

human GCAGGGAGACCGACAGGACAGTCAAGCCCAACTTCTCCAGTGCCTCTCCTCAGGAGACA  
rabbit GATTGGACAGCGTCTTCCAG-----GACCCCTCAGGAGAAG

\*. : \*\*\* \* \*\*:\* : .. :\* \*\*\*\*\*.\*\*\*\*\*. .

human GCCGCCATTTCCGGATGGCCAGACTCAGAGGACAAGAACCAGCAGAGGGTCTGACACT  
rabbit CCAGCTGTCTCCAGATGGCTCACACTCCAAGTGCAGGAGCCACCAGAGGACCTGAAGTC

\*. \*\* . \* \*\*\*\*.\*\*\*\*\* \*\* \*\*\*\*\*. \*\* . \*\*.\* \*\*.\* \*\*\*\*\*. \*\*\*\*. .

human ATCAGCCTGGCGTCCCAGGCAACCGACACCTTCTCAACAGTCCCACCCACACCTCCATCG  
rabbit AGCACCTTGGCCTGGCAGCTCACTGACACCTTCTCAGCAGTCACAGCGCCACCACCTCG

\* \*\* \* \*\*\*\* \* \*\* . \*\* \*\*\*\*\*.\*\*\*\*\*.\*\*\*\*\*. \*\* \* .\*\*\*\*:\* \*\*.\* \*\*.\*

human ATCACATCCACTGGGCTTACATCTCCACAAACCGAGACCCACACTCTGTCACCTTCAGGG  
rabbit CCCACAACCAG-----

. \*\*\*\*:\*\*\*\*\*

human TCTGGTAAAACCTTACCACGGCCCTCATCAGCAACGCCACCCCTTCTCCTGTACCTAC  
rabbit -----

human GCTTCCTCGGCATCCACAGGTCACACCACCCCTTTCATGTCACCGATGCTTCCTCAGTA  
rabbit -----

human TCCACAGGTCACGCCACCCCTCTTCTGTACCAGCCCTTCTCAGTATCCACAGGTCAC  
rabbit -----

human ACCACCCCTCTTCTGTACCGACACTTCTCAGAATCCACAGGTCAGGTCACCCCTCTT  
rabbit -----

human CCTGTACCAGCTTTTCTCAGCATCCACAGGTGACAGCACCCCTCTTCTGTCACTGAC  
rabbit -----

human ACTTCTCAGCATCCACAGGTCAGGTCACCCCTCTTCTGTACCAGCCTTTCTCAGCA  
rabbit -----

human TCCACAGGTGACACCACCCCTCTTCTGTCACTGACACTTCTCAGCATCCACAGGTCAC  
rabbit ---CCCACTGAGCACACATCACAAACCGAGACTCGCACTCCCTCACCTTCAGGCAGCAGC  
 .\*. \*\* .\*. \*!\*:\*. \*! \*\*\* .\*\*\* \*\*\*\*\* \*!\*. .\*. \* .\*

human GCCACCTCTTCTGTACCGACACTTCTCAGTATCCACAGGTCACACCACCCCTCTT  
rabbit ACAGCCTCTATTAATTCTTCAATTGTCTCAGTCTGTACCTGGCCCTCCAGCACCGGGAGT  
 .\*.\*\*\*\*\*.\*. \* :\* :!\* . \*\*!\* \* . . \*\*.\* \*\*\* . \*

human CCTGTACCGACACTTCTCAGCATCCACAGGTACGCCACCTCTTCTGTACCGAC  
rabbit CCT-----  
\*\*\*

human ACTTCTCAGTATCCACAGGTCACACCACCCCTCTTCAATGTCAGTATGCTTCTCAGCA  
rabbit ---CCTACCCTAGTTCCAGGTCACACTGCTCCCTGCCAGTTACAACACTTCTCCCA  
 \* !\* \*\* .\*\*\*\*\* . \* \*\* \* \* !\* \*! .\*.\*\*\*\*\*. \*\*

human TCCACAGGTCAGGCCACCCCTCTTCTGTACCAGCCTTCTCAGTATCCACAGGTGAC  
rabbit CCCACAG-----  
\*\*\*\*\*

human ACCAGCCTCTTCTGTCACTAGCCCTTCTCAGCATCCACAGGTACGCCACCCCTCTT  
rabbit -----

human CTTGTCACCGACTTCCTCAGCATCCACAGGACAGGCCACCCCTTCTTCTGTACCGAC  
rabbit -----

human GCTTCCTCAGTGTCACAGATCAGGCCACCTCTTCTGTAAACCATCCCTCCGCAGCA  
rabbit -----

human TCCACAGGTACACCCACCCCTTCTTCTGTACCGACTTCCTCAGCATCCACAGGTACG  
rabbit -----

human GCCACCTCTTCTTGTACCGACTTCCTCAGTATCCACAGGTGACACCAGCCTCTT  
rabbit -----

human CCTGTCACTAGCACTTCCTCAGCATCCACAGGTACGTCACCTCTTTCATGTACCAGC  
rabbit -----

human CCTTCCTCAGCATCCACAGGTACGCCACCCCTTCTTCTGTACCAGCCTTCTCAGCA  
rabbit -----

human TCCACAGGTGACACCATGCCTCTTCTGTCACTAGCCCTTCTCAGCATCCACAGGTGAC  
rabbit -----

human ACCACCCCTTCTTCTGTACCGACGCTTCTCAGTATCCACAGGTACACCCACCCCTCTT  
rabbit -----



human CATGTCACTGATGCTTCCTCAGCATCCACAGGTCAGGCCACCCCTCTTCCTGTCACCAGC  
rabbit -----

human CTTTCCTCAGTATCCACAGGTGACACCACGCCTCTTCCTGTCACTAGCCCTTCCTCAGCA  
rabbit -----

human TCCACAGGTCACGCCACCCCTCTTCTTGTACCGACACTTCCTCAGCATCCACAGGACAC  
rabbit -----

human GCCACCCCTCTTCCTGTCACCGACGCTTCCTCAGTGTCCACAGATCAGGCCACCTCTCTT  
rabbit -----

human CCTGTAACCATCCCTTCCGCAGCATCCACAGGTCACACCACCCCTCTTCCTGTCACCGAC  
rabbit -----

human ACTTCCTCAGCATCCACAGGTCAGGCCACCTCTCTTCTTGTACCGACACTTCCTCAGTA  
rabbit -----

human TCCACAGGTGACACCACGCCTCTTCCTGTCACTAGCACTTCCTCAGCATCCACAGGTCAC  
rabbit -----

human GTCACTCCTCTTCATGTCACCAGCCCTTCCTCAGCATCCACAGGTCAGGCCACCCCTCTT  
rabbit -----

human CCTGTCACCAGCCTTTCTTCAGCATCCACAGGTGACACCATGCCTCTTCCTGTCACTAGC  
rabbit -----

human CCTTCCTCAGCATCCACAGGTGACACCACCCCTCTTCCTGTCACCGACGCTTCCTCAGTA  
rabbit -----

human TCCACAGGTACACCACCCCTCTTCCTGTCACCAGCCCTTCCTCAGCATCTACAGGTAC  
rabbit -----

human ACCACCCCTCTTCCTGTCACCGACACTTCCTCAGCATCCAAAGGTGACACCACCCCTCTT  
rabbit -----

human CCTGTCACCAGCCCTTCCTCAGCATCTACAGGTACACCACCCCTCTTCCTGTCACCGAC  
rabbit -----

human ACTTCCTCAGCATCCACAGGTGACACCACCCCTCTTCCTGTCACCAATGCTTCCTCATT  
rabbit -----

human TCCACAGGTACAGCCACCCCTCTTCATGTCACCAGCCCTTCCTCAGCATCCACAGGTAC  
rabbit -----

human GCCACCCCTCTTCCTGTCACCAGCACTTCCTCAGCATCCACCGGTACGCCACCCCTCTT  
rabbit -----

human CCTGTCACCGGCCTTTCTCAGCTACCACAGATGACACCACCCGTCTTCCTGTCACCGAC  
rabbit -----

human GTTTCCTCGGCATCCACAGGTGAGCCACCCCTCTTCCTGTCACCAGCCCTTCCTCAGTA  
rabbit -----

human TCCACAGGTGACACCACGCCTCTTCTGTCACTAGCCCTTCCTCAGCATCCACAGGTGAC  
rabbit -----

human GCCAGCCCTCTTCTTGTCACTGACGCTTCCTCAGCATCCACAGGTGAGGCCACCCCTCTT  
rabbit -----

human CCTGTCACCGACACTTCCTCAGTATCCACAGCTCAGGCCACCCCACTTCCTGTCACCGGC  
rabbit -----

human CTTTCTCAGCTTCCACAGATGACACCACCGTCTTCCTGTCACCGAGGTTTCCTCGGCA  
rabbit -----

human TCCACAGGTGAGGCCATCCCTCTTCTGTACCAGCCCTTCCTCAGCATCCACAGGTGAC  
rabbit -----

human ACCACCCCTCTTCTGTCACCGACGCTTCCTCAGCATCCACAGGTGACACCACCTCTCTT  
rabbit -----

human CCTGTCACCATCCCTTCCTCAGCATCTTCAGGTCACACCACCTCTCTTCTGTCACCGAC  
rabbit -----

human GCTTCCTCAGTGTCCACAGGTGACGCCACCTCTCTTCTGTCACCGAGGTTTCCTCAGTA  
rabbit -----

human TCCACAGGTGACACCACCCCTCTTCTGTACCAGACTAACTCAGCATCCACAGGTGAC  
rabbit -----

human ACCACCCCTCTTCATGTCACCGACGCTTCCTCAGTATCCACAGGTCAGGCCACCTCTCTT  
rabbit -----

human CCTGTCACCAGCCTTTCTCAGCATCCACAGGTGACACCACGCCTTTCCTGTCAGTAGC  
rabbit -----

human CCTTCCTCAGCATCCTCAGGTCACACCACCCCTCTTCCTGTCACCGACGCTTCCTCAGTA  
rabbit -----

human CCCACAGGTCAGGCCACCTCTTTCCTGTCACCGACGCTTCCTCAGTGTCCACAGGTCAC  
rabbit -----

human GCCACCCCTCTTCCTGTCACCGACGCTTCCTCAGTGTCCACAGGTCATGCCACCCCTCTT  
rabbit -----

human CCGGTCACCGACACTTCCTCAGTATCTACAGGACAGGCCACCCCTCTTCCTGTCACCAGC  
rabbit -----

human CTTTCCTCAGCATCCACTGGTGACACCACGCCGCTTCCTGTCACCGATACTTCCTCAGCA  
rabbit -----

human TCCACAGGTCAGGACACCCCTCTTCCTGTCACCAGCCTTTCTCAGTATCCACAGGTGAC  
rabbit -----

human ACCACGCCTCTTCCTGTCAGTAAACCTTCCTCAGCATCCACAGGTCAGGCCACCCCTCTT  
rabbit -----

human CTTGTCACCGACGCTTCCTCAATATCCACAGGTCACGCCACCTCTCTTCTTGTCACCGAC  
rabbit -----

human GCTTCCTCAGTATCCACAGGTCACGCCACCGCTCTTCATGACACCGATGCTTCCTCATT  
rabbit -----

human TCCACAGGGGACACCACCCCTCTTCCTGTCACCAGCCCTTCCTCAACATCCACAGGTGAC  
rabbit -----

human ACCACCCCTCTTCCTGTCACCGAAACTTCCTCAGTATCCACAGGTCACGCCACCTCTCTT  
rabbit -----

human CCTGTCACCGACACTTCCTCAGCATCCACAGGTCACGCCACCTCTCTTCCTGTCACCGAC  
rabbit -----

human ACTTCCTCAGCATCCACAGGTCACGCCACCCCTCTTCCTGTCACCGACACTTCCTCAGCA  
rabbit -----

human TCCACAGGTCAGGCCACCCCTCTTCCTGTCACCAGCCCTTCCTCAGCATCCACAGGTCAC  
rabbit -----

human GCCATCCCTCTTCTTGTCACCGACACTTCCTCAGCATCCACAGGACAGGCCACCCCTCTT  
rabbit -----

human CCTGTCACCAGCCTTTCCTCAGCATCCACAGGTGACACCACCCCTCTTCCTGTCACCGAC  
rabbit -----

human GCTTCCTCAGTGTCCACAGGTCACGCCACCTCTCTCCTGTCACCAGCCTTTCCTCAGTA  
rabbit -----

human TCCACAGGTGACACCACTCCTCTTCCTGTCACTAGCCCTTCCTCAGCATCCACAGGTCAC  
rabbit -----

human GCCACCCCTCTTCATGTACCGACGCTTCCTCAGCATCCACAGGTCACGCCACCCCTCTT  
rabbit -----

human CCTGTCACCAGCCTTTCCTCAGCATCCACAGGTGACACCACGCCTCTTCCTGTCACTAGC  
rabbit -----

human CCTTCCTCAGCATCCACAGGTCACGCCACCCCTCTTCATGTACCGACGCTTCCTCAGTA  
rabbit -----

human TCCACAGGTGACACCACCCCTCTTCCTGTACCAGCTTCCTCAGCATCCTCAGGTCAC  
rabbit -----

human ACCACCCCTCTTCCTGTACCGACGCTTCCTCAGCATCCACAGGTGACACCACCCCTCTT  
rabbit -----

human CCTGTCACCGACACTTCCTCAGCATCCACAGGTACGCCACCCATCTTCCTGTACCGGC  
rabbit -----

human CTTTCCTCAGCTTCCACAGGTGACACCACCCGTCTTCCTGTACCAACGTTTCCTCGGCA  
rabbit -----

human TCCACAGGTCATGCCACCCCTCTTCTGTACCAGCACTTCCTCAGCATCCACAGGTGAC  
rabbit -----

human ACCACCCCTCTTCTGGCACCGACACTTCCTCAGTATCCACAGGTACACCACCCCTCTT  
rabbit -----

human CTTGTCACCGACGCTTCGTAGTATCCACAGGTGACACCACCCGTCTTCTGTACCAGC  
rabbit -----

human CCTTCTCAGCATCTACAGGTACACCACCCCTCTACCTGTCACCGACACTCCCTCAGCA  
rabbit -----

human TCCACAGGTGACACCACCCCTCTTCTGTACCAATGCTTCCTCATTATCCACAGTCAC  
rabbit -----

human GCCACCTCTTTCATGTCACCAGCCCTTCCTCAGCATCCACAGGTACGCCACCTCTCTT  
rabbit -----

human CCTGTCACCGACACTTCGGCAGCATCCACAGGTACGCCACCCCTCTTCTGTACCAGC  
rabbit -----

human ACTTCTCAGCATCCACAGGTGACACCACCCCTCTTCTGTACCGACACTTACTCAGCA  
rabbit -----

human TCCACAGGTGAGGCCACCCCTCTTCTGTACCAGCCTTTCCTCAGTATCCACAGGTGAC  
rabbit -----

human ACCAGGCCTCTTCCTGTCACTAGCCCTTCCTCAGCATCCACAGGTCAGGCCACTCCTCTT  
rabbit -----

human CTTGTCACCGACGCTTCCTCAGCATCCACAGGTCAGGCCACCCCTCTTCCTGTACCAGC  
rabbit -----

human CTTTCCTCAGTATCCACAGGTGACACCAGCCTCTTCCTGTCACTAGCCCTTCCTCAGCA  
rabbit -----

human TCCACCGGTCATGCCACCTCTTTCCTGTACCGACACTTCCTCAGCATCCACAGGTGAC  
rabbit -----

human ACCACCTCTCTTCCTGTACCGACACTTCCTCAGCATACACAGGTGACACCACCTCTCTT  
rabbit -----

human CCTGTACCGACACTTCCTCATCATCCACAGGTGACACCACCCCTCTTCTTGTACCGAG  
rabbit -----

human ACTTCCTCAGTATCCACAGGTGACACCACCCCTCTTCCTGTACCGACACTTCCTCAGCA  
rabbit -----

human TCCACAGGTCAGGCCACCCCTCTTCCTGTACCAACACTTCCTCAGTATCCACAGGTGAC  
rabbit -----

human GCCACCCCTCTTCATGTACCAGCCCTTCCTCAGCATCCACAGGTCACACCACCCCTCTT  
rabbit -----



human CCTGTCACCGACGCTTCGTCAGTGTCCACAGGTCACGCCACCTCTCTCCTGTCACCGAC  
rabbit -----

human GCTTCCTCAGTGTTACAGGTCATGCCACCTCTCTCCTGTCACCATCCCTTCCTCAGCA  
rabbit -----

human TCCTCAGGTCACACCACCCTCTTCCTGTCACCGACGCTTCCTCAGTGTCCACAGGTCAC  
rabbit -----

human GCCACCTCTCTCCTGTCACCGACGCTTCCTCAGTGTCCACAGGTCATGCCACCCTCTT  
rabbit -----

human CCTGTCACCGACGCTTCCTCAGTGTCCACAGGTCACGCTACCCCTCTTCCTCTCACCAGC  
rabbit -----

human CTTTCCTCAGTATCCACAGGTGACACCAGCCTCTTCCTGTCACCGACACTTCCTCAGCA  
rabbit -----

human TCCACAGGTCAGGCCACCCTCTTCCTGTCACCAGCCTTCCTCAGTATCCACAGGTGAC  
rabbit -----

human ACCACCCCTCTTCCTGTCACCGACACTTCCTCAGCATCCACAGGTCACGCCACCTCTCTT  
rabbit -----

human CCTGTCACCGACACTTCCTCAGCATCCACAGGTCACGCCACCCTCTTCCTGACACCGAC  
rabbit -----

human ACTTCCTCAGCATCCACAGGTCACGCCACCCTTCTTCCTGTCACCGACACTTCCTCAGCA  
rabbit -----

human TCCATAGGTCACGCCACCCTCTTCTTCCTGTCACCGACACTTCCTCAATATCCACAGGTCAC  
rabbit -----

human GCCACCCCTTTCATGTCACCAGCCCTTCCTCAGCATCCACCGGTCACGCCACCCCGCTT  
rabbit -----

human CCTGTCACCGACACTTCCTCAGCATCCACAGGTCACGCCAACCCCTTTCATGTCACCAGC  
rabbit -----

human CCTTCCTCAGCATCCACCGGTCACGCCACCCCGCTTCCTGTCACCGACACTTCCTCAGCA  
rabbit -----

human TCCACAGGTCACGCCACCCTCTTCTTCCTGTCACCAGCCTTTCCTCAGTATCCACAGGTGAC  
rabbit -----

human ACCACGCCTTTCCTGTCAGTACCCCTTCCTCAGCATCCACAGGTCACACCACCCTCTT  
rabbit -----

human CCTGTCACCGACACTTCCTCAGCATCCACAGGTCAGGCCACCGCTTTCCTGTCACCAGC  
rabbit -----

human ACTTCCTCAGCATCCACAGGTGACACCACCCTTCTTCCTGTCACCGACACTTCCTCAGCA  
rabbit -----

human TCCACAGGTCAGGCCACCCCTCTTCCTGTCACCAGCCTTTCCTCAGTATCCACAGGTGAC  
rabbit -----

human ACCAGCCTCTTCCTGTCAGTACTAGCCCTTCCTCAGCATCCACAGGTACGCCACTCCTCTT  
rabbit -----

human CTTGTCACCGACGCTTCCTCAGCATCCACAGGTACGCCACCCCTCTTCCTGTCACCAGC  
rabbit -----

human CTTTCCTCAGTATCCACAGGTGACACCAGCCTCTTCCTGTCAGTACTAGCCCTTCCTCAGCA  
rabbit -----

human TCCACCGGTCATGCCACCTCTCTTCCTGTCACCGACACTTCCTCAGCATCCACAGGTGAC  
rabbit -----

human ACCACCTCTCTTCCTGTCACCGACACTTCCTCAGCATACACAGGTGACACCACCTCTCTT  
rabbit -----

human CCTGTCACCGACACTTCCTCATCATCCACAGGTGACACCACCCCTCTTCTTGTCACCGAG  
rabbit -----

human ACTTCCTCAGTATCCACAGGTACGCCACTCCTCTTCTTGTCACCGACGCTTCCTCAGCA  
rabbit -----

human TCCACAGGTCAGGCCACCCCTCTTCATGTCACCAGCCTTCCTCAGCATCCACAGGTGAC  
rabbit -----

human ACCACCCCTGTGCCTGTCACCGACACTTCCTCAGTATCCACAGGTCAGGCCACCCCTCTT  
rabbit -----

human CCTGTCACCGGCCTTTCCTCAGCTTCCACAGGTGACACCACCCGTCTTCCTGTCACCGAC  
rabbit -----

human ATTCCTCGGCATCCACAGGTCAGGCCACCCCTCTTCCTGTCACCAACACTTCCTCAGTA  
rabbit -----

human TCCACAGGTGACACCATGCCTCTTCCTGTCACTAGCCCTTCCTCAGCATCCACAGGTCAC  
rabbit -----

human GCCACCCCTCTTCCTGTCACCAGCACTTCCTCAGCATCCACCGGTCAGGCCACCCCTGTT  
rabbit -----

human CCTGTCACCAGCACTTCCTCAGCATCTACAGGTACACCACCCCTCTTCCTGTCACCGAC  
rabbit -----

human ACTTCCTCAGCATCCACAGGTGACACCACCCCTCTTCCTGTCACCAGCCCTTCCTCAGCA  
rabbit -----

human TCTACAGGTACACCACCCCTCTTCATGTACCATCCCTTCCTCAGCATCCACAGGTGAC  
rabbit -----

human ACCAGCACTCTTCCTGTCACCGGCCTTCCTCAGCATCCACCGGTCAGGCCACCCCTCTT  
rabbit -----

human CCTGTCACCGACACTTCCTCAGTATCCACGGTCACGCCACGCCTTTCCTGTCACCAGC  
rabbit -----

human CTTTCCTCAGTATCCACAGGTGACACCACCCCTTTCCTGTCACCGACGCTTCCTCGGCA  
rabbit -----

human TCCACAGGTGAGGCCACCCCTTTCCTGTCACCAGCCTTTCCTCAGTATCCACAGGTGAC  
rabbit -----

human ACCACCCCTTTCCTGTCACCGACGCTTCCTCAGTATCCACAGGTGAGGCCACCCCTT  
rabbit -----

human CCTGTCACCGACACTTCCTCAGCATCCACAGGTGACACCACCCGTTCCTGTCACGGAC  
rabbit -----

human ACTTCCTCAGCATCCACAGGTGAGGCCACCCCTTTCCTGTCACCAGCCTTTCCTCAGTA  
rabbit -----

human TCCACAGGTGACACCACCCCTTTCCTGTCACCGACGCTTCCTCAGTATCCACAGGTGAC  
rabbit -----

human GCCACCCCTTTCCTGTCACCGACACTTCCTCAGCATCCACAGGTGACACCACCCGTCTT  
rabbit -----

human CCTGTCACGGACACTTCCTCAGCATCCACAGGTGAGGCCACCCCTTTCCTGTCACCATC  
rabbit -----

human CCTTCCTCATCATCCTCAGGTCACACCACCCCTCTTCCTGTCACCAGCACTTCCTCAGTA  
rabbit -----

human TCTACAGGTCAGGTCACCCCTCTTCATGTCACCAGCCCTTCCTCAGCATCCACAGGTCAC  
rabbit -----

human GTCACCCCTCTTCCTGTCACCAGCACTTCCTCAGCATCCACAGGTCAGGCCACCCCTCTT  
rabbit -----

human CTTGTCACCGACGCTTCCTCAGTGTCCACAGGTCAGGCCACGCCCTCTTCCTGTCACCGAC  
rabbit -----

human GCTTCCTCAGCATCCACAGGTGACACCACCCCTCTTCCTGTCACCGACACTTCCTCAGCA  
rabbit -----

human TCCACAGGTCAGGCCACCCCTCTTCCTGTCACCAGCCCTTCCTCAGTATCCACAGGTGAC  
rabbit -----

human ACCACCCCTCTTCCTGTCACCGACGCTTCCTCAGCATCCACAGGTCAGGCCACCCCTCTT  
rabbit -----

human CCTGTCACCATCCCTTCCTCAGTATCCACAGGTGACACCATGCCTCTTCCTGTCAGTAGC  
rabbit -----

human CCTTCCTCAGCATCCACAGGTCAGGCCACCCCTCTTCCTGTTACCGGCCCTTCCTCAGCT  
rabbit -----

human TCCACAGGTGACACCACCCTCTTCTGTACCGACACTTCCTCAGCATCCACAGTCAC  
rabbit -----

human GCCACCCCTCTTCTGTACCGACACTTCCTCAGCTTCCACAGATGACACCACCGTCTT  
rabbit -----

human CCTGTCACCGACGTTTCTCGGCATCCACAGGACATGCCACCCCTCTTCTGTACCCAGC  
rabbit -----

human ACTTCTCAGCATCCACAGGTGACACCACCCTCTTCTGTACCGACACTTCCTCAGTA  
rabbit -----

human TCCACAGGTCACGCCACCTCTTCTGTACCCAGCGTTCTCAGCATCCACAGGTCAC  
rabbit -----

human GCCACCCCTCTTCTGTACCGACACTTCCTCAGTATCCACAGGTCAGGCCACCCTCTT  
rabbit -----

human CCTGTCACCAGCACTTCCTCAGTATCTACAGGTCACGCCACCCTCTTCTGTACCCAGC  
rabbit -----

human CCTTCTCAGCATCCACAGGTCAGGCCACCCTGTTCTGTACCCAGCACTTCCTCAGCA  
rabbit -----

human TCCACAGGTGACACCACCCTCTTCTGTACCAATGCTTCTCATTATCCACAGGTCAC  
rabbit -----

human GCCACCCCTCTTCATGTCACCAGCCCTTCCTCAGCATCCAGAGGTGACACCAGCACTCTT  
rabbit -----

human CCTGTCACCGATGCTTCCTCAGCATCCACGGTCACGCCACCCCTCTTCCTCTCACCAGC  
rabbit -----

human CTTTCCTCAGTATCCACAGGTGACACCAGCCTCTTCCTGTCACCGACACTTCCTCTGCA  
rabbit -----

human TCCACAGGTGAGGCCACCCCTCTTCCTGTCACCAGCCTTCCTCAGTATCCACAGGTGAC  
rabbit -----

human ACCAGCCTCTTCCTGTCACCATCCCTTCCTCAGCATCCTCAGGTGACACCACCTCTCTT  
rabbit -----

human CCTGTCACCGACGCTTCCTCAGTGTCCACAGGTGACGCCACCCCTCTTCCTGTCACCAGC  
rabbit -----

human ACTTCCTCAGCATCCACAGGTGACACCACCCCTCTTCCTGTCACCGACACTTCCTCAGCA  
rabbit -----

human TCCACAGGTGACGCCACCCCTCTTCCTGTCACCGACACTTCCTCAGCATCCACAGGTGAC  
rabbit -----

human GCCACCCCTCTTCCTGTCACCAGCCTTCCTCAGTATCCACAGGTGACGCCACCCCTCTT  
rabbit -----



human GCTGTCAGCAGTGCTACCTCAGCTTCCACAGTATCCTCGGACTCCCCTCTGAAGATGGAA  
rabbit -----CATCTTTGGGCTCCACAACGAAGACCGAA  
\*\*\* \* \*\*.\*\*\*\*.\*:.\*\*\*\* \*\*

human ACACCAGGAATGACAACACCGTCACTGAAGACAGACGGTGGGAGACGCACAGCCACATCA  
rabbit ACATCAGGAATGATCCCAACCTCACTGTGGATAAATGGTGGGAGAAGCACAGCACTGTCA  
\*\*\* \*\*\*\*\* . .\* \* \*\*\*\*\*:.\* \*.\* \*\*\*\*\*.\*\*\*\*\*\*. . \*\*\*

human CCACCCCAACAACCTCCCAGACCATCATTTCCACCATTCCCAGCACTGCCATGCACACC  
rabbit CCGCCCTCAACAACCTCCCTGACCCCTACGAACTCCACGCCACCACATCCACAGGCTTC  
\*.\*\*\*\* \*.\*\*\*\*\*\*.\*\*\*\*\*. \* :.\*:\*\*\* \*\*\*\* \*\*\*:\*\*\* . .\*: \*

human CGCTCCACAGCTGCCCCATCCCATCCTGCCTG-----AGAGAGGAGTTCCCTC  
rabbit CGTTCAACAACCTCCCTCTGTCCCGTCCAGCAGGACAAGCGGGCCAGGCGTCTCCCTC  
\*\* \*\*.\*\*\*.\* \*\* \* .\*\*\*\*\*.\*\*\*:\* \* . . \*\*.\* \*\* \*\*\*\*\*

human TTCCCTATGGGGCAGGCGCCGGGACCTGGAGTTCGTCAGGAGGACCGTGGACTTCACC  
rabbit TTTCCCTACGGGTCCAGCGTTGGAGACACGCCGTTTCGTCAGGAGGACAGTGGACTTCACC  
\*\* \*\*\*\*\* \*\* \* . \*\*\* \*\*.\*\*\*.\* \* .\*\*\*\*\*.\*\*\*\*\*\*.\*\*\*\*\*\*

human TCCCCTCTTCAAGCCGGGACTGGCTTCCCCTTGGCTCCTCTCTCCGTGATTCCCTC  
rabbit TCTCAGCTCTTCAAGCCCGCATTGGCTTCCCCTGGGCTCCTTCTGCGAGATTCCCTC  
\*\* \* .\*\*\*\*\* \* \*\*\*\*\* \*\*\*\*\* \*\* \*\*.\*\*\*\*\*\*

human TACTTCACAGACAATGGCCAGATCATCTTCCAGAGTCAGACTACCAGATTTTCTCCTAC  
rabbit TACTTCACAGACAACGGCCAGATCATCTTCCGGAGTCAGACAGCCAGATCTTCTCCTAC  
\*\*\*\*\*.\*\*\*\*\*\*.\*\*\*\*\*\*.\*\*\*\*\*\*.\*\*\*\*\*\*

human CCCAACCCACTCCAACAGGCTTACAGGCCGGGACCCTGTGGCCCTGGTGGCTCCGTTCC  
rabbit CCCAATCCGCCTCGGCGAGGCTTACAGCTTGGGACCCCGTGGCCGTGGTGGCTCCCTTC  
\*\*\*\*\* \*\*.\* \* . \*\*\*\*\* \*\*\*\*\* \*\*\*\*\* \*\*\*\*\* \*\*

human TGGGACGATGCTGACTTCTCCACTGGTGGGGACCACATTTTATCAGGAATACGAGACG  
rabbit TGGGACGATGCTGACTTCTCCATCCGTGGGGAACCATATTTTACCAGGAATATGAGACA  
\*\*\*\*\*.\*\*\*\*\*\*.\*\*\*\*\*\*.\*\*\*\*\*\*.\*\*\*\*\*\*

human TTCTATGGTGAACACAGCCTGCTAGTCCAGCAGGCCGAGTCTTGGATTAGAAAGATGACA  
 rabbit TTCTATAATGAACACAACCCGCTAGTCTGGCAGGTGGAGTCTTGGATTGCCAGTGGAC  
 \*\*\*\*\*.\*\*\*\*\*.\* \*\*\*\*\* .\*\*\*\*\* \*\*\*\*\*\*\*\*\*\*.\*.....\*\*...

human AACACGGGGGCTACAAGGCCAGGTGGGCCCTAAAGGTCACGTGGTCAATGCCACGCC  
 rabbit CTTTGGGGTGAGTGGACCCATAGCAGCTCCCCTGGAGTGACCTGG----GAATCCCAGCA  
 .: :. \*\* \*. \*. \* . \*\* :\* \*\*\* :...\* \*\* \*\* \* .: .\*\*..\*\*

human TATCCTGCCAGTGGACCCTGGGAG-----CAACACCTACCAAGCCATCCTCTCCAC  
 rabbit TTTGAAGCCAGGTGGACCAGGAACAGGTGATACCTGCACCTACCAGGCCATCCTCTCCAC  
 \*:\* .:\*\*\*.\*\*\*\*\*. .. \*\* \*:.\*\*\*\*\*.\*\*\*\*\*

human GGACGGGAGCAGTGCCTATGCCCTGTTTCTCTACCAGAGCGGTGGATGCAGTGGGACGT  
 rabbit CGACGGGAGCAGTGCCTACGCACTGTTTCTTTACCAGGCAATGGGATGCAGTGGGATGT  
 \*\*\*\*\* \*\*\*\*\* \*.\*\*\*\*\* \*\*\*\*\*.\*\*\*\*\*

human GGCCAGCGCTCAGGCAACCCGGTGCCTCATGGGCTTCTCTAGTGGAGATGGCTATTTGAA  
 rabbit AGCCAGCGCCAGGCAACTCGGTCCCTCATGGGCTTCTCCAGTGCAGACGGGTATTTGCA  
 .\*\*\*\*\* \*\*\*\*\* \*\*\*\*\* \*\*\*\*\* \*\*\*\*\* \*\* \*\* \* \*\* \* .

human AACAGCCCACTGATGTCCAGCCAGTGTGGGAGAGGTATCGCCCTGATAGATTCCTGAA  
 rabbit CAACAGCCCGCTGATTTCCGGCCAGTGTGGGAGAGATATCGTCCGACCGATGGCTGAA  
 .\*\*\*\*\*.\*\*\*\*\* \*\*\*\*\*.\*\*\*\*\* \*\*\*\*\* \*\* \*\* .\*\* \*\*\*\*\*

human TTCCAACCTCAGGCCTCAAGGGCTGCAGTTCTACAGGCTACACGGGAAGAAAGGCCAA  
 rabbit TTCCAACCTAGGCCTCCGGGGCTGCAGATCTACAGGCTCCACAGGAGGCGATACCCAA  
 \*\*\*\*\*. \*\*\*\*\*. \*\*\*\*\*:\*\*\*\*\*.\*\*\*.\*\*\*.\*.\*.\*\*\*\*\*

human CTACCGTCTCGAGTGCCTGCAGTGGCTGAAGAGCCAGCCTCGGTGGCCAGCTGGGGCTG  
 rabbit CTACTATCTCAAGTGCAGCA-----  
 \*\*\*\* .\*\*\*.\*\*\*\*\*:\*\*\*

human GAACCAGGTCTCCTGCCCTTGTTCCTGGCAGCAGGGACGACGGGACTTACGATTCCAACC  
 rabbit -----CCCTTGCACCTGGCAGCAGGGACGATGGGACTTACGATTCCGGCC  
 \*\*\*\*\* :\*\*\*\*\* \*\*\*\*\*. \*\*

human CGTCAGCATAGGTCGCTGGGGCCTCG---GCAGTAGGCAGCTGTGCAGCTTCACCTCTTG  
rabbit TGTGGGCTCAGGCTGGTGGGGCCATGGCGGGCCGGAAGCTGTGCCGCTTCTCCTCCTG  
\*\* .\*\* : \*\* \* \*\*\*\*\* : \* \*\* . \* . \*\* . \*\*\*\*\* . \*\*\*\*\* : \*\*\*\*\* \*\*

human GCGAGGAGGCGTGTGCTGCAGCTACGGGCCCTGGGGAGAGTTTCGTGAAGGCTGGCACGT  
rabbit GCAAGGAGGCGTGTGCTGCAGCTACGGGCCCTGGGGAGAGCTTCGCGAAGGCTGGGGAGT  
\* . \*\*\*\*\* \*\*\*\*\* \*\*\*\*\* \*\*\*\*\* \*\*\*\*\* . . \*\*

human GCAGCGTCCTTGGCAGTTGGCCAGGAACTGGAGCCACAGAGCTGGTGTGCCGCTGGAA  
rabbit GGACAGTCCTTGGCACTTTGAGCAGGAACTGGAGGCGCAGAACTGGTGTGCCGCTGGAA  
\* \* . \*\*\*\*\* \*\* \* . \*\*\*\*\* \* . \*\*\*\* . \*\*\*\*\* \*\*\*\*\*

human TGACAAGCCCTACCTCTGTGCCCTGTACCAGCAGAGGGGCCACAGTGGGCTGTGCTAC  
rabbit CGACAAGCCCTCCTTCTGCTCGCTGTACAAGCGGAGGGCGGCCCGTCAGCTGTGCCGG  
\*\*\*\*\* . \* \*\*\*\* \* \*\*\*\*\* . \*\*\*\* . \*\*\*\*\* \* . \*\*\* . \*\*\*\*\* .

human ATACAGGCCCCACAGCCCGCTGGATGTTGGGGACCCACATCACCACCTTGATGG  
rabbit ATACAGGCCCTCCAGCCGGTTGGATGTTTGGGGACCCACATCACCACCTTGATGG  
\*\*\*\*\* \* . . \*\* \* \*\*\*\*\* \*\*\*\*\* \*\*\*\*\* \*\*\*\*\*

human TGTCA GTTACACCTTCAATGGGCTGGGGACTTCTGCTGGTCCGGGCCAAGACGGGAA  
rabbit CGCCAATTTACCTTCAATGGTCTGGGGACTTCTGCTGGTCCGGGCCCTGGGACGGGAA  
\* \*\* . \*\* : \*\*\*\*\* \*\*\*\*\* \*\*\*\*\* . . \*\*\*\*\*

human CTCCTCCTTCTGCTTCAAGGCCGACCGCCAGACTGGCTCAGCCAGGCCACCAACTT  
rabbit CTCCTCCTTCTGCTGCAAGGCCGCACTGCCAGACCGGCTCCGCCAGGCCACCAACTT  
\*\*\*\*\* \*\*\*\*\* . \*\*\*\*\* \*\*\*\*\* \*\*\*\*\* . \*\*\*\*\* \*\*\*\*\*

human CATCGCCTTTGCGGCTCAGTACCGCTCCAGCAGCCTGGGCCCGTCACGGTCCAATGGCT  
rabbit CATTGCCTTTGCAGCTCAGTATGAGTCCAGCAGCCTGGCCCCATCAGGTTCAATGGTT  
\*\* \*\*\*\*\* . \*\*\*\*\* . \*\*\*\*\* \*\*\*\*\* \*\*\*\*\* \*\*\*\*\* \*

human CCTTGAGCCTCAGGACGCAATCCGTGTCTGCTGGATAACCAGACTGTGACATTTAGCC  
rabbit CCTGGAGCCCAATGACACAATCCGTGTGCTGCACAATAACCAGACTGTGACATTTGAAAC  
\*\* \*\*\*\*\* . \* \*\* . \*\*\*\*\* \*\*\*\*\* : . \*\*\*\*\* \*\*\*\*\* \* . \*

human TGACCATGAAGACGGCGGAGGCCAGGAGACGTTCAACGCCACCGGAGTCCTCCTGAGCCG  
rabbit CGACCTTGAAGATGCAGAAGGCCAGGAGATTTTCAACACCACCGGGGTGCTGCTGACCCG  
\*\*\*:\*\*\* \* . \*,\*\*\*\*\* \*\*\*\*\*.\*\*\*\*\*. \*\* \*\* \*\*\* \*\*

human CAACGGCTCTGAGGTCTCGGCCAGCTTCGACGGCTGGGCCACCGTCTCGGTGATCGCGCT  
rabbit CAACGGCTCTCAGGTCTCAGCCAGCTTTGATGGCACGGTGGCCATCTCGGTGATGGCTGT  
\*\*\*\*\* \*\*\*\*\*.\*\*\*\*\* \*\* \*\*\*: \*\* .\*,\*\*\*\*\* \*\* \*

human CTCCAACATCCTCCACGCCTCGCCAGCCTCCGCCCCGAGTACCAGAACCGCACGGAGGG  
rabbit CTCCCACCTCCTCCACGCCTCCTCCAGCCTCCAGAGGAGTACCAGGGCCGCACGGAGGG  
\*\*\*. \*\*,\*\*\*\*\* \*\*\*\*\*. . \*\*\*\*\*. \*\*\*\*\*

human GCTCCTGGGGTCTGGAATAACAATCCAGAGGACGACTTCAGGATGCCAATGGCTCCAC  
rabbit CCTCCTGGGGTCTGGAACAACAATCCGATGATGACTTCGGATGCCAATGGCACTTC  
\*\*\*\*\* \*\*\*\*\*. \*\* \*\* \*\*\*\*\*.\*\*\*\*\*: \* :\*

human CATTCCCCAGGGAGCCCTGAGGAGATGCTTTTCCACTTTGGAATGACCTGGCAGATCAA  
rabbit CGTGGCCCGGGGAGCTCCGAGGAGCAGCTTTTCCACTATGGGATGACCTGGAAGCTCAA  
\* \* \*\*\* .\*\*\*\*\* \* \*\*\*\*\*. :\*\*\*\*\*:\*\*\*.\*\*\*\*\*. \*\*, \*\*\*\*

human CGGGACAGGCCTCCTTGCCAAGAGGAATGACCAGCTGCCTTCCAACCTCACCCTGTTTT  
rabbit CGGGACAGGCCTCCTTGCCAGAGGGACGACCAGCTGCCTCCACCTCACCCTGTCTT  
\*\*\*\*\*\*\*\*\*\*.\*\*\*\*\*. \* \*\*\*\*\* \*\*\*,\*\*\*\*\* \*\*

human CTA CTCAACTGCAAAAAACAGCTCCTGGGCTGAACATTTGATCTCCA ACTGTGACGG  
rabbit CTTCTCCA ACTGCTGGACAACAGCTCTGGGACCCGGCTCTGGTCTCTGGGTGCAGTGG  
\*\*:\*\*.\*\*\*\*\*: .\*,\*\*\*\*\* \*\*\*, . . \* \*\*,\* \*\* . \* . \*\*

human AGATAGCTCATGCATCTATGACACCCTGGCCCTGCGCAACGCAAGCATCGGACTTCACAC  
rabbit AGACAGACAATGCATCTATGACGCCCTGGCCATGCGAGACGCCGGTGCAGGCATCCACAC  
\*\* \*\* .\*\*\*\*\*.\*\*\*\*\*.\*\*\*.\*\*\*\*. \* . .\*\* . \* \*\*\*\*\*

human GAGGGAAGTCAGTAAAACTACGAGCAGGCGAACGCCACCCTCAATCAGTACCCGCCCTC  
rabbit CAGGACACTGTTTAGAACGTACCGGCAGATGAACGCCACCCAGAATCAGTCCCGCCCTC  
\*\*\*. \* \* : \*\*, \*\* ,\*\*\* .\*\*\*\*. \*\*\*\*\*: \*\*\*\*\*:\*\*\*\*\*

human CATCAATGGTGGTTCGTGTGATTGAAGCCTACAAGGGGCAGACCACGCTGATTGATTACAC  
rabbit CATCAAGGGCGAGCATGTGATTTGCGCCTATAAGGGGAAGAGCGTGTGGATTCCGTACAC  
\*\*\*\*\* \*\* \*, \*. \*\*\*\*\* .. \*\*\*\*\* \*\*\*\*\* .\*\*\* \* . \* \*\*\*\*\*. \*\*\*\*\*

human CAGCAATGCTGAGGATGCCAACTTCACGCTCAGAGACAGCTGCACCGACTTGGAGCTCTT  
rabbit CAGCGACTCGGAGAATGTCGTGTTACGCTCAGAAACAACCTGCACTGACATCAAGCTCTT  
\*\*\*. \* \* \*\* .\*\*\* \* . : \*\*\*\*\*.\*\*\*. \*\*\*\*\* \*\*.\* .\*\*\*\*\*

human TGAGAATGGGACGTTGCTGTGGACACCCAAGTCGCTGGAGCCATTCACTCTGGAGATTCT  
rabbit CGAGAATGGCACATTGCTGTGGACCCGAAGTCACTGGAACCGTTCACTCTGGAGATCCT  
\*\*\*\*\* \*. \*\*\*\*\*. \* \*\*\*\*\*. \*\*\*\*\*. \*\*. \*\*\*\*\*

human AGCAAGAAGTCCAAGATTGGCTTGGCATCTGCACTCCAGCCCAGGACTGTGGTCTGCCA  
rabbit AGTGAGAAGCACCAAGACGGGCTCTCGTCTGCCTCCAGCCCAGACCGTGTCTGCGC  
\* . \*\*\*\*\* . \*\*\*\*\* \*\* \* \* .\*\*\*\*\*. \*\*\*\*\*. \*\* \*\* \*\*\*\*\* .

human TTGCAATGCAGAGAGCCAGTGTGTTGTACAATCAGACCAGCAGGGTGGGCAACTCCTCCCT  
rabbit ATGCAGTGCAGAGAGCCAGTGTCTGTACAACCAGACCAGCTGGGTGGGCAATCCTCCCT  
:\*\*\*. \*\*\*\*\* \*\*\*\*\* \*\*\*\*\* \*\*\*\*\* \*\*\*\*\* \*\*\*\*\*

human GGAGGTGGCTGGCTGCAAGTGTGACGGGGCACCTTCGGCCGCTACTGCGAGGGCTCCGA  
rabbit CCAGGTGGCTGACTGCAAGTGTGATGGGACACCTTTCGGCCGCTTCTGTGAGCGCTCCAA  
\*\*\*\*\* . \*\*\*\*\* \*\*\*\*\* .\*\*\*. \*\*\*\*\* \*\*\*\*\* .\*\*\* \*\* \*\*\*\*\*. \*

human GGATGCCTGTGAGGAGCCGTGCTTCCCGAGTGTCCACTGCGTTCCTGGGAAGGGCTGCGA  
rabbit GGACCCCTGTGAGGAGGAGTGTCTCCCTGGCGTGAGCTGCGTTCCTGAGCGAGGCTGCGA  
\*\*\* \*\*\*\*\* . \*\*\*\*\* . \* \*\* .. \*\*\*\*\* . \* .. \*\*\*\*\*

human GGCCTGCCCTCCAAACCTGACTGGGGATGGGCGGCACTGTGCGGCTCTGGGAGCTCTTT  
rabbit GGCCTGCCCCATAGACATGACCGGAGACGGGCGGCACTGTGCAGCCCTGGAGAACTCCGA  
\*\*\*\*\* . \*. \*\* .\*\*\* \*\* . \* \*\*\*\*\*. \* \*\*\*\*\*. \*\* .\*\*\* :

human CCTGTGTCAGAACCAGTCTGCCCTGTGAATTACTGCTACAATCAAGGCCACTGCTACAT  
rabbit CCTCTGTCAGAACCCTCTGCCCTGTGAATTACTGCCACAACCAGGGCCACTGCTACAT  
\*\*\* \*\*\*\*\* \*\* \*\*\*\*\* \*\*\*\*\* \*\* .\*\*\*\*\*

human CTCCAGACTCTGGGCTGTGACCCATGTGCACCTGCCCCCAGCCTTCACTGACAGCCG  
rabbit TGCCCCGACGCTGAGCTGCCAGCCCTCCTGCACCTGCCCCCAGCCTTCACTGACGCCCC  
\*\*\*.\*\*\* \*\*\*.\*\*\*\* \*\*\*\*\*: \*\*\*\*\*.\*\*\*

human CTGCTTCCTGGCTGGGAACAACCTTCAGTCCAACCTGCAACCTAGAACTTCCCTTAAGAGT  
rabbit CTGCTTCCTGGCTGGGAATAGCTTCACTCCAACCACCCATCAAGAGCTTCCCTTAAGAAC  
\*\*\*\*\* \* .\*\*\*\*\* \*\*\*\*\* . \* . \* \* :\*\*\*.\*\*\*\*\*.

human CATCCAGCTCTTGCTCAGTGAAGAGGAAAATGCCTCCATGGCAGAAGTCAACGCCTCGGT  
rabbit CATCCAGCTCTTGCTCATCGAAGATGAAAATGCCTCCGTAGCAGAGGTCAACGCCTCGGT  
\*\*\*\*\* \*\*\*\*\* \*\*\*\*\* \* .\*\*\*\*\*.\*\*\*\*\*

human GGCATACAGACTGGGGACCCTGGACATGCGGGCCTTCTCCGCAACAGCCAAGTGAACG  
rabbit GGCCTACAGGCTGGGGACCCTGGACGTGCGTGCCTTCTCTGGAACAGCCTAGTGAAC  
\*\*\*.\*\*\*\*\*.\*\*\*\*\*.\*\*\* \*\*\*\*\* \* \*\*\*\*\*:\*\*\*\*\*

human AATCGATTCTGCAGCACCAGCCTCGGGAAGCCCCATCCAACACTGGATGGTCATCTCGGA  
rabbit AATCGCCTCTCCGGCCCCGGCTCGGGAAGCCTCATTACGCGCTGGAAGGTCACCTCGCA  
\*\*\*\*\*. \*\*\* \* .\*\*.\* \* \*\*\*\*\* \*\*\*\*\* \*\* \* . \* .\*\*\*\*\*:\*\*\*\*\* \*\*\*\*\* \*

human GTTCCAGTACCGCCTCGGGGCCCGTATTGACTTCCTGAACAACCAGCTGCTGGCCG  
rabbit TTTCCAGTACCGCCTCAGGGCCCTGTATCGACTTCCTCAACAACCGGCTTACAGGAGGC  
\*\*\*\*\* \*\*\*\*\* \*\*\*\*\* \*\*\*\*\* \*\*\*\*\* .\*\*\* \* :\*\* .\*\*

human GGTGGTGGAGGCGTTCTTATACCACGTTCCACGGAGGAG-----TGAGGAGCC  
rabbit AGTGGTGCAGGCCTTCTTCTGCAGGCTCAGAGGAGGAGGTGGAAGAGGAGCGAGGGGCC  
.\*\*\*\*\* \*\*\*\*\* \*\*\*\*\* . : \*\* \* \*\* . .\*\*\*\*\* \*\*\*\*\*.\*\*\*

human CAGGAACGACGTGGTCTTCCAGCCATCTCCGGGAAGACGTGCGGATGTGACAGCCCT  
rabbit CAGGAACAACGTGCTCTTCTACCCATCTCAAGGGTGGACGTGCATGATCTCGCAGCGCT  
\*\*\*\*\*.\*\*\*\*\* \*\*\*\*\* \* \*\*\*\*\* .\*\*\*:\*\*\*\*\*. \*\*\* \* .\*\*\*\* \*\*

human GAACGTGAGCAGGCTGAAGGCTTACTTCAGATGCGATGGCTACAAGGGCTACGACCTGGT  
rabbit GAATGTGAGCAGGCTGGAGACATACCTCAAATGCAATGGCTACGAGGGCTACCACCTGAT  
\*\*\* \*\*\*\*\* .\*\*.\*:\*\*\* \*\*\*.\*\*\*\*.\*\*\*\*\*.\*\*\*\*\* \*\*\*\*\*. \*

human CTACAGCCCCAGAGCGGCTTCACCTGCGTGTCCCCGTGCAGTAGGGGCTACTGTGACCA  
rabbit CTACGGCCCCAGAGCGGCTTCACCTGCACGTCCCCGTGCACCGAGGGCTACTGTGACCA  
\*\*\*.\*\*\*\*\*.\*\*\*\*\* ..\*\*\*\*\*

human TGGAGGCCAGTGCCAGCACCTGCCAGTGGGCCCCGTGCAGCTGTGTGTCCTTCTCCAT  
rabbit CG-AGGCCAGTGCCAGCACTGCCTGA-----  
\* \*\*\*\*\* \* \*

human CTACACGGCCTGGGGCGAGCACTGTGAGCACCTGAGCATGAAACTCGACGCGTTCTTCGG  
rabbit -----

human CATCTTCTTTGGGGCCCTGGGGCCCTTTGCTGCTGGGGTTCGGGACGTTTCGTGGTCT  
rabbit -----

human GCGCTTCTGGGGTTGCTCCGGGGCCAGGTTCTCCTATTTCTGAACTCAGCTGAGGCCTT  
rabbit -----

human GCCTTGAAGGGCAGCTGTGGCCTAGGCTACCTCAAGACTCACCTCATCCTTACCGCACA  
rabbit -----

human TTTAAGGCGCCATTGCTTTTGGGAGACTGGAAAAGGAAGGTGACTGAAGGCTGTCAGGA  
rabbit -----

human TTCTTCAAGGAGAATGAATACTGGGAATCAAGACAAGACTATACCTTATCCATAGGCGCA  
rabbit -----

human GGTGCACAGGGGAGGCCATAAAGATCAAACATGCATGGATGGGTCTCACGCAGACACA  
rabbit -----

human            CCCACAGAAGGACACTAGCCTGTGCACGCGCGCGTGCACACACACACACACACAGGAG  
rabbit            -----

human            TTCATAATGTGGTGATGGCCCTAAGTTAAGCAAAATGCTTCTGCACACAAAACCTCTCTGG  
rabbit            -----

human            TTTACTTCAAATTAACCTCTATTTAAATAAAGTCTCTCTGACTTTTTGTGTCTCCAAAAAA  
rabbit            -----

human            AAAAAAAAAA  
rabbit            -----

Underline fields are primer sequences we used.



**Supplemental Information 3.**

CLUSTAL 2.1 multiple sequence alignment

**Muc5ac**

|        |                                                              |
|--------|--------------------------------------------------------------|
| human  | GGGCACTCTTCCCGCCGTCCACACAATGAGTGTTGGCCGGAGGAAGCTGGCCCTGCTCT  |
| rabbit | -----                                                        |
| human  | GGGCCCTGGCTCTCGCTCTGGCCTGCACCCGGCACACAGGCCATGCCAGGATGGCTCCT  |
| rabbit | -----                                                        |
| human  | CCGAATCCAGCTACAAGCACCACCTGCCCTCTCTCCTATCGCCCGGGGCCAGCGGGG    |
| rabbit | -----                                                        |
| human  | TCCCGCTCCGTGGGGCGACTGTCTTCCCATCTCTGAGGACCATCCCTGTGGTACGAGCCT |
| rabbit | -----CCTCCAATGGCCGCGG----TTGCTTCGGCCACAGCCC                  |
|        | * ** * * * * * * * * * * * * * * *                           |
| human  | CCAACCCGGCGCACAACGGGCGGTGTGCAGCACCTGGGGCAGTTCCAACAAGACCT     |
| rabbit | CGGACCCCGTGCACAACGGCCGGTGTGCAGCACCTGGGGCGACTTCCAACAAGACCT    |
|        | * **** * ***** ***** ***** ***** *****                       |
| human  | TCGACGGCGACGTCTTCCGCTTCCCGGCCTCTGCAACTACGTGTTCTCCGAGCACTGCG  |
| rabbit | TCGACGGCGCCGTCTTCCGCTTCCCGGCCTCTGCAACTACGTGTTCTGCGCACTGCG    |
|        | ***** ***** ***** ***** * *****                              |
| human  | GTGCCGCTACGAGGATTTAACATCCAGCTACGCCGAGCCAGGAGTCAGCGGCCCCA     |
| rabbit | GCGGCGCCTACGAGGACTTCAACGTGCAGCTGCGGCGCAGCCGAGGACGGCGCTGTGG   |
|        | * * ***** * * * * * * * * * * * * * * *                      |
| human  | CGCTGAGCAGGTCCTCATGAAGGTGGATGGCGTGGTCATCCAGCTGACCAAGGCTCCG   |
| rabbit | CCCCGAGCAGGTCATCATGAAGTGGAGGCCTGGTGGTCGAGCTCACCAGTCACTCCG    |
|        | * * ***** ***** * * * * * * * * * * * * * * *                |

human TCCTGGTCAACGGCCACCCGGTCTGCTGCCCTTCAGCCAGTCTGGGGTCTCATTGAGC  
rabbit TCCTGGTCAGCGGCCGCCGGTGCAGCTGCCCTTCAGCCAGGCGGGGTTTCATAGAGC  
\*\*\*\*\* \*\*\*\*\* \* \*\*\*\*\* \* \*\*\*\*\* \*  
human AGAGCAGCAGCTACACCAAGGTGGAGGCCAGGCTGGGCCTTGCCTCATGTGGAACCAGC  
rabbit GCAGCAGCAGCTCCCTGAAGGTGGTGGCCAAGCTGGGCCTGGTCTTCATGTGGAACCAGG  
\*\*\*\*\* \* \*\*\*\*\* \*\*\*\*\* \* \*\*\*\*\* \*  
human ATGACAGCCTGCTGCTGGAGCTGGACACCAATACGCCAACAAGACCTGTGGGCTCTGTG  
rabbit ACGACAGCCTCCTGCTGGAGCTGGACTCCAAGTTCGCCAACCAGACCTGCGGGCTCTGTG  
\* \*\*\*\*\* \*\*\*\*\* \*\*\*\*\* \* \*\*\*\*\* \*\*\*\*\*  
human GGGACTTCAACGGGATGCCCGTGGTCAGCGAGCTCCTCTCCACAACACCAAGCTGACAC  
rabbit GAGACTTCAACGGCATCCCCGGTCCAGCGAGTTCCTGTCCACAACACCAGGCTGACCC  
\* \*\*\*\*\* \*\* \*\*\*\*\* \* \*\*\*\*\* \*\*\*\*\* \*  
human CCATGGAATTCGGAACCTGCAGAAGATGGACGACCCACGGAGCAGTGTGAGGACCCCTG  
rabbit CCGTGGAGTTCGGAACCTGCAGAAGCTGGATGGCCCCATGGAGCAGTGCAGGACCCGG  
\*\* \*\*\*\* \*\*\*\*\* \*\*\*\*\* \*\*\*\*\* \* \*\*\*\*\* \*\*\*\*\* \*  
human TCCCTGAACCCCGAGGAAGTCTCCACTGGCTTTGGCATCTGTGAGGAGCTCCTGCACG  
rabbit CCCCAGAAAACAAGAGGAAGTCTCCAC-AGCCCCGGT-----GAGCCCCTGCGTG  
\*\*\* \*\* \* \*\*\*\*\* \*\* \* \*\*\*\*\* \*  
human GCCAG--CTGTTCTCTGGCTGCGTGGCCCTGGTGGACGTGGCAGCTACCTGGAGGCTTG  
rabbit GAGGGGGCGGGCGGGGGTTGCGGGGACCCTACG-----CGG--GGTGCCTCGAG-CTTG  
\* \* \* \* \* \*\* \*\*\*\*\* \* \* \* \* \*  
human CAGGCAAGACCTCTGCTTCTGTGAAGACACCGACCTGCTCAGCTGCGTCTGCCACACCCT  
rabbit GACTCCAGAGC---GCTCCCGGGC----CGACCAGNCGACCT----CTGCCGT-----  
\* \* \*\*\* \* \*\*\* \* \* \* \*\*\*\*\* \* \* \* \*  
human TGCCGAGTACTCCCGCAGTGCACCCATGCAGGGGGT--TGCCCCAGGACTGGCGGGG  
rabbit ----GAGTGCCCCCGCCCGCCCAACCCGGCAGGCTGGCGGCCACGCCGGCGCAGC  
\*\*\*\* \* \*\*\* \*\* \*\* \* \* \* \* \* \* \* \* \* \* \* \* \* \*

human CCTGACTTCTGCCCCAGAAGTGCCCAACAACATGCAGTACCACGAGTGCCGCTCCCC  
rabbit CCTGAC-----GTGTCCCACGACATGGAATACCACGAGTGCCGCTCACC  
\*\*\*\*\* \*\* \*\* \* \*\*\*\*\* \* \*\*\*\*\*

human TGTGCAGACACCTGCTCCAACCAGGAGCACTCCCGGCCTGTGAGGACCACTGTGTGGCC  
rabbit TGCGCCGACACCTGCTCCAACCCCGAGCGCTCCAGCTCTGCGAGGACCACTGCGTGGCC  
\*\* \* \*\*\*\*\* \*\* \* \*\*\*\*\* \* \*\* \*\*\*\*\* \*\*\*\*\*

human GGCTGCTTCTGCCCTGAGGGGACGGTGCTTGACGACATCGGCCAGACCGGCTGTGTCCCT  
rabbit GGCTGCTTCTGCCCGAGGGGACGGTGCTGGACGACATCGGCCAGCCGGCTGTGTCCCC  
\*\*\*\*\* \*\*\*\*\* \*\*\*\*\* \*\*\*\*\*

human GTGTCAAAGTGTGCCTGCGTCTACAACGGGGCTGCCTATGCCCCAGGGGCCACCTACTCC  
rabbit GTGACCCAGTGCCTGCACCTACAACGGGGCCACCTACGCGTCAGGAGCCAAATACTCC  
\*\* \* \*\*\*\*\* \*\*\*\*\* \*\*\*\*\* \*\* \* \*\*\*\*\* \*\*\*\*\*

human ACAGACTGCACCAACTGCACCTGCTCCGGAGGCCGGTGGAGCTGCCAGGAGTTCCATGC  
rabbit ACAGACTGCACCGAGTGCACCTGCTCCGGAGGCCGGTGGAGCTGCCAGGACATCCCATGT  
\*\*\*\*\* \* \*\*\*\*\* \*\*\*\*\* \*\*\*\*\* \* \*\*\*\*\*

human CCGGTACCTGCTCTGTGCTTGGAGGTGCCCACTTCTCAACGTTTACGGGAAGCAATAC  
rabbit CCAGGCACCTGCTCGGTGCTGGGGGGCGCCCACTTCTCCACGTTGACGAGAGGCAGTAC  
\*\* \* \*\*\*\*\* \*\*\*\*\* \*\* \* \*\*\*\*\* \*\*\*\*\* \*\* \* \*\*\*\*\*

human ACGGTGCACGGGACTGCAGCTATGTGCTGACCAAGCCCTGTGACAGCAGTGCCTTCACT  
rabbit ACGGTGCACGGGACTGCAGCTACGTGCTGGCCAAGTCTGTAACAGCAGCACCTTCAAC  
\*\*\*\*\* \*\*\*\*\* \*\*\*\*\* \*\*\*\*\* \*\*\*\*\* \*\*\*\*\* \*\*\*\*\*

human GTACTGGCTGAGCTGCGCAGGTGCGGGCTGACGGACAGCGAGACCTGCCTGAAGAGCGTG  
rabbit GTGCTGGCGGAGCTGCGCAGGTGCGGGCTGACGGACAGCGAGACCTGCCTGAAGAGCGTG  
\*\* \*\*\*\*\* \*\*\*\*\*

human ACACTGAGCCTGGATGGGGTGCAGACGGTGGTGGTCAAGGCCAGTGGGAAGTGTTCC  
rabbit ACGCTGAACCTGGACGGGGGCGAGACGGTCGTGGTGGTCAAGGCCAGCGGGAGGTGTTT  
\*\* \*\*\*\*\* \*\*\*\*\* \*\*\*\*\* \*\*\*\*\* \*\*\*\*\* \*\*\*\*\* \*\*\*\*\*

human CTGAACCAGATCTACACCCAGCTGCCATCTCTGCAGCCAACGTACCATCTTCAGACCC  
rabbit GTGAACCATATCTACACCCAGCTGCCTGTCTCCGCAGGTGAG-----  
\*\*\*\*\* \*\*\*\*\* \*\*\*\*\* \*\*

human TCAACCTTCTTCATCATCGCCAGACCAGCCTGGGCCTGCAGCTGAACCTGCAGCTGGTG  
rabbit -----CTGGGCCTGCAGTTGGACATCCAGCTGGTG  
\*\*\*\*\* \*\* \* \*

human CCCACCATGCAGCTGTTTCATGCAGCTGGCGCCAAGCTCCGTGGGCAGACCTGCGGTCTC  
rabbit CCCACCATGCAGGTGGCTGTGAGGCTGGAGCCCGAGTTCAGGGCCGGACCTGCGGTCTC  
\*\*\*\*\* \*\* \* \*\*\*\*\*

human TGTGGAACTTCAACAGCATCCAGGCCGATGACTCCGGACCCTCAGTGGGGTGGTGGAG  
rabbit TGCGGGAATTTCAACCGCGTGCAGGCAGACGACTCCGGGCCATCAGCGGTGTGGTGGAG  
\*\* \*\*\*\*\* \*\* \* \*\*\*\*\* \*\* \*\*\*\*\* \*\* \*\*\*\*\*

human GCCACCGCTGCGGCCTTCTTCAACACCTTCAAGACCCAGGCCCTGCCCAACATCAGG  
rabbit GGCACGGCCGCGCCTTCTTCAACACCTTCAAGACCCATGCCTCCTGGCCCAACGTCAAG  
\* \*\* \* \* \*\*\*\*\* \*\*\*\*\* \*\*

human AACAGCTTCGAGGACCCCTGCTCTCTGAGCGTGGAGAATGAGAAGTATGCTCAGCACTGG  
rabbit AACAACTCGAGGACCCCTGCTCCCTCAGCGTGGAGAACGAGAAGTTTCCCAGCACTGG  
\*\*\* \*\*\*\*\* \*\* \*\*\*\*\* \*\*\*\*\* \*\* \*\*\*\*\*

human TGCTCGCAGCTGACCGATGCCGACGGCCCTTCGGCCGGTGCCATGCTGCCGTGAAGCCG  
rabbit TGCTCGCGGTGACAGACGCCAAGGCCCTTGGCCAGTGCCACTCCGCCGTGAGCCCT  
\*\*\*\*\* \*\*\*\*\* \*\* \* \*\*\*\*\* \* \*\* \*\*\*\*\* \* \*\*\*\*\* \*\*

human GGCACCTACTACTCGAACTGCATGTTTGACACCTGCAACTGTGAGCGGAGCGAGACTGC  
rabbit GGCACCTACCACTCGAACTGCCTGTTTGACACCTGCAACTGTGAGAAGACTGAGGACTGC  
\*\*\*\*\* \*\*\*\*\* \*\*\*\*\* \*\* \*\*\*\*\*

human CTGTGCGCCGCGCTGCCTCCTACGTGCACGCCTGTGCCGCCAAGGGCGTGCTGCTCGGC  
rabbit CTGTGTGCGCGCTGCCTCCTACGTGCACGCCTGTGCCGCCAAGGGCGTGCTGCTCGGT  
\*\*\*\*\* \*\* \*\*\*\*\* \*\*\*\*\* \*\*\*\*\* \*\*\*\*\* \*\*\*\*\* \*\* \*

human GGCTGGAGGGACGGCGTCTGCACGAAGCCTATGACCACTTGCCCCAAGTCAATGACGTAC  
rabbit GGCTGGCGGGACGGCGTCTGCACCAAGCACACGAGCAGCTGCCCAAGTCCATGACCTAC  
\*\*\*\*\*  
human CACTACCATGTCAGCACCTGCCAGCCCACCTGCCGCTCCCTGAGCGAGGGGGACATCACC  
rabbit CACTACCACATCAGCACCTGCCAGCCCACCTGCCGCGCCGGAGCGAGCCCGACCTCACC  
\*\*\*\*\*  
human TGCAGTGTGGCTTCATCCCCGTGGATGGCTGCATCTGTCCAAGGGCACCTTCCTGGAC  
rabbit TGCGGCGTCAGCTTCGTGCCGTGGACGGCTGCGCCTGCCCGAGGGCACCTTCCTGGAC  
\*\*\* \* \*\*  
human GACACGGGCAAGTGTGTGCAGGCCAGCAACTGTCCCTGCTACCACAGAGGCTCCATGATC  
rabbit GACGTGGGCAAGTGTGTGGAGGCCACCAGCTGTCCCTGCTACCACAGCGGCTCCGTGGTC  
\*\*\* \*\*\*\*\*  
human CCCAATGGGGAGTCGGTGCACGACAGCGGGCTATCTGCACCTGCACACATGGGAAGCTG  
rabbit CCCAACGGCGAGTCTGTGCATGACAGTGGGGCCGTCTGCACCTGCACACAGGGGACGCTG  
\*\*\*\*\*  
human AGCTGCATCGGAGGCCAAGCCCCGCCCAAGTGTGTGCTGCGCCATGGTGTCTTTGAC  
rabbit ACCTGCATTGGAGGCCAGCTCCGGCCCCAGTGTGTGACGCACCCATGGTCTTCTCGAC  
\* \*\*\*\*\*  
human TGCCGAAATGCCACGCCCGGGGACACAGGGGCTGGCTGTCAGAAGAGCTGCCACACACTG  
rabbit TGCCGCAACGCCACGGCCGGGGCCACGGGGGCTGGCTGTCAGAAGAGCTGTACACCCTG  
\*\*\*\*\*  
human GACATGACCTGTTACAGCCCCAGTGTGTGCCTGGCTGTGTGCCCCGATGGGCTGGTG  
rabbit GACATGGAGTGTACAGCTCCAGTGCCTGCCCGGCTGCGTGTGCCCGACGGGCTGGTG  
\*\*\*\*\*  
human GCGGATGGCGAGGGCGGCTGCATCACTGCGGAGGACTGCCCTGCGTGCACAATGAGGCC  
rabbit GCCGACGGCCTCGGCGGCTGCATCGCTGAGGAAGAATGTCCCTGTGTGCACAACGAGGCC  
\*\* \*\* \*\*

human AGCTACGGGCCGGCCAGACCATCCGGGTGGGCTGCAACACCTGCACCTGTGACAGCAGG  
rabbit AGCTACGGCCCCGGAGAGACCATCTGGACGGGTGCAACACCTGCACCTGTGAGAACAGG  
\*\*\*\*\* \* \*\*\*\* \*\*\*\*\* \*\* \*\*\* \*\*\*\*\* \* \*\*\*\*

human ATGTGGCGGTGCACAGATGACCCCTGCCTGGCCACCTGCGCCGTGTACGGGGACGGCCAC  
rabbit AAGTGGCGCTGCTCGGACGAGCCCTGCCTGGCCACCTGCGCCGTATACGGG-ACGGTCAC  
\* \*\*\*\*\* \*\* \* \*\* \* \*\*\*\*\* \*\*\*\*\* \*\*\*\*\* \*\*\* \*\*

human TACCTCACCTT-CGACGGACAGAGCTACAGCTTCAACGGAGACTGCGAGTACACGCTGGT  
rabbit TACTTCACCTTTGACGG---GGGCTACAGCTTCAGTGGTACTGCGAGTACACGCTGTT  
\*\*\* \*\*\*\*\* \*\*\*\*\* \* \*\*\*\*\* \*\* \*\*\*\*\* \*

human GCAGAACCCTGTGGCGGAAAGACAGCACCAGGACTCCTTTGTTGTACCGAGAA  
rabbit GCAGGACCAGTGGGTGGGAACGTCAGCGCCAGGACGCTTCCGCGTCGTACGGAGAA  
\*\*\*\*\* \*\*\*\* \* \*\* \*\*\*\*\* \* \*\*\*\*\* \*\*\*\*\* \*\* \* \*\*\*\*\* \*\*\*\*\*

human CGTCCCCTGCGGCACCACAGGGACCACCTGCTCCAAGGCCATCAAGATTTTCTGGGGG  
rabbit CGTCCCCTGCGGCACCACAGGGACCACCTGCTCCAAGGCCATCAAGATCTTCTGGGGAG  
\*\*\*\*\* \*\*\*\*\* \*

human CTTGAGCTGAAGCTAAGCCATGGGAAGGTGGAGGTGATCGGGACGGACGAGAGCCAGGA  
rabbit CTACGAGCTGAAGCTGAGTGACGGGAAGGTGGAGGTGGTGGAGAAAGGCAAGGGCCAGGA  
\*\* \*\*\*\*\* \* \* \*\*\*\*\* \* \* \* \* \* \*\*\*\*\*

human GGTGCCATACCCATCCGGCAGATGGGCATCTACCTGGTGGTGGACACCGACATTGGCCT  
rabbit GCCGCCCTACTCCATCCGCCAGATGGGCATCTTCTGGTGGTGGACACCGACGCTGGCCT  
\* \*\*\* \*\* \*\*\*\*\* \*\*\*\*\* \*\*\*\*\* \*\*\*\*\* \*\*\*\*\*

human GGTGCTGCTGTGGGACAAGAAGACCAGCATCTTCATCAACCTCAGCCCGAGTTCAAGGG  
rabbit GGTGCTGCTGTGGGACAGGAGGACCAGCCTCTTCTCAGGCTCAGCCCGAGTTCAAGGG  
\*\*\*\*\* \*\*\*\*\* \*\* \*\*\*\*\* \*\*\*\*\* \*\* \*\*\*\*\*

human CAGGGTCTGCGGCCTGTGTGGAACTTCGACGACATCGCCGTTAATGACTTTGCCACGCG  
rabbit CAGGGTCTGTGCCTGTGCGGAACTTCGACGACAACGCCATGAACGACTTCACCACGCG  
\*\*\*\*\* \*\*\*\*\* \*\*\*\*\* \*\*\*\*\* \* \* \*\*\*\*\* \*\*\*\*\*

human GAGCCGGTCTGTGGTGGGGACGTGCTGGAGTTTGGGAACAGCTGGAAGCTCTCCCCTC  
rabbit GAGCCAGTCGGTGGTGGGCGACGCGCTGGAGTTCGGGAACAGCTGGAAGTTCTCGCCATC  
\*\*\*\*\* \*\* \*\*\*\*\* \*\* \*\* \*\*\*\*\* \*\*\*\*\* \*\*\*\*\* \*\*\*\*\* \*\* \*\*

human CTGCCAGATGCCCTGGCGCCAAGGACCCCTGCACGGCCAACCCCTTCGCAAGTCCTG  
rabbit CTGCCGGACGCGCCGGCACCCAGGACTCCTGCGCCGCAACCCCTACCGCAAGTCCTG  
\*\*\*\*\* \*\* \* \* \*\* \*\*\*\*\* \*\*\*\*\* \*\*\*\*\* \* \*\*\*\*\* \*\*\*\*\*

human GGCCAGAAGCAGTGCAGCATCCTCCACGGCCCCACCTTCGCCGCTGCCACGCACACGT  
rabbit GGCCAGAAGCAGTGCAGCATCGTCCACAGCGCCACCTTCGCTGCCTGCCACGCCACGT  
\*\*\*\*\* \*\*\*\*\* \*\*\*\*\* \*\* \*\*\*\*\* \*\*\*\*\* \*\*\*\*\* \*\*\*\*\*

human GGAGCCGGCCAGTACTACGAGGCTGCGTGAACGACGCGTGCCTGCGACTCCGGGGG  
rabbit GGAGCCTGCCGAGTACTATGAGGCTGCGTGCAGGACGCTGCGCTGCGACTCGGGGGG  
\*\*\*\*\* \*\* \*\*\*\*\* \*\*\*\*\* \*\*\*\*\* \* \*\*\*\*\* \*\*\*\*\* \*\*\*\*\* \*\* \*\*

human TGA CTGCGAGTGCTTCTGCACGGCTGTGGCCGCTACGCCAGGCCTGCCATGAAGTAGG  
rabbit CGACTGCGAGTGCTTCTGCACGGCTGTGGCCGCTACGCCAGGCCTGCCACGAGGTGGG  
\*\*\*\*\* \*\*\*\*\* \*\*\*\*\* \*\*\*\*\* \*\*\*\*\* \*\*\*\*\* \*\* \*\* \*\*

human CCTGTGTGTCTGCGGACCCGAGCATCTGCCCTCTGTTCTGCGACTACTACAACCC  
rabbit CGTGTGCGTGTCTGAGGAGCCCGACGTGTGCCGCTGTTCTGTGACTTCTACAAAAA  
\* \*\*\*\* \*\*\*\*\* \*\* \*\* \* \* \*\*\*\*\* \*\*\*\*\* \*\*\*\*\* \*\*\*\*\*

human CGAAGGCCAGTGCAGTGGCACTACCAGCCCTGCGGGGTGCCCTGCCTGCGACCTGCCG  
rabbit CGAGGGCCAGTGCAGTGGCACTACCAGCCCTGCGGGGCGCCCTGCATGCGGACGTGCCG  
\*\* \*\*\*\*\* \*\*\*\*\* \*\*\*\*\* \*\*\*\*\* \*\*\*\*\* \*\* \*\* \*\*\*\*\*

human GAACCCCGTGGAGACTGCCTGCGGGACGTCTGGGCCTGGAAGGCTGCTACCCCAAGTG  
rabbit GAACCCAGTGGAGAGTGC-----  
\*\*\*\*\* \*\*\*\*\* \*\*

human CCCACCAGAGGCTCCCATCTTTGATGAGGACAAGATGCAGTGTGTGGCCACCTGCCAAC  
rabbit -----

human            CCCGCCTCTGCCACCACGGTGCCACGTCCATGGGAAGTCCTACCGGCCAGGTGCAGTGGT  
rabbit            -----

human            GCCCTCGGACAAGAAGTCCAGTCCTGCCTTTGTACGGAGCGCGGGTGGAGTGCACCTA  
rabbit            -----

human            CAAAGCTGAGGCCTGTGTCTGCACCTACAATGGACAGCGCTTCCACCCAGGGGACGTCAT  
rabbit            -----

human            CTACCACACGACGGATGGCACGGGTGGCTGCATCTCCGCCCGCTGCGGGGCCAACGGCAC  
rabbit            -----

human            CATTGAGAGGAGGGTCTACCCCTGCAGCCCCACCACCCTGTCCCCCAACCACCTTCTC  
rabbit            -----

human            CTTCTCCACACCCCGCTTGTGCTGAGCTCCACGCACACCCCAAGCAATGGCCCAAGCAG  
rabbit            -----

human            CGCGCACACAGGCCCTCCGAGCAGCGCCTGGCCCACCACAGCAGGCACTTCTCCAGGAC  
rabbit            -----

human            GAGGCTGCCACAGCCTCTGCCTCACTGCCGCCGTCTGTGGGAAAAGTGCCTGTGGTC  
rabbit            -----

human            GCCATGGATGGATGTCAGCCGCCCTGGACGGGGCACGGACAGCGGTGACTTCGACACACT  
rabbit            -----



human GGAGAACCTCCGCGCCCATGGGTACCGGGTGTGCGAATCACCCAGGTCGGTGGAGTGCCG  
rabbit -----

human AGCTGAGGACGCCCCGGAGTGCCGCTCCGAGCCCTGGGGCAGCGTGTGCAGTGCAGCCC  
rabbit -----

human GGATGTGGGGCTGACCTGTCGTAACAGGGAGCAGGCATCGGGGCTCTGCTACAACTACCA  
rabbit -----

human GATCAGGGTCCAGTGTGCACGCCCTAGCCTGCTCCACCTCTAGCAGTCCAGCCCAGAC  
rabbit -----

human CACTCCTCCAACCTACCTCCAAGACCACTGAAACCCGGGCCTCAGGCTCCTCAGCTCCCAG  
rabbit -----

human CAGCACACCTGGCACCGTGTCTCTCTCTACAGCCAGGACGACACCTGCCCCAGGTACCGC  
rabbit -----

human TACCTCTGTCAAAAAAATTTCTCAACTCCCAGCCCTCGCCAGTGCCGGCAACATCAAC  
rabbit -----

human ATCATCCATGTCGACCACGACCCCGGGGACCTCTGTGGTCTCCAGCAAGCCCACCCTCAC  
rabbit -----

human TGAGCCCAGCACATCCTCCTGCCTGCAGGAGCTTTGCACCTGGACCGAGTGGATCGATGG  
rabbit -----

human CAGCTACCCTGCTCCTGGAATAAATGGTGGAGATTTTGACACATTTCAAATTTGAGAGA  
rabbit -----

human CGAAGGATACACATTCTGTGAAAGTCCTCGAAGCGTGCAGTGCCGGGCAGAGAGCTTCCC  
rabbit -----

human CAACACGCCGCTGGCAGACCTGGGGCAGGACGTCATCTGCAGCCACACAGAGGGGCTGAT  
rabbit -----

human TTGCCTGAACAAGAACCAGCTCCCACCCATCTGCTACAACATGAGATCCGCATCCAGTG  
rabbit -----

human TTGCGAGACGGTGAACGTGTGCAGAGACATCACCAGACCGCCAAGACCGTCGCAACGAC  
rabbit -----

human ACGGCCGACTCCACATCCAACCGGAGCTCAGACCCAGACCACCTTACCACACACATGCC  
rabbit -----

human CTCGGCCTCCACAGAGCAACCCACGGCAACCTCCAGGGGTGGGCCACAGCAACCAGCGT  
rabbit -----

human CACACAGGGCACCCACACCACACAGTACCAGAACTGTCATCCCCGGTGCACCTGGAC  
rabbit -----

human AAAGTGGTTCGACGTGGACTTCCCGTCCCCGGACCCCATGGTGGAGACAAGGAAACCTA  
rabbit -----

human CAACAACATCATCAGGAGTGGGGAAAAATCTGCCGCCGACCTGAGGAGATCACCAGGCT  
rabbit -----

human CCAGTGCCGAGCCAAGAGCCACCCAGAGGTGAGCATCGAACACCTGGGCCAGGTGGTGCA  
rabbit -----

human GTGCAGCCGGGAAGAGGGCCTGGTGTGCCGGAACCAGGACCAGCAGGGACCCTTCAAGAT  
rabbit -----

human GTGCCTCAACTACGAGGTGCGTGTGCTCTGCTGCGAGACCCCCAGAGGCTGCCCCGTGAC  
rabbit -----

human CTCCACACCTGTGACAGCTCCTAGCACCCCTAGTGGGAGAGCCATCAGCCCAACTCAGAG  
rabbit -----

human CACCTCCTCTTGGCAGAAATCCAGGACAACCACTTTGGTGACAACCAGCACAACCTCCAC  
rabbit -----

human TCCACAGACCAGTACAACCTATGCCATACAACCAGCACAACCTCTGCTCCTACAGCCAG  
rabbit -----

human AACAACTCTGCTCCTACAACCAGAACAACCTCTGCCTCTCCAGCCAGCACAACCTCTGG  
rabbit -----

human TCCTGGAAATACTCCCAGCCCTGTTCCCTACCACCAGCACAATCTCTGCTCCTACAACCTAG  
rabbit -----

human            CATAACCTCTGCCCTACAACCAGCACAACCTCTGCCCTACAAGCAGCACAACCTCTGC  
rabbit            -----

human            TCCTACAACCAGCACAACCTCTGCCCTACAAGCAGCACAACCTCCAGTCCACAGACCAG  
rabbit            -----

human            CACAACCTCGGCTCCTACAACCAGCACAACCTTCTGGTCCTGGAACACCCCAAGCCCTGT  
rabbit            -----

human            TCCCAGACCAGC  
rabbit            -----

Underline fields are primer sequences we used.

**Supplemental Information 4.**

CLUSTAL 2.1 multiple sequence alignment

**Muc16**

human           AAGCGTTGCACAATTCCCCAACCTCCATACATACGGCAGCTCTTCTAGACACAGGTTTT  
rabbit           -----

human           CCCAGGTCAAATGCGGGGACCCAGCCATATCTCCACCCTGAGAAATTTTGGAGTTTCA  
rabbit           -----

human           GGGAGCTCAGAAGCTCTGCAGAGGCCACCCTCTCTGAGGGGATTCTTCTTAGACCTCCAT  
rabbit           -----

human           CCAGAGGCAAATGTTGACCTGTCCATGCTGAAACCCTCAGGCCTCCTGGGTCATCTTCT  
rabbit           -----

human           CCCACCCGCTCCTTGATGACAGGGAGCAGGAGCACTAAAGCCACACCAGAAATGGATTCA  
rabbit           -----

human           GGACTGACAGGAGCCACCTTGTCACCTAAGACATCTACAGGTGCAATCGTGGTGACAGAA  
rabbit           -----

human           CATACTCTGCCCTTTACTTCCCAGATAAGACCTTGGCCAGTCCTACATCTTCGGTTGTG  
rabbit           -----

human           GGAAGAACCACCCAGTCTTTGGGGGTGATGTCCTCTGCTCTCCCTGAGTCAACCTCTAGA  
rabbit           -----

human GGAATGACACACTCCGAGCAAAGAACCAGCCCATCGCTGAGTCCCCAGGTCAATGGAAC  
rabbit -----

human CCCTCTAGGAACTACCCTGCTACAAGCATGGTTTCAGGATTGAGTCCCCAAGGACCAGG  
rabbit -----

human ACCAGTTCACAGAAGGAAATTTACCAAAGAAGCATCTACATACACACTCACTGTAGAG  
rabbit -----

human ACCACAAGTGGCCAGTCACTGAGAAGTACACAGTCCCCTGAGACCTCAACAACGAA  
rabbit -----

human GGTGACAGCACAGAGACCCCTGGGACACAAGATATATTCTGTAAAAATCACATCTCCA  
rabbit -----

human ATGAAAACATTTGCAGATTCAACTGCATCCAAGGAAAATGCCCCAGTGTCTATGACTCCA  
rabbit -----

human GCTGAGACCACAGTTACTGACTCACATACTCCAGGAAGGACAAACCCATCATTGGGACA  
rabbit -----

human CTTTATTCTTCCTTCCTTGACCTATCACCTAAAGGGACCCCAAATTCCAGAGGTGAAACA  
rabbit -----

human AGCCTGGAACGATTCTATCAACCACTGGATATCCCTTCTCCTCTCCTGAACCTGGCTCT  
rabbit -----

human GCAGGACACAGCAGAATAAGTACCAGTGCGCCTTTGTCATCATCTGCTTCAGTTCTCGAT  
rabbit -----

human AATAAAATATCAGAGACCAGCATATTCTCAGGCCAGAGTCTCACCTCCCCTCTGTCTCCT  
rabbit -----

human GGGGTGCCCGAGGCCAGAGCCAGCACAATGCCCAACTCAGCTATCCCTTTTTCCATGACA  
rabbit -----

human CTAAGCAATGCAGAAACAAGTGCCGAAAGGGTCAGAAGCACAATTCCTCTCTGGGGACT  
rabbit -----

human CCATCAATATCCACAAAGCAGACAGCAGAGACTATCCTTACCTTCCATGCCTTCGCTGAG  
rabbit -----

human ACCATGGATATACCCAGCACCCACATAGCCAAGACTTTGGCTTCAGAATGGTTGGGAAGT  
rabbit -----

human CCAGGTACCCTTGGTGGCACCAGCACTTCAGCGCTGACAACCACATCTCCATCTACCACT  
rabbit -----

human TTAGTCTCAGAGGAGACCAACCCATCACTCCACGAGTGAAAGGAAACAGAAGGAACT  
rabbit -----

human TTGAATACATCTATGACTCCACTTGAGACCTCTGCTCCTGGAGAAGAGTCCGAAATGACT  
rabbit -----

human GCCACCTTGGTCCCCTCTAGGTTTTACAACCTTTGACAGCAAGATCAGAAGTCCATCT  
rabbit -----

human CAGGTCTCTTCATCCCACCCAACAAGAGAGCTCAGAACCACAGGCAGCACCTCTGGGAGG  
rabbit -----

human CAGAGTTCAGCACAGCTGCCACGGGAGCTCTGACATCCTGAGGGCAACCACTTCCAGC  
rabbit -----

human ACCTCAAAGCATCATCATGGACCAGTGAAAGCACAGCTCAGCAATTTAGTGAACCCAG  
rabbit -----

human CACACACAGTGGGTGGAGACAAGTCCTAGCATGAAAACAGAGAGACCCCAGCATCAACC  
rabbit -----

human AGTGTGGCAGCCCTATCACCATTCTGTTCCCTCAGTGGTCTCTGGCTTACCACCCTG  
rabbit -----

human AAGACCAGCTCCACAAAAGGGATTTGGCTTGAAGAAACATCTGCAGACACACTCATCGGA  
rabbit -----

human GAATCCACAGCTGGCCCAACCACCCATCAGTTTGTGTTCCCACTGGGATTTCAATGACA  
rabbit -----

human GGAGGCAGCAGCACCAGGGGAAGCCAGGGCACAACCCACCTACTCACCAGAGCCACAGCA  
rabbit -----



human TCATCTGAGACATCCGCAGATTTGACTCTGGCCACGAACGGTGTCCCAGTCTCCGTGTCT  
rabbit -----

human CCAGCAGTGAGCAAGACGGCTGCTGGCTCAAGTCTCCAGGAGGGACAAAGCCATCATAT  
rabbit -----

human ACAATGGTTTCTTCTGTCATCCCTGAGACATCATCTCTACAGTCCCTCAGCTTTCAGGGAA  
rabbit -----

human GGAACCAGCCTGGGACTGACTCCATTAACACTAGACATCCCTTCTCTTCCCCTGAACCA  
rabbit -----

human GACTCTGCAGGACACACCAAGATAAGCACCAGCATTCTCTGTTGTCATCTGCTTCAGTT  
rabbit -----

human CTTGAGGATAAAGTGTGTCAGCGACCAGCACATTCTCACACCACAAAGCCACCTCATCTATT  
rabbit -----

human ACCACAGGGACTCCTGAAATCTCAACAAAGACAAAGCCCAGCTCAGCGTTCTTTCCTCC  
rabbit -----

human ATGACCCTAAGCAATGCAGCAACAAGTCTGAAAGAGTCAGAAATGCAACTCCCCTCTG  
rabbit -----

human ACTCATCCATCTCCATCAGGGGAAGAGACAGCAGGGAGTGTCTCACTCTCAGCACCTCT  
rabbit -----

human GCTGAGACTACAGACTCACCTAACATCCACCCAACCTGGGACACTGACTTCAGAATCGTCA  
rabbit -----

human GAGAGTCCTAGCACTCTCAGCCTCCCAAGTGTCTCTGGAGTCAAACCACATTTTCTTCA  
rabbit -----

human TCTACTCCTTCCACTCATCTATTTACTAGTGGAGAAGAAACAGAGGAAACTTCGAATCCA  
rabbit -----

human TCTGTGTCTCAACCTGAGACTTCTGTTTCCAGAGTAAGGACCACCTTGGCCAGCACCTCT  
rabbit -----

human GTCCCTACCCAGTATTCCCACCATGGACACCTGGCCTACACGTTCACTCAGTTCTCT  
rabbit -----

human TCATCCCACCTAGTGAGTGAGCTCAGAGCTACGAGCAGTACCTCAGTTACAACTCAACT  
rabbit -----

human GGTTCACTCTTCTCTAAAATATCTCACCTCACTGGGACGGCAACAATGTCACAGACCAAT  
rabbit -----

human AGAGACACGTTTAATGACTCTGCTGCACCCCAAAGCACAACCTGGCCAGAGACTAGTCCC  
rabbit -----

human AGATTCAAGACAGGGTTACCTTCAGCAACAACCACTGTTTCAACCTCTGCCACTTCTCTC  
rabbit -----

human TCTGCTACTGTAATGGTCTCTAAATTCACCTTCTCCAGCAACTAGTTCATGGAAGCAACT  
rabbit -----

human TCTATCAGGGAACCATCAACAACCATCCTCACAACAGAGACCACGAATGGCCCAGGCTCT  
rabbit -----

human ATGGCTGTGGCTTCTACCAACATCCCAATTGGAAAGGGCTACATTACTGAAGGAAGATTG  
rabbit -----

human GACACAAGCCATCTGCCATTGGAACCACAGCTTCCTCTGAGACATCTATGGATTTTACC  
rabbit -----

human ATGGCCAAAGAAAGTGTCTCAATGTCAGTATCTCCATCTCAGTCCATGGATGCTGCTGGC  
rabbit -----

human TCAAGCACTCCAGGAAGGACAAGCCAATTCGTTGACACATTTTCTGATGATGTCTATCAT  
rabbit -----

human TTAACATCCAGAGAAATTACAATACCTAGAGATGGAACAAGCTCAGCTCTGACTCCACAA  
rabbit -----

human ATGACTGCAACTCACCTCCATCTCCTGATCCTGGCTCTGCTAGAAGCACCTGGCTTGGC  
rabbit -----

human ATCTTGTCTCATCTCCTTCTTCTCCTACTCCCAAAGTCACAATGAGCTCCACATTTTCA  
rabbit -----

human ACTCAGAGAGTCACCACAAGCATGATAATGGACACAGTTGAAACTAGTCGGTGGAAACATG  
rabbit -----

human CCCAACTTACCTTCCACGACTTCCTTGACACCAAGTAATATTCCAACAAGTGGTGCCATA  
rabbit -----

human GGAAAAAGCACCCCTGGTTCCCTTGGACACTCCATCTCCAGCCACATCATTGGAGGCATCA  
rabbit -----

human GAAGGGGGACTTCCAACCCTCAGCACCTACCCTGAATCAACAAACACACCCAGCATCCAC  
rabbit -----

human CTCGGAGCACACGCTAGTTCAGAAAGTCCAAGCACCATCAAACCTACCATGGCTTCAGTA  
rabbit -----

human GTAAAACCTGGCTCTTACACACCTCTCACCTTCCCCTCAATAGAGACCCACATTCATGTA  
rabbit -----

human TCAACAGCCAGAATGGCTTACTCTTCTGGGTCTTACCTGAGATGACAGCTCCTGGAGAG  
rabbit -----

human ACTAACACTGGTAGTACCTGGGACCCACCACCTACATCACCACTACGGATCCTAAGGAT  
rabbit -----

human ACAAGTTCAGCTCAGGTCTCTACCCCCACTCAGTGAGGACACTCAGAACCACAGAAAAC  
rabbit -----

human CATCAAAGACAGAGTCCGCCACCCCAGCTGCTTACTCTGGAAGTCCTAAAATCTCAAGT  
rabbit -----

human TCACCCAATCTCACCAGTCCGGCCACAAAAGCATGGACCATCACAGACACAACCTGAACAC  
rabbit -----

human TCCACTCAATTACATTACACAAAATTGGCAGAAAAATCATCTGGATTTGAGACACAGTCA  
rabbit -----

human GCTCCAGGACCTGTCTCTGTAGTAATCCCTACCTCCCCTACCATTGGAAGCAGCACATTG  
rabbit -----

human GAACTAACTTCTGATGTCCCAGGGGAACCCCTGGTCCTTGCTCCCAGTGAGCAGACCACA  
rabbit -----

human ATCACTCTCCCATGGCAACATGGCTGAGTACCAGTTTGACAGAGGAAATGGCTTCAACA  
rabbit -----

human GACCTTGATATTTCAAGTCCAAGTTCACCCATGAGTACATTTGCTATTTTTCCACCTATG  
rabbit -----

human TCCACACCTTCTCATGAACTTTCAAAGTCAGAGGCAGATACCAGTGCCATTAGAAATACA  
rabbit -----

human GATTCAACAACGTTGGATCAGCACCTAGGAATCAGGAGTTTGGGCAGAACTGGGGACTTA  
rabbit -----

human ACAAAGTTCCTATCACCCCACTGACAACCACGTGGACCAGTGTGATTGAACACTCAACA  
rabbit -----

human CAAGCACAGGACACCCTTTCTGCAACGATGAGTCCTACTCACGTGACACAGTCACTCAA  
rabbit -----

human GATCAAACATCTATACCAGCCTCAGCATCCCCTTCCATCTTACTGAAGTCTACCCTGAG  
rabbit -----

human CTCGGGACACAAGGGAGAAGCTCCTCTGAGGCAACCCTTTTTGAAACCATCTACAGAC  
rabbit -----

human ACACTGTCCAGAGAGATTGAGACTGGCCCAACAAACATTCAATCCACTCCACCCATGGAC  
rabbit -----

human AACACAACAACAGGGAGCAGTAGTAGTGGAGTCACCCTGGGCATAGCCCACCTTCCATA  
rabbit -----

human GGAACATCCTCCCAGCTGAGACATCCACAAACATGGCACTGGAAAGAAGAAGTTCTACA  
rabbit -----

human GCCACTGTCTCTATGGCTGGGACAATGGGACTCCTTGTTACTAGTGCTCCAGGAAGAAGC  
rabbit -----

human ATCAGCCAGTCATTAGGAAGAGTTTCCTCTGTCCTTCTGAGTCAACTACTGAAGGAGTC  
rabbit -----

human ACAGATTCTAGTAAGGGAAGCAGCCCAAGGCTGAACACACAGGGAATACAGCTCTCTCC  
rabbit -----

human TCCTCTCTTGAACCCAGCTATGCTGAAGGAAGCCAGATGAGCACAAGCATCCCTCTAACC  
rabbit -----

human TCATCTCCTACAACCTCTGATGTGGAATTCATAGGGGGCAGCACATTTTGGACCAAGGAG  
rabbit -----

human GTCACCACAGTTATGACCTCAGACATCTCCAAGTCTTCAGCAAGGACAGAGTCCAGCTCA  
rabbit -----

human GCTACCCCTTATGTCCACAGCTTTGGGAAGCACTGAAAATACAGGAAAAGAAAACTCAGA  
rabbit -----

human ACTGCCTCTATGGATCTTCCATCTCCAACCTCCATCAATGGAGGTGACACCATGGATTTCT  
rabbit -----

human CTCACTCTCAGTAATGCCCCAATACCACAGATTCACTTGACCTCAGCCATGGGGTGCAC  
rabbit -----

human ACCAGCTCTGCAGGGACTTTGGCCACTGACAGGTCATTGAATACTGGTGTCACTAGAGCC  
rabbit -----

human TCCAGATTGAAAACGGCTCTGATACCTCTTCTAAGTCCCTGTCTATGGGAAACAGCACT  
rabbit -----

human CACACTTCCATGACTTACACAGAGAAGAGTGAAGTGTCTTCTTCAATCCATCCCCGACCT  
rabbit -----

human GAGACCTCAGCTCCTGGAGCAGAGACCACTTTGACTTCCACTCCTGGAAACAGGGCCATA  
rabbit -----

human AGCTTAACATTGCCTTTTTTCATCCATTCCAGTGAAGAAGTCATTTCTACAGGCATAACC  
rabbit -----

human TCAGGACCAGACATCAACTCAGCACCCATGACACATTCTCCATCACCCCACCAACAATT  
rabbit -----

human GTATGGACCAGTACAGGCACAATTGAACAGTCCACTCAACCACTACATGCAGTTTCTTCA  
rabbit -----

human GAAAAAGTTTCTGTGCAGACACAGTCAACTCCATATGTCAACTCTGTGGCAGTGTCTGCT  
rabbit -----

human TCCCCTACCCATGAGAATTCAGTCTTCTGGAAGCAGCACATCCTCTCCATATTCCTCA  
rabbit -----

human GCCTCACTTGAATCCTTGGATTCCACAATCAGTAGGAGGAATGCAATCACTTCTGGCTA  
rabbit -----

human TGGGACCTCACTACATCTCTCCCCTACAACCTGGCCAAGTACTAGTTTATCTGAGGCA  
rabbit -----



human CTGTCCTCAGGCCATTCTGGGGTTTCAAACCCAAGTTCAACTACGACTGAATTTCCACTC  
rabbit -----

human TTTTCAGCTGCATCCACATCTGCTGCTAAGCAAAGAAATCCAGAAACAGAGACCCATGGT  
rabbit -----

human CCCCAGAATACAGCCGCGAGTACTTTGAACACTGATGCATCCTCGGTCACAGGTCTTTCT  
rabbit -----

human GAGACTCCTGTGGGGCAAGTATCAGCTCTGAAGTCCCTCTTCCAATGGCCATAACTTCT  
rabbit -----

human AGATCAGATGTTTCTGGCCTTACATCTGAGAGTACTGCTAACCCGAGTTTAGGCACAGCC  
rabbit -----

human TCTTCAGCAGGGACCAAATTAAGTACTAGGACAATATCCCTGCCACTTCAGAGTCTTTGGTT  
rabbit -----

human TCCTTTAGAATGAACAAGGATCCATGGACAGTGTCAATCCCTTTGGGGTCCCATCCAAC  
rabbit -----

human ACTAATACAGAAACAAGCATCCAGTAAACAGCGCAGGTCCACCTGGCTTGTCCACAGTA  
rabbit -----

human GCATCAGATGTAATTGACACACCTTCAGATGGGGCTGAGAGTATCCCACTGTCTCCTTT  
rabbit -----

human TCCCCTCCCCTGATACTGAAGTGACAACTATCTCACATTTCCAGAAAAGACAACATCAT  
rabbit -----

human TCATTTAGAACCATTTTCATCTCTCACTCATGAGTTGACTTCAAGAGTGACACCTATTCT  
rabbit -----

human GGGGATTGGATGAGTTCAGCTATGTCTACAAAGCCCACAGGAGCCAGTCCCTCCATTACA  
rabbit -----

human CTGGGAGAGAGAAGGACAATCACCTCTGCTGCTCCAACCACTTCCCCATAGTTCTCACT  
rabbit -----

human GCTAGTTTCACAGAGACCAGCACAGTTTCACTGGATAATGAAACTACAGTAAAAACCTCA  
rabbit -----

human GATATCCTTGACGCACGGAAAACAAATGAGCTCCCCTCAGATAGCAGTTCTTCTTCTGAT  
rabbit -----

human CTGATCAACACCTCCATAGCTTCTTCAACTATGGATGTCACATAAACAGCCTCCATCAGT  
rabbit -----

human CCCACTAGCATCTCAGGAATGACAGCAAGTTCTCCCCTCTCTTCTCTTCTCAGATAGA  
rabbit -----

human CCCCAGGTTCCCACATCTACAACAGAGACAAATACAGCCACCTCTCCATCTGTTTCCAGT  
rabbit -----

human AACACCTATTCTTTGATGGGGGCTCCAATGTGGGTGGCACTCCATCCACTTTACCACCC  
rabbit -----

human TTTACAATCACCCACCCTGTGAGACAAGCTCGGCCCTATTAGCCTGGTCTAGACCAGTA  
rabbit -----

human AGAACTTTCAGCACCATGGTCAGCACTGACACTGCCTCCGGAGAAAATCCTACCTCTAGC  
rabbit -----

human AATTCTGTGGTGACTTCTGTTCCAGCACCAGGTACATGGACCAGTGTAGGCAGTACTACT  
rabbit -----

human GACTTACCTGCCATGGGCTTTCTCAAGACAAGTCTGCAGGAGAGGCACACTCACTTCTA  
rabbit -----

human GCATCAACTATTGAACCAGCCACTGCCTTCACTCCCCATCTCTCAGCAGCAGTGGTCACT  
rabbit -----

human GGATCCAGTGCTACATCAGAAGCCAGTCTTCTCACTACGAGTGAAAGCAAAGCCATTCAT  
rabbit -----

human TCTTCACCACAGACCCCAACTACACCCACCTCTGGAGCAAACCTGGGAAACTTCACTACT  
rabbit -----

human CCTGAGAGCCTTTTGGTAGTCACTGAGACTTCAGACACAACACTTACCTCAAAGATTTTG  
rabbit -----

human GTCACAGATACCATCTTGTTTTCAACTGTGTCCACGCCACCTTCTAAATTTCCAAGTACG  
rabbit -----

human GGGACTCTGTCTGGAGCTTCCTTCCCTACTTTACTCCGGGACACTCCAGCCATCCCTCTC  
rabbit -----

human ACTGCCACTGAGCCAACAAGTTCATTAGCTACATCCTTTGATTCCACCCCACTGGTGACT  
rabbit -----

human ATAGCTTCGGATAGTCTTGGCACAGTCCCAGAGACTACCCTGACCATGTCAGAGACCTCA  
rabbit -----

human AATGGTGATGCACTGGTTCTTAAGACAGTAAGTAACCCAGATAGGAGCATCCCTGGAATC  
rabbit -----

human ACTATCCAAGGAGTAACAGAAAGTCCACTCCATCCTTCTTCCACTTCCCCCTAAGATT  
rabbit -----

human GTTGCTCCACGGAATACAACCTATGAAGGTTGATCACAGTGGCACTTTCTACTTTGCCT  
rabbit -----

human GCGGGAACACTGGTTCCCTTGATTGATCAGAGTTCTGAAAACCTCAGAGACAACGGCT  
rabbit -----

human TTGGTAGACTCATCAGCTGGGCTTGAGAGGGCATCTGTGATGCCACTAACCACAGGAAGC  
rabbit -----

human CAGGGTATGGCTAGCTCTGGAGGAATCAGAAGTGGGTCCACTCACTCAACTGGAACCAAA  
rabbit -----

human ACATTTTCTTCTCTCCCTCTGACCATGAACCCAGGTGAGGTTACAGCCATGTCTGAAATC  
rabbit -----

human ACCACGAACAGACTGACAGCTACTCAATCAACAGCACCCAAAGGGATACCTGTGAAGCCC  
rabbit -----

human ACCAGTGCTGAGTCAGGCCTCCTAACACCTGTCTCTGCCTCCTCAAGCCCATCAAAGGCC  
rabbit -----

human TTTGCCTCACTGACTACAGCTCCCCAACTTGGGGGATCCCACAGTCTACCTTGACATTT  
rabbit -----

human GAGTTTTCTGAGGTCCCAAGTTTGGATACTAAGTCCGCTTCTTTACCAACTCCTGGACAG  
rabbit -----

human TCCCTGAACACCATTCCAGACTCAGATGCAAGCACAGCATCTTCCTCACTGTCCAAGTCT  
rabbit -----

human CCAGAAAAAACC CAAGGGCAAGGATGATGACTTCCACAAAGGCCATAAGTGCAAGCTCA  
rabbit -----

human TTTCAATCAACAGGTTTTACTGAAACCCTGAGGGATCTGCCTCCCCTTCTATGGCAGGG  
rabbit -----

human CATGAACCCAGAGTCCCCACTTCAGGAACAGGGGACCCTAGATATGCCTCAGAGAGCATG  
rabbit -----

human TCTTATCCAGACCCAAGCAAGGCATCATCAGCTATGACATCGACCTCTCTTGATCAAAA  
rabbit -----

human CTCACAACCTCTTTCAGCACAGGTCAAGCAGCAAGGTCTGGTTCTAGTTCTCTCCATA  
rabbit -----

human AGCCTATCCACTGAGAAAGAAACAAGCTTCCTTTCCCCACTGCATCCACCTCCAGAAAG  
rabbit -----

human ACTTCACTATTTCTTGGGCCTTCCATGGCAAGGCAGCCCAACATATTGGTGCATCTTCAG  
rabbit -----

human ACTTCAGCTCTGACACTTTCTCCAACATCCACTCTAAATATGTCCCAGGAGGAGCCTCCT  
rabbit -----

human GAGTTAACCTCAAGCCAGACCATTGCAGAAGAAGAGGGAACAACAGCTGAAACACAGACG  
rabbit -----

human TTAACCTTCACACCATCTGAGACCCCAACATCCTTGTTACCTGTCTCTTCTCCACAGAA  
rabbit -----

human CCCACAGCCAGAAGAAAGAGTTCTCCAGAAACATGGGCAAGCTCTATTTAGTTCTGCTGCC  
rabbit -----

human AAGACCTCCTTGGTTGAAACAACCTGATGGAACGCTAGTGACCACCATAAAGATGTCAAGC  
rabbit -----

human CAGGCAGCACAAAGGAAATTCACGTGGCCTGCCCCAGCAGAGGAGACGGGGAGCAGTCCA  
rabbit -----

human GCAGGCACATCCCAGGAAGCCCAGAAATGTCTACCACTCTCAAATCATGAGCTCCAAG  
rabbit -----

human GAACCCAGCATCAGCCCAGAGATCAGGTCCACTGTGAGAAATTCTCCTTGAAGACTCCA  
rabbit -----

human GAAACAACCTGTTCCCATGGAGACCACAGTGGAACCAGTCACCCTTCAGTCCACAGCCCTA  
rabbit -----

human GGAAGTGGCAGCACCAGCATCTCTCACCTGCCACAGGAACCACATCACCAACCAAGTCA  
rabbit -----

human CCAACAGAAAATATGTTGGCTACAGAAAGGGTCTCCCTCTCCCATCCCACCTGAGGCT  
rabbit -----

human TGGACCAACCTTTATTCTGGAACCTCAGGAGGGACCAGGCAGTCACTGGCCACAATGTCC  
rabbit -----

human TCTGTCTCCCTAGAGTCACCAACTGCTAGAAGCATCACAGGGACTGGTCAGCAAAGCAGT  
rabbit -----

human CCAGAACTGGTTTCAAAGACAACCTGGAATGGAATTCTCTATGTGGCATGGCTCTACTGGA  
rabbit -----

human GGGACCACAGGGGACACACATGTCTCTCTGAGCACATCTTCCAATATCCTTGAAGACCT  
rabbit -----

human GTAACCAGCCCAAACCTCTGTGAGCTCATTGACAGATAAATCCAACATAAAACCGAGACA  
rabbit -----

human TGGGTAAGCACCCACAGCCATTCCCTCCACTGTCCTGAATAATAAGATAATGGCAGCTGAA  
rabbit -----

human CAACAGACAAGTCGATCTGTGGATGAGGCTTATTCATCAACTAGTTCTTGGTCAGATCAG  
rabbit -----

human ACATCTGGGAGTGACATCACCCCTTGGTGCATCTCCTGATGTCACAAACACATTATACATC  
rabbit -----

human ACCTCCACAGCACAAACCACCTCACTAGTGTCTCTGCCCTCTGGAGACCAAGGCATTACA  
rabbit -----

human AGCCTCACCAATCCCTCAGGAGGAAAAACAAGCTCTGCGTCATCTGTCACATCTCCTTCA  
rabbit -----

human ATAGGGCTTGAGACTCTGAGGGCCAATGTAAGTGCAGTGAAAAGTGACATTGCCCTACT  
rabbit -----



human GCTGGGCATCTATCTCAGACTTCATCTCCTGCGGAAGTGAGCATCCTGGACGTAACCACA  
rabbit -----

human GTCCTACTCCAGGTATCTCCACCACCATCACCACCATGGGAACCAACTCAATCTCAACT  
rabbit -----

human ACCACACCCAACCCAGAAGTGGGTATGAGTACCATGGACAGCACCCCGGCCACAGAGAGG  
rabbit -----

human CGCACAACCTTCTACAGAACACCCTTCCACCTGGTCTTCCACAGCTGCATCAGATTCTGG  
rabbit -----

human ACTGTCACAGACATGACTTCAAACCTTGAAAGTTGCAAGATCTCCTGGAACAATTTCCACA  
rabbit -----

human ATGCATACAACCTTATTCTTAGCCTCAAGCACTGAATTAGACTCCATGTCTACTCCCAT  
rabbit -----

human GGCCGTATAACTGTCATTGGAACCAGCCTGGTCACTCCATCCTCTGATGCTTCAGCTGTA  
rabbit -----

human AAGACAGAGACCAGTACAAGTGAAAGAACATTGAGTCCTTCAGACACAACCTGCATCTACT  
rabbit -----

human CCCATCTCAACTTTTTCTCGTGTCCAGAGGATGAGCATCTCAGTTCCTGACATTTTAAGT  
rabbit -----

human ACAAGTTGGACTCCCAGTAGTACAGAAGCAGAAGATGTGCCTGTTTCAATGGTTTCTACA  
rabbit -----

human GATCATGCTAGTACAAAGACTGACCCAAATACGCCCTGTCCACTTTTCTGTTTGATTCT  
rabbit -----

human CTGTCCACTCTTGACTGGGACACTGGGAGATCTCTGTCATCAGCCACAGCCACTACCTCA  
rabbit -----

human GCTCCTCAGGGGGCCACAACCTCCCAGGAACTCACTTTGGAAACCATGATCAGCCCAGCT  
rabbit -----

human ACCTCACAGTTGCCCTTCTCTATAGGGCACATTACAAGTGCAGTCACACCAGCTGCAATG  
rabbit -----

human GCAAGGAGCTCTGGAGTTACTTTTTCAAGACCAGATCCCACAAGCAAAAAGGCAGAGCAG  
rabbit -----

human ACTTCCACTCAGCTTCCCACCACCACTTCTGCACATCCAGGGCAGGTGCCAGATCAGCA  
rabbit -----

human GCAACAACCTCTGGATGTGATCCCACACACAGCAAAAACCTCCAGATGCAACTTTTCAGAGA  
rabbit -----

human CAAGGGCAGACAGCTCTTACAACAGAGGCAAGAGCTACATCTGACTCCTGGAATGAGAAA  
rabbit -----

human GAAAAATCAACCCCAAGTGCACCTTGGATCACTGAGATGATGAATTCTGTCTCAGAAGAT  
rabbit -----

human ACCATCAAGGAGGTTACCAGCTCCTCCAGTGTATTAAGGACCCTGAATACGCTGGACATA  
rabbit -----

human AACTTGGAATCTGGGACGACTTCATCCCAAGTTGGAAAAGCAGCCATATGAGAGAATT  
rabbit -----

human GCCCCTTCTGAGTCCACCACAGACAAAGAGGCAATTCACCCTTCTACAAACACAGTAGAG  
rabbit -----

human ACCACAGGCTGGGTCACAAGTTCCGAACATGCTTCTCATTCCACTATCCAGCCCACTCA  
rabbit -----

human GCGTCATCCAAACTCACATCTCCAGTGGTTACAACCTCCACCAGGGAACAAGCAATAGTT  
rabbit -----

human TCTATGTCAACAACCACATGGCCAGAGTCTACAAGGGCTAGAACAGAGCCTAATTCCTTC  
rabbit -----

human TTGACTATTGAACTGAGGGACGTGAGCCCTTACATGGACACCAGCTCAACCACACAAACA  
rabbit -----

human AGTATTATCTCTTCCCAGGTTCCACTGCGATCACCAAGGGGCCTAGAACAGAAATTACC  
rabbit -----

human TCCTCTAAGAGAATATCCAGCTCATTCCCTTGCCCAGTCTATGAGGTCGTCAGACAGCCCC  
rabbit -----

human TCAGAAGCCATCACCAGGCTGTCTAACTTTCCTGCCATGACAGAATCTGGAGGAATGATC  
rabbit -----

human CTTGCTATGCAAACAAGTCCACCTGGCGCTACATCACTAAGTGCACCTACTTTGGATACA  
rabbit -----

human TCAGCCACAGCCTCCTGGACAGGGACTCCACTGGCTACGACTCAGAGATTTACATACTCA  
rabbit -----

human GAGAAGACCACTCTCTTTAGCAAAGGTCTGAGGATACATCACAGCCAAGCCCTCCCTCT  
rabbit -----

human GTGGAAGAAACCAGCTCTTCCTCTTCCCTGGTACCTATCCATGCTACAACCTCGCCTTCC  
rabbit -----

human AATATTTTGTGACATCACAAAGGGCACAGTCCCTCCTCTACTCCACCTGTGACCTCAGTT  
rabbit -----

human TTCTTGTCTGAGACCTCTGGCCTGGGGAAGACCACAGACATGTCGAGGATAAGCTTGGAA  
rabbit -----

human CCTGGCACAAGTTTACCTCCCAATTTGAGCAGTACAGCAGGTGAGGCGTTATCCACTTAT  
rabbit -----

human GAAGCCTCCAGAGATACAAAGGCAATTCATCATTCTGCAGACACAGCAGTGACGAATATG  
rabbit -----

human GAGGCAACCAGTTCTGAATATTCTCCTATCCCAGGCCATACAAAGCCATCCAAGCCACA  
rabbit -----

human TCTCCATTGGTTACCTCCCACATCATGGGGGACATCACTTCTTCCACATCAGTATTTGGC  
rabbit -----

human TCCTCCGAGACCACAGAGATTGAGACAGTGCCTCTGTGAACCAGGGACTTCAGGAGAGA  
rabbit -----

human AGCACATCCCAGGTGGCCAGCTCTGCTACAGAGACAAGCACTGTCATTACCCATGTGTCT  
rabbit -----

human AGTGGTGATGCTACTACTCATGTCACCAAGACACAAGCCACTTTCTCTAGCGGAACATCC  
rabbit -----

human ATCTCAAGCCCTCATCAGTTTATAACTTCTACCAACACATTTACAGATGTGAGCACCAAC  
rabbit -----

human CCCTCCACCTCTCTGATAATGACAGAATCTTCAGGAGTGACCATACCACCCAAACAGGT  
rabbit -----

human CCTACTGGAGCTGCAACACAGGGTCCATATCTCTTGGACACATCAACCATGCCTTACTTG  
rabbit -----

human ACAGAGACTCCATTAGCTGTGACTCCAGATTTTATGCAATCAGAGAAGACCACTCTCATA  
rabbit -----

human AGCAAAGGTCCCAAGGATGTGTCCTGGACAAGCCCTCCCTCTGTGGCAGAAACCAGCTAT  
rabbit -----

human CCCTCTTCCCTGACACCTTTCTTGGTCACAACCATACCTCCTGCCACTTCCACGTTACAA  
rabbit -----

human GGGCAACATACATCCTCTCCTGTTTCTGCGACTTCAGTTCTTACCTCTGGACTGGTGAAG  
rabbit -----

human ACCACAGATATGTTGAACACAAGCATGGAACCTGTGACCAATTCACCTCAAATTTGAAC  
rabbit -----

human AATCCATCAAATGAGATACTGGCCACTTTGGCAGCCACCACAGATATAGAGACTATTCAT  
rabbit -----

human CCTTCATAAACAAGCAGTGACCAATATGGGGACTGCCAGTTCAGCACATGTA CTGCAT  
rabbit -----

human TCCACTCTCCCAGTCAGCTCAGAACCATCTACAGCCACATCTCCAATGGTTCCTGCCTCC  
rabbit -----

human AGCATGGGGACGCTCTTGCTTCTATATCAATACCTGGTTCAGAGACCACAGACATTGAG  
rabbit -----

human GGAGAGCCAACATCCTCCCTGACTGCTGGACGAAAAGAGAACAGCACCCCTCCAGGAGATG  
rabbit -----

human AACTCAACTACAGAGTCAAACATCATCCTCTCCAATGTGTCTGTGGGGGCTATTACTGAA  
rabbit -----

human GCCACAAAATGGAAGTCCCCTCTTTTGATGCAACATTCATACCAACTCCTGCTCAGTCA  
rabbit -----

human ACAAAGTTCCAGATATTTTCTCAGTAGCCAGCAGTAGACTTTCAAACCTCCTCCCATG  
rabbit -----

human ACAATATCTACCCACATGACCACCACCAGAGGGTCTTCTGGAGCTACATCAAAGATT  
rabbit -----

human CCACTTGCCTTAGACACATCAACCTTGGAACCTCAGCAGGGACTCCATCAGTGGTGACT  
rabbit -----

human GAGGGGTTTGCCCACTCAAAAATAACCACTGCAATGAACAATGATGTCAAGGACGTGTCA  
rabbit -----

human CAGACAAACCCTCCCTTTCAGGATGAAGCCAGCTCTCCCTCTTCTCAAGCACCTGTCCTT  
rabbit -----

human GTCACAACCTTACCTTCTTCTGTTGCTTTCACACCGCAATGGCACAGTACCTCCTCCT  
rabbit -----

human GTTCTATGCCTCAGTTCTTACTTCTTCACTGGTAAAGACCGCAGGCAAGGTGGATACA  
rabbit -----

human AGCTTAGAAACAGTGACCAGTTCACCTCAAAGTATGAGCAACACTTTGGATGACATATCG  
rabbit -----

human GTCACTTCAGCAGCCACCACAGATATAGAGACAACGCATCCTTCCATAAACACAGTAGTT  
rabbit -----

human ACCAATGTGGGGACCACCGTTCAGCATTGAATCACATTCTACTGTCTCAGCTTACCCA  
rabbit -----

human GAGCCATCTAAAGTCACATCTCCAAATGTTACCACCTCCACCATGGAAGACACCACAATT  
rabbit -----

human TCCAGATCAATACCTAAATCCTCTAAGACTACAAGAACTGAGACTGAGACAACCTCCTCC  
rabbit -----

human CTGACTCCTAAACTGAGGGAGACCAGCATCTCCAGGAGATCACCTCGTCCACAGAGACA  
rabbit -----

human AGCACTGTTCCCTTACAAAGAGCTCACTGGTGCCACTACCGAGGTATCCAGGACAGATGTC  
rabbit -----

human ACTTCCTCTAGCAGTACATCCTTCCCTGGCCCTGATCAGTCCACAGTGCTCACTAGACATC  
rabbit -----



human TCCACAGAAACCAACACCAGGCTGTCTACCTCCCAATAATGACAGAATCTGCAGAAATA  
rabbit -----

human ACCATCACCACCCAAACAGGTCTCATGGGGCTACATCACAGGATACTTTTACCATGGAC  
rabbit -----

human CCATCAAATACAACCCCCAGGCAGGGATCCACTCAGCTATGACTCATGGATTTTCACAA  
rabbit -----

human TTGGATGTGACCACTCTTATGAGCAGAATTCCACAGGATGTATCATGGACAAGTCCTCCC  
rabbit -----

human TCTGTGGATAAAACCAGCTCCCCCTCTCCTTTCTGCCTCACCTGCAATGACCACACCT  
rabbit -----

human TCCCTGATTTCTTCTACCTTACCAGAGGATAAGCTCTCCTCTCCTATGACTTCACTTCTC  
rabbit -----

human ACCTCTGGCCTAGTGAAGATTACAGACATATTACGTACAGCTTGGAACCTGTGACCAGC  
rabbit -----

human TCACTTCAAATTTT CAGCAGCACCTCAGATAAGATACTGGCCACTTCTAAAGACAGTAAA  
rabbit -----

human GACACAAAGGAAATTTTTCTTCTATAAACACAGAAGAGACCAATGTGAAAGCCAACAAC  
rabbit -----

human TCTGGACATGAATCCCATTCCCTGCACTGGCTGACTCAGAGACACCCAAAGCCACAAC  
rabbit -----

human CAAATGGTTATCACCACCACTGTGGGAGATCCAGCTCCTTCCACATCAATGCCAGTGCAT  
rabbit -----

human GGTTCCTCTGAGACTACAAACATTAAGAGAGAGCCAACATATTTCTTGACTCCTAGACTG  
rabbit -----

human AGAGAGACCAGTACCTCTCAGGAGTCCAGCTTCCACGGACACAAGTTTTCTACTTTCC  
rabbit -----

human AAAGTCCCCACTGGTACTATTACTGAGGTCTCCAGTACAGGGTCAACTCTTCTAGCAAA  
rabbit -----

human ATTTCCACCCAGACCATGATAAGTCCACAGTGCCACCTGACACCTTACAGGAGAGATC  
rabbit -----

human CCCAGGGTCTTACCTCCTCTATTAAGACAAAATCTGCAGAAATGACGATCACCACCCAA  
rabbit -----

human GCAAGTCTCCTGAGTCTGCATCGCACAGTACCCTCCCTTGGACACATCAACCACACTT  
rabbit -----

human TCCCAGGGAGGGACTCATTCAACTGTGACTCAGGGATTCCATACTCAGAGGTGACCACT  
rabbit -----

human CTCATGGGCATGGGTCTGGGAATGTGTCATGGATGACAACCTCCCCTGTGGAAGAAACC  
rabbit -----

human AGCTCTGTGTCTTCCCTGATGTCTTCACCTGCCATGACATCCCCTTCTCCTGTTTCCTCC  
rabbit -----

human ACATCACCACAGAGCATCCCCTCCTCTCCTCTTCTGACTGCACTTCTACTTCTGTT  
rabbit -----

human CTGGTGACAACCACAGATGTGTTGGGCACAACAAGCCCAGAGTCTGTAACCAGTTCACCT  
rabbit -----

human CCAAATTTGAGCAGCATCACTCATGAGAGACCGGCCACTTACAAAGACTGCACACACA  
rabbit -----

human GAAGCCGCCATGCATCATTCCACAAACACCGCAGTGACCAATGTAGGGACTCCGGGTCT  
rabbit -----

human GGACATAAATCACAATCCTCTGTCTAGCTGACTCAGAGACATCGAAAGCCACACCTCTG  
rabbit -----

human ATGAGTACCACCTCCACCCTGGGGGACACAAGTGTTCACATCAACTCCTAATATCTCT  
rabbit -----

human CAGACTAACCAAATTCAAACAGAGCCAACAGCATCCCTGAGCCCTAGACTGAGGGAGAGC  
rabbit -----

human AGCAGGTCTGAGAAGACCAGCTCAACAACAGAGACAAATACTGCCTTTTCTTATGTGCC  
rabbit -----

human ACAGGTGCTATTACTCAGGCCTCCAGAACAGAAATCTCCTCTAGCAGAACATCCATCTCA  
rabbit -----

human GACCTTGATCGGCCACAATAGCACCCGACATCTCCACAGGAATGATCACCAGGCTCTTC  
rabbit -----

human ACCTCCCCATCATGACAAAATCTGCAGAAATGACCGTCACCACTCAAACAACACTACTCCT  
rabbit -----

human GGGGCTACATCACAGGGTATCCTTCCCTGGGACACATCAACCACACTTTTCCAGGGAGGG  
rabbit -----

human ACTCATTCAACCGTGTCTCAGGGATTCCACACTCAGAGATAACCACTCTTCGGAGCAGA  
rabbit -----

human ACCCCTGGAGATGTGTCATGGATGACAACTCCCCCTGTGGAAGAAACCAGCTCTGGGTTT  
rabbit -----

human TCCCTGATGTCACCTTCCATGACATCCCCTTCTCCTGTTTCTCCACATCACCAGAGAGC  
rabbit -----

human ATCCCCTCCTCTCCTCTCCCTGTGACTGCACTTCTTACTTCTGTTCTGGTGACAACCACA  
rabbit -----

human AATGTATTGGGCACAACAAGCCCAGAGCCCGTAACGAGTTCACCTCCAAATTTAAGCAGC  
rabbit -----

human CCCACACAGGAGAGACTGACCACTTACAAAGACTGCGCACACAGAAGCCATGCATGCT  
rabbit -----

human TCCATGCATACAAACTGCAGTGGCCAACGTGGGGACCTCCATTTCTGGACATGAATCA  
rabbit -----

human CAATCTTCTGTCCAGCTGATTCACACACATCCAAAGCCACATCTCCAATGGGTATCACC  
rabbit -----

human TTCGCCATGGGGGATACAAGTGTCTACATCAACTCCTGCCTTCTTTGAGACTAGAATT  
rabbit -----

human CAGACTGAATCAACATCCTCTTTGATTCCTGGATTAAGGGACACCAGGACGTCTGAGGAG  
rabbit -----

human ATCAACACTGTGACAGAGACCAGCACTGTCCTTTCAGAAGTGCCCACTACTACTACTACT  
rabbit -----

human GAGGTCTCCAGGACAGAAGTTATCACTTCCAGCAGAACAACCATCTCAGGGCCTGATCAT  
rabbit -----

human TCCAAAATGTCACCCTACATCTCCACAGAAACCATCACCAGGCTCTCCACTTTTCCTTTT  
rabbit -----

human           GTAACAGGATCCACAGAAATGGCCATCACCAACCAACAGGTCCTATAGGGACTATCTCA  
rabbit           -----

human           CAGGCTACCCTTACCCTGGACACATCAAGCACAGCTTCTGGGAAGGGACTCACTCACCT  
rabbit           -----

human           GTGACTCAGAGATTTCCACACTCAGAGGAGACCACTACTATGAGCAGAAGTACTAAGGGC  
rabbit           -----

human           GTGTCATGGCAAAGCCCTCCCTCTGTGGAAGAAACCAGTTCTCCTTCTTCCCCAGTGCCT  
rabbit           -----

human           TTACCTGCAATAACCTCACATTCATCTCTTTATTCCGCAGTATCAGGAAGTAGCCCCACT  
rabbit           -----

human           TCTGCTCTCCCTGTGACTTCCCTTCTCACCTCTGGCAGGAGGAAGACCATAGACATGTTG  
rabbit           -----

human           GACACACACTCAGAACTTGTGACCAGCTCCTTACCAAGTGCAAGTAGCTTCTCAGGTGAG  
rabbit           -----

human           ATACTCACTTCTGAAGCCTCCACAAATACAGAGACAATTCACTTTTTCAGAGAACACAGCA  
rabbit           -----

human           GAAACCAATATGGGGACCACCAATTCTATGCATAAACTACATTCTCTGTCTCAATCCAC  
rabbit           -----

human TCCCAGCCATCCGGACACACACCTCCAAAGGTTACTGGATCTATGATGGAGGACGCTATT  
rabbit -----

human GTTTCACATCAACACCTGGTTCTCCTGAGACTAAAAATGTTGACAGAGACTCAACATCC  
rabbit -----

human CCTCTGACTCCTGAACTGAAAGAGGACAGCACCGCCCTGGTGATGAACTCAACTACAGAG  
rabbit -----

human TCAAACACTGTTTTCTCCAGTGTGTCCCTGGATGCTGCTACTGAGGTCTCCAGGGCAGAA  
rabbit -----

human GTCACCTACTATGATCCTACATTCATGCCAGCTTCTGCTCAGTCAACAAAGTCCCCAGAC  
rabbit -----

human ATTCACCTGAAGCCAGCAGCAGTCATTCTAACTCTCCTCCCTTGACAATATCTACACAC  
rabbit -----

human AAGACCATCGCCACACAAACAGGTCTTCTGGGGTGACATCTCTTGGCCAAGTACCCTG  
rabbit -----

human GACACATCAACCATAGCCACCTCAGCAGGAACTCCATCAGCCAGAACTCAGGATTTTGTA  
rabbit -----

human GATTCAGAAACAACCAGTGTGCATGAACAATGATCTCAATGATGTGTTGAAGACAAGCCCT  
rabbit -----

human TTCTCTGCAGAAGAAGCCAACCTCTCTCTTCTCAGGCACCTCTCCTTGTGACAACTCA  
rabbit -----

human CCTTCTCCTGTAACCTCCACATTGCAAGAGCACAGTACCTCCTCTTGTTCCTGTGACC  
rabbit -----

human TCAGTACCCACCCCTACACTGGCGAAGATCACAGACATGGACACAACTTAGAACCTGTG  
rabbit -----

human ACTCGTTCACCTCAAAATTTAAGGAACACCTTGGCCACTTCAGAAGCCACCACAGATACA  
rabbit -----

human CACACAATGCATCCTTCTATAAACACAGCAGTGGCCAATGTGGGGACCACCAGTTCACCA  
rabbit -----

human AATGAATTCTATTTTACTGTCTCACCTGACTCAGACCCATATAAAGCCACATCCGCAGTA  
rabbit -----

human GTTATCACTTCCACCTCGGGGGACTCAATAGTTTCCACATCAATGCCTAGATCCTCTGCG  
rabbit -----

human ATGAAAAAGATTGAGTCTGAGACAACCTTCTCCCTGATATTTAGACTGAGGGAGACTAGC  
rabbit -----

human ACCTCCCAGAAAATTGGCTCATCCTCAGACACAAGCACGGTCTTTGACAAAGCATTCACT  
rabbit -----



human GCTGCTACTACTGAGGTCTCCAGAACAGAACTCACCTCCTCTAGCAGAACATCCATCCAA  
rabbit -----

human GGGACTGAAAAGCCCACAATGTCACCGGACACCTCCACAAGATCTGTCACCATGCTTTCT  
rabbit -----

human ACTTTTGCTGGCCTGACAAAATCCGAAGAAAGGACCATTGCCACCCAAACAGGTCTCAT  
rabbit -----

human AGGGCGACATCACAGGGTACCCTTACCTGGGACACATCAATCACAACCTCACAGGCAGGG  
rabbit -----

human ACCCACTCAGCTATGACTCATGGATTTTCACAATTAGATTTGTCCACTCTTACGAGTAGA  
rabbit -----

human GTTCCTGAGTACATATCAGGGACAAGCCCACCCTCTGTGGAAAAAACCAGCTCTTCCTCT  
rabbit -----

human TCCCTTCTGTCTTTACCAGCAATAACCTCACCGTCCCCTGTACCTACTACATTACCAGAA  
rabbit -----

human AGTAGGCCGTCTTCTCCTGTTTCATCTGACTTCACTCCCACCTCTGGCCTAGTGAAGACC  
rabbit -----

human ACAGATATGCTGGCATCTGTGGCCAGTTTACCTCCAAACTTGGGCAGCACCTCACATAAG  
rabbit -----

human ATACCGACTACTTCAGAAGACATTAAGATACAGAGAAAATGTATCCTTCCACAAACATA  
rabbit -----

human GCAGTAACCAATGTGGGACCACCACTTCTGAAAAGGAATCTTATTCGTCTGTCCAGCC  
rabbit -----

human TACTCAGAACCACCCAAAGTCACCTCTCCAATGGTTACCTCTTTCAACATAAGGGACACC  
rabbit -----

human ATTGTTCCACATCCATGCCTGGCTCCTCTGAGATTACAAGGATTGAGATGGAGTCAACA  
rabbit -----

human TTCTCCCTGGCTCATGGGCTGAAGGGAACCAGCACCTCCCAGGACCCCATCGTATCCACA  
rabbit -----

human GAGAAAAGTGCTGTCCTTACAAGTTGACCACTGGTGCTACTGAGACCTCTAGGACAGAA  
rabbit -----

human GTTGCCTCTTCTAGAAGAACATCCATTCCAGGCCCTGATCATTCCACAGAGTCACCAGAC  
rabbit -----

human ATCTCCACTGAAGTGATCCCCAGCCTGCCTATCTCCCTTGGCATTACAGAATCTTCAAAT  
rabbit -----

human ATGACCATCATCACTCGAACAGGTCTCCTCTTGGCTCTACATCACAGGGCACATTTACC  
rabbit -----

human TTGGACACACCAACTACATCCTCCAGGGCAGGAACACACTCGATGGCGACTCAGGAATTT  
rabbit -----

human CCACACTCAGAAATGACCACTGTCATGAACAAGGACCCTGAGATTCTATCATGGACAATC  
rabbit -----

human CCTCCTTCTATAGAGAAAACCAGCTTCTCCTCTTCCCTGATGCCTTCACCAGCCATGACT  
rabbit -----

human TCACCTCCTGTTTCTCAACATTACCAAAGACCATTACACCACTCCTTCTCCTATGACC  
rabbit -----

human TCACTGCTCACCCCTAGCCTAGTGATGACCACAGACACATTGGGCACAAGCCCAGAACCT  
rabbit -----

human ACAACCAGTTCACCTCCAAATTTGAGCAGTACCTCACATGAGATACTGACAACAGATGAA  
rabbit -----

human GACACCACAGCTATAGAAGCCATGCATCCTTCCACAAGCACAGCAGCGACTAATGTGGAA  
rabbit -----

human ACCACCAGTTCTGGACATGGGTCAACAATCCTCTGTCCTAGCTGACTCAGAAAAACCAAG  
rabbit -----

human GCCACAGCTCCAATGGATACCACCTCCACCATGGGGCATACAACCTGTTTCCACATCAATG  
rabbit -----

human TCTGTTTCCTCTGAGACTACAAAAATTAAGAGAGAGTCAACATATTCCTTGACTCCTGGA  
rabbit -----

human CTGAGAGAGACCAGCATTTCCTCAAAATGCCAGCTTTTCCACTGACACAAGTATTGTTCTT  
rabbit -----

human TCAGAAGTCCCCACTGGTACTACTGCTGAGGTCTCCAGGACAGAAGTCACTCCTCTGGT  
rabbit -----

human AGAACATCCATCCCTGGCCCTTCTCAGTCCACAGTTTTGCCAGAAATATCCACAAGAACA  
rabbit -----

human ATGACAAGGCTCTTTGCCTCGCCACCATGACAGAATCAGCAGAAATGACCATCCCCACT  
rabbit -----

human CAAACAGGTCCTTCTGGGTCTACCTCACAGGATACCCTTACCTTGGACACATCCACCACA  
rabbit -----

human AAGTCCCAGGCAAAGACTCATTCAACTTTGACTCAGAGATTTCCACACTCAGAGATGACC  
rabbit -----

human ACTCTCATGAGCAGAGGTCTGGAGATATGTCATGGCAAAGCTCTCCCTCTCTGGAAAAT  
rabbit -----

human CCCAGCTCTCTCCCTTCCCTGCTGTCTTTACCTGCCACAACCTCACCTCCTCCATTTC  
rabbit -----

human TCCACATTACCAGTGACTATCTCCTCCTCCTCCTCCTGTGACTTCACTTCTCACCTCT  
rabbit -----

human AGCCCGGTAACGACCACAGACATGTTACACACAAGCCCAGAACTTGTAAACCAGTTCACCT  
rabbit -----

human CCAAAGCTGAGCCACACTTCAGATGAGAGACTGACCACTGGCAAGGACACCACAAATACA  
rabbit -----

human GAAGCTGTGCATCCTTCCACAAACACAGCAGCGTCCAATGTGGAGATTCCCAGCTCTGGA  
rabbit -----

human CATGAATCCCCTTCTCTGCCTTAGCTGACTCAGAGACATCCAAGCCACATCACCAATG  
rabbit -----

human TTTATTACCTCCACCCAGGAGGATACAACCTGTTGCCATATCAACCCCTCACTTCTTGGAG  
rabbit -----

human ACTAGCAGAATTCAGAAAGAGTCAATTTCTCCCTGAGCCCTAAATTGAGGGAGACAGGC  
rabbit -----

human AGTTCTGTGGAGACAAGCTCAGCCATAGAGACAAGTGCTGTCTTTCTGAAGTGTCCATT  
rabbit -----

human GGTGCTACTACTGAGATCTCCAGGACAGAAGTCACCTCCTCTAGCAGAACATCCATCTCT  
rabbit -----

human GGTCTGCTGAGTCCACAATGTTGCCAGAAATATCCACCACAAGAAAAATCATTAAGTTC  
rabbit -----

human CCTACTTCCCCATCCTGGCAGAATCATCAGAAATGACCATCAAGACCCAAACAAGTCT  
rabbit -----

human CCTGGGTCTACATCAGAGAGTACCTTTACATTAGACACATCAACCACTCCCTCCTTGTA  
rabbit -----

human ATAACCCATTGACTATGACTCAGAGATTGCCACACTCAGAGATAACCACTCTTGAGT  
rabbit -----

human AGAGGTGCTGGGGATGTGCCACGGCCCAGCTCTCTCCCTGTGGAAGAAACAAGCCCTCA  
rabbit -----

human TCTTCCAGCTGTCTTTATCTGCCATGATCTCACCTTCTCCTGTTTCTTCCACATTACCA  
rabbit -----

human GCAAGTAGCCACTCCTCTTCTGCTTCTGTGACTTCACTTCTCACACCAGGCCAAGTGAAG  
rabbit -----

human ACTACTGAGGTGTTGGACGCAAGTGCAGAACCTGAAACCAGTTCACCTCCAAGTTTGAGC  
rabbit -----

human AGCACCTCAGTTGAAATACTGGCCACCTCTGAAGTCACCACAGATACGGAGAAAATTCAT  
rabbit -----

human CCTTTCTCAAACACGGCAGTAACCAAAGTTGGAACCTCCAGTTCTGGACATGAATCCCCT  
rabbit -----

human TCCTCTGTCCCTACCTGACTCAGAGACAACCAAAGCCACATCGGCAATGGGTACCATCTCC  
rabbit -----

human ATTATGGGGGATACAAGTGTTTCTACATTAACCTCCTGCCTTATCTAACACTAGGAAAATT  
rabbit -----

human CAGTCAGAGCCAGCTTCCTCACTGACCACCAGATTGAGGGAGACCAGCACCTCTGAAGAG  
rabbit -----

human ACCAGCTTAGCCACAGAAGCAAACACTGTTCTTTCTAAAGTGCCACTGGTGCTACTACT  
rabbit -----

human GAGGTCTCCAGGACAGAAGCCATCTCCTTTAGCAGAACATCCATGTCAGGCCCTGAGCAG  
rabbit -----

human TCCACAATGTCACAAGACATCTCCATAGGAACCATCCCAGGATTTCTGCCTCCTCTGTC  
rabbit -----

human CTGACAGAATCTGCAAAAATGACCATCACAACCCAAACAGGTCCCTTCGGAGTCTACACTA  
rabbit -----

human GAAAGTACCCTTAATTTGAACACAGCAACCACACCCTCTTGGGTGGAAACCCACTCTATA  
rabbit -----

human           GTAATTCAGGGATTTCCACACCCAGAGATGACCACTTCATGGGCAGAGGTCCCTGGAGGT  
rabbit           -----

human           GTGTCATGGCCTAGCCCTCCCTTTGTGAAAGAAACCAGCCCTCCATCCTCCCCGCTGTCT  
rabbit           -----

human           TTACCTGCCGTGACCTCACCTCATCTGTTCCACCACATTCTAGCACATATCCCCCCC  
rabbit           -----

human           TCTCCCCTTCCTGTGACTTCACTTCTCACCTCTGGCCCGGCGACAACCACAGATATCTTG  
rabbit           -----

human           GGTACAAGCACAGAACCTGGAACCAGTTCATCTTCAAGTTTGAGCACCACTCCCATGAG  
rabbit           -----

human           AGACTGACCACTTACAAAGACACTGCACATACAGAAGCCGTGCATCCTTCCACAAACACA  
rabbit           -----

human           GGAGGGACCAATGTGGCAACCACCAGCTCTGGATATAAATCACAGTCCTCTGCCTAGCT  
rabbit           -----

human           GACTCATCTCCAATGTGTACCACCTCCACCATGGGGGATACAAGTGTCTCACATCAACT  
rabbit           -----

human           CCTGCCTTCCTTGAGACTAGGAGGATTGACACAGAGCTAGCTTCCTCCCTGACCCCTGGA  
rabbit           -----



human TTAGGGGAGTCCAGCGGCTCTGAAGGGACCAGCTCAGGCACCAAGATGAGCACTGTCCTC  
rabbit -----

human TCTAAAGTGCCCACTGGTGCTACTACTGAGATCTCCAAGGAAGACGTCACCTCCATCCCA  
rabbit -----

human GGTCCCGCTCAATCCACAATATCACCAGACATCTCCACAAGAACCGTCAGCTGGTTCTCT  
rabbit -----

human ACATCCCCTGTCATGACAGAATCAGCAGAAATAACCATGAACACCCATACAAGTCCTTTA  
rabbit -----

human GGGGCCACAACACAAGGCACCAGTACTTTGGACACGTCAAGCACAACCTCTTTGACAATG  
rabbit -----

human ACACACTCAACTATATCTCAAGGATTTTCACACTCACAGATGAGCACTCTTATGAGGAGG  
rabbit -----

human GGTCTGAGGATGTATCATGGATGAGCCCTCCCCTTCTGGAAAAAACTAGACCTTCCTTT  
rabbit -----

human TCTCTGATGTCTTCACCAGCCACAACCTCACCTTCTCCTGTTTCCTCCACATTACCAGAG  
rabbit -----

human AGCATCTCTCCTCTCCTCTTCTGTGACTTCACTCCTCACGTCTGGCTTGGCAAAAAC  
rabbit -----

human ACAGATATGTTGCACAAAAGCTCAGAACCTGTAACCAACTCACCTGCAAATTTGAGCAGC  
rabbit -----

human ACCTCAGTTGAAATACTGGCCACCTCTGAAGTCACCACAGATACAGAGAAAACCTCATCCT  
rabbit -----

human TCTTCAAACAGAACAGTGACCGATGTGGGGACCTCCAGTTCTGGACATGAATCCACTTCC  
rabbit -----

human TTTGTCCTAGCTGACTCACAGACATCCAAAGTCACATCTCCAATGGTTATTACCTCCACC  
rabbit -----

human ATGGAGGATACGAGTGTCTCCACATCAACTCCTGGCTTTTTTGAGACTAGCAGAATTCAG  
rabbit -----

human ACAGAACCAACATCCTCCCTGACCCTTGGACTGAGAAAGACCAGCAGCTCTGAGGGGACC  
rabbit -----

human AGCTTAGCCACAGAGATGAGCACTGTCCTTTCTGGAGTGCCCACTGGTGCCACTGCTGAA  
rabbit -----

human GTCTCCAGGACAGAAGTCACCTCCTCTAGCAGAACATCCATCTCAGGCTTTGCTCAGCTC  
rabbit -----

human ACAGTGTACCAGAGACTTCCACAGAAACCATCACCAGACTCCCTACCTCCAGCATAATG  
rabbit -----

human ACAGAATCAGCAGAAATGATGATCAAGACACAAACAGATCCTCCTGGGTCTACACCAGAG  
rabbit -----

human AGTACTCATACTGTGGACATATCAACAACACCCAACTGGGTAGAAACCCACTCGACTGTG  
rabbit -----

human ACTCAGAGATTTTCACTCAGAGATGACCACTCTTGTGAGCAGAAGCCCTGGTGATATG  
rabbit -----

human TTATGGCCTAGTCAATCCTCTGTGGAAGAAACCAGCTCTGCCTCTCCCTGCTGTCTCTG  
rabbit -----

human CCTGCCACGACCTCACCTTCTCCTGTTTCCTCTACATTAGTAGAGGATTTCCCTCCGCT  
rabbit -----

human TCTCTTCTGTGACTTCTTCTCAACCCTGGCCTGGTGATAACCACAGACAGGATGGGC  
rabbit -----

human ATAAGCAGAGAACCTGGAACCAGTTCCACTTCAAATTTGAGCAGCACCTCCCATGAGAGA  
rabbit -----

human CTGACCACTTTGGAAGACTGTAGATACAGAAGACATGCAGCCTTCCACACACACAGCA  
rabbit -----

human GTGACCAACGTGAGGACCTCCATTTCTGGACATGAATCACAATCTTCTGTCTATCTGAC  
rabbit -----

human TCAGAGACACCCAAAGCCACATCTCCAATGGGTACCACCTACACCATGGGGAAACGAGT  
rabbit -----

human GTTTCATATCCACTTCTGACTTCTTTGAGACCAGCAGAATTCAGATAGAACCAACATCC  
rabbit -----

human TCCCTGACTTCTGGATTGAGGGAGACCAGCAGCTCTGAGAGGATCAGCTCAGCCACAGAG  
rabbit -----

human GGAAGCACTGCCTTTCTGAAGTGCCAGTGGTGCTACCACTGAGGTCTCCAGGACAGAA  
rabbit -----

human GTGATATCCTCTAGGGGAACATCCATGTCAGGGCCTGATCAGTTCACCATATCACCAGAC  
rabbit -----

human ATCTCTACTGAAGCGATCACCAGGCTTCTACTTCCCCATTATGACAGAATCAGCAGAA  
rabbit -----

human AGTGCCATCACTATTGAGACAGGTTCTCCTGGGGCTACATCAGAGGGTACCCTCACCTTG  
rabbit -----

human GACACCTCAACAACAACCTTTTGGTCAGGGACCCACTCAACTGCATCTCCAGGATTTTCA  
rabbit -----

human CACTCAGAGATGACCACTCTTATGAGTAGAACTCCTGGAGATGTGCCATGGCCGAGCCTT  
rabbit -----

human CCCTCTGTGGAAGAAGCCAGCTCTGTCTCTTCCTCACTGTCTTCACCTGCCATGACCTCA  
rabbit -----

human ACTTCTTTTTTCTCCACATTACCAGAGAGCATCTCCTCCTCTCCTCATCCTGTGACTGCA  
rabbit -----

human CTTCTCACCCTTGGCCCAGTGAAGACCACAGACATGTTGCGCACAAGCTCAGAACCTGAA  
rabbit -----

human ACCAGTTCACCTCCAAATTTGAGCAGCACCTCAGCTGAAATATTAGCCACGTCTGAAGTC  
rabbit -----

human ACCAAAGATAGAGAGAAAATTCATCCCTCCTCAAACACACCTGTAGTCAATGTAGGGACT  
rabbit -----

human GTGATTTATAAACATCTATCCCCTTCCTCTGTTTTGGCTGACTTAGTGACAACAAAACCC  
rabbit -----

human ACATCTCCAATGGCTACCACCTCCACTCTGGGAATACAAGTGTTCACATCAACTCCT  
rabbit -----

human GCCTTCCAGAAACTATGATGACACAGCCAACCTTCCTCCCTGACTTCTGGATTAAGGGAG  
rabbit -----

human ATCAGTACCTCTCAAGAGACCAGCTCAGCAACAGAGAGAAGTGCTTCTCTTTCTGGAATG  
rabbit -----

human CCCACTGGTGCTACTACTAAGGTCTCCAGAACAGAAGCCCTCTCCTTAGGCAGAACATCC  
rabbit -----

human ACCCCAGGTCCTGCTCAATCCACAATATCACCAGAAATCTCCACGGAAACCATCACTAGA  
rabbit -----

human ATTTCTACTCCCCTCACCACGACAGGATCAGCAGAAATGACCATACCCCCAAAACAGGT  
rabbit -----

human CATTCTGGGGCATCCTCACAAGGTACCTTTACCTTGGACACATCAAGCAGAGCCTCCTGG  
rabbit -----

human CCAGGAACTCACTCAGCTGCAACTCACAGATCTCCACACTCAGGGATGACCACTCCTATG  
rabbit -----

human AGCAGAGGTCCTGAGGATGTGTCATGGCCAAGCCGCCATCAGTGGAAAAAACTAGCCCT  
rabbit -----

human CCATCTTCCCTGGTGTCTTTATCTGCAGTAACCTCACCTTCGCCACTTTATTCCACACCA  
rabbit -----

human TCTGAGAGTAGCCACTCATCTCCTCTCCGGGTGACTTCTCTTTTACCCCTGTCATGATG  
rabbit -----

human AAGACCACAGACATGTTGGACACAAGCTTGAACCTGTGACCACTTCACCTCCCAGTATG  
rabbit -----

human AATATCACCTCAGATGAGAGTCTGGCCACTTCTAAAGCCACCATGGAGACAGAGGCAATT  
rabbit -----

human CAGCTTTCAGAAAACACAGCTGTGACTCAGATGGGCACCATCAGCGCTAGACAAGAATTC  
rabbit -----

human TATTCCTCTTATCCAGGCCTCCAGAGCCATCCAAAGTGACATCTCCAGTGGTCACCTCT  
rabbit -----

human TCCACCATAAAAGACATTGTTTCTACAACCATACCTGCTTCCTCTGAGATAACAAGAATT  
rabbit -----

human GAGATGGAGTCAACATCCACCCTGACCCCCACACCAAGGGAGACCAGCACCTCCCAGGAG  
rabbit -----

human ATCCACTCAGCCACAAAGCCAAGCACTGTTCTTACAAGGCACTCACTAGTGCCACGATT  
rabbit -----

human GAGGACTCCATGACACAAGTCATGTCCTCTAGCAGAGGACCTAGCCCTGATCAGTCCACA  
rabbit -----

human ATGTCACAAGACATATCCACTGAAGTGATCACCAGGCTCTCTACCTCCCCATCAAGACA  
rabbit -----

human GAATCTACAGAAATGACCATTACCACCCAAAACAGGTTCTCCTGGGGCTACATCAAGGGGT  
rabbit -----

human ACCCTTACCTTGGACACTTCAACAACCTTTATGTCAGGGACCCACTCAACTGCATCTCAA  
rabbit -----

human GGATTTTCACACTCACAGATGACCGCTTTATGAGTAGAACTCCTGGAGATGTGCCATGG  
rabbit -----

human CTAAGCCATCCCTCTGTGGAAGAAGCCAGCTCTGCCTCTTTCTCACTGTCTTCACCTGTC  
rabbit -----

human ATGACCTCATCTTCTCCCGTTTCTTCCACATTACCAGACAGCATCCACTCTTCTTGGCTT  
rabbit -----

human CCTGTGACATCACTTCTCACCTCAGGGCTGGTGAAGACCACAGAGCTGTTGGGCACAAGC  
rabbit -----

human TCAGAACCTGAAACCAGTTCACCCCAAATTTGAGCAGCACCTCAGCTGAAATACTGGCC  
rabbit -----

human ATCACTGAAGTCACTACAGATACAGAGAACTGGAGATGACCAATGTGGTAACCTCAGGT  
rabbit -----

human TATACACATGAATCTCCTCCTCTGTCCTAGCTGACTCAGTGACAACAAAGGCCACATCT  
rabbit -----

human TCAATGGGTATCACCTACCCACAGGAGATACAAATGTTCTCACATCAACCCCTGCCTTC  
rabbit -----



human TCTGACACCAGTAGGATTCAAACAAAGTCAAAGCTCTCACTGACTCCTGGGTTGATGGAG  
rabbit -----

human ACCAGCATCTCTGAAGAGACCAGCTCTGCCACAGAAAAAGCACTGTCTTTCTAGTGTG  
rabbit -----

human CCCACTGGTGCTACTACTGAGGTCTCCAGGACAGAAGCCATCTCTTAGCAGAACATCC  
rabbit -----

human ATCCCAGGCCCTGCTCAATCCACAATGTCATCAGACACCTCCATGGAAACCATCACTAGA  
rabbit -----

human ATTTCTACCCCCTCACAAGGAAAGAATCAACAGACATGGCCATACCCCCAAAACAGGT  
rabbit -----

human CCTTCTGGGGCTACCTCGCAGGGTACCTTTACCTTGGACTCATCAAGCACAGCCTCCTGG  
rabbit -----

human CCAGGAACTCACTCAGCTACAACCTCAGAGATTTCCACAGTCAGTGGTGACAACTCCTATG  
rabbit -----

human AGCAGAGGTCCTGAGGATGTGTCATGGCCAAGCCCGCTGTCTGTGGAAAAAACAGCCCT  
rabbit -----

human CCATCTTCCCTGGTATCTTCATCTTCAGTAACCTCACCTTCGCCACTTTATTCCACACCA  
rabbit -----

human TCTGGGAGTAGCCACTCCTCTCCTGTCCCTGTCACCTTCTCTTTTCACCTCTATCATGATG  
rabbit -----

human AAGGCCACAGACATGTTGGATGCAAGTTTGAACCTGAGACCACTTCAGCTCCCAATATG  
rabbit -----

human AATATCACCTCAGATGAGAGTCTGGCCGTTCTAAAGCCACCACGGAGACAGAGGAATT  
rabbit -----

human CACGTTTTTGAAAATACAGCAGCGTCCCATGTGGAACCACCAGTGCTACAGAGGAACTC  
rabbit -----

human TATTCCTCTTCCCAGGCTTCTCAGAGCCAACAAAAGTGATATCTCCAGTGGTCACCTCT  
rabbit -----

human TCCTCTATAAGAGACAACATGGTTTTCCACAACAATGCCTGGCTCCTCTGGCATTACAAGG  
rabbit -----

human ATTGAGATAGAGTCAATGTCATCTCTGACCCCTGGACTGAGGGAGACCAGAACCTCCCAG  
rabbit -----

human GACATCACCTCATCCACAGAGACAAGCACTGTCCTTTACAAGATGCCCTCTGGTGCCACT  
rabbit -----

human CCTGAGGTCTCCAGGACAGAAGTTATGCCCTCTAGCAGAACATCCATTCTGGCCCTGCT  
rabbit -----

human CAGTCCACAATGTCACTAGACATCTCCGATGAAGTTGTCACCAGGCTGTCTACCTCTCCC  
rabbit -----

human ATCATGACAGAATCTGCAGAAATAACCATCACCACCCAAACAGGTTATTCTCTGGCTACA  
rabbit -----

human TCCCAGGTTACCCTTCCCTTGGGCACCTCAATGACCTTTTTGTCAGGGACCCACTCAACT  
rabbit -----

human ATGTCTCAAGGACTTTCACACTCAGAGATGACCAATCTTATGAGCAGGGTCTGAAAGT  
rabbit -----

human CTGTCATGGACGAGCCCTCGCTTTGTGGAAACAACCTAGATCTTCCTCTTCTCTGACATCA  
rabbit -----

human TTACCTCTCAGGACCTCACTTCTCCTGTGTCTCCACATTACTAGACAGTAGCCCTCC  
rabbit -----

human TCTCCTCTTCTGTGACTTCACTTATCCTCCCAGGCCTGGTGAAGACTACAGAAGTGTTG  
rabbit -----

human GATACAAGCTCAGAGCCTAAAACCAGTTCATCTCCAAATTTGAGCAGCACCTCAGTTGAA  
rabbit -----

human ATACCGGCCACCTCTGAAATCATGACAGATACAGAGAAAATTCATCCTTCTCAAACACA  
rabbit -----

human GCGGTGGCCAAAGTGAGGACCTCCAGTTCTGTTTCATGAATCTCATTCCCTCTGCCTAGCT  
rabbit -----

human GACTCAGAAACAACCATAACCATACCTTCAATGGGTATCACCTCCGCTGTGGACGATACC  
rabbit -----

human ACTGTTTTACATCAAATCCTGCCTTCTCTGAGACTAGGAGGATTCCGACAGAGCCAACA  
rabbit -----

human TTCTCATTGACTCCTGGATTCAGGGAGACTAGCACCTCTGAAGAGACCACCTCAATCACA  
rabbit -----

human GAAACAAGTGCAGTCCTTTATGGAGTGCCCACTAGTGCTACTACTGAAGTCTCCATGACA  
rabbit -----

human GAAATCATGCCTCTAATAGAATACACATCCCTGACTCTGATCAGTCCACGATGTCTCCA  
rabbit -----

human GACATCATCACTGAAGTGATCACCAGGCTCTCTTCCTCATCCATGATGTCAGAATCAACA  
rabbit -----

human CAAATGACCATCACCACCCAAAAAAGTTCTCCTGGGGCTACAGCACAGAGTACTCTTACC  
rabbit -----

human TTGGCCACAACAACAGCCCCCTTGGAAGGACCCACTCAACTGTTCTCCTAGATTTTTA  
rabbit -----

human CACTCAGAGATGACAACCTTATGAGTAGGAGTCCTGAAAATCCATCATGGAAGAGCTCT  
rabbit -----

human CTCTTTGTGGAAAAAAGTAGCTCTTCATCTTCTCTGTTGTCCTTACCTGTCACGACCTCA  
rabbit -----

human CCTTCTGTTTCTTCCACATTACCGCAGAGTATCCCTTCCTCCTCTTTTTCTGTGACTTCA  
rabbit -----

human CTCCTCACCCAGGCATGGTGAAGACTACAGACACAAGCACAGAACCTGGAACCAGTTTA  
rabbit -----

human TCTCCAAATCTGAGTGGCACCTCAGTTGAAATACTGGCTGCCTCTGAAGTCACCACAGAT  
rabbit -----

human ACAGAGAAAATTCATCCTTCTTCAAGCATGGCAGTGACCAATGTGGGAACCACCAGTTCT  
rabbit -----

human GGACATGAACTATATTCCTCTGTTTCAATCCACTCGGAGCCATCCAAGGCTACATACCCA  
rabbit -----

human GTGGGTACTCCCTCTTCCATGGCTGAAACCTCTATTTCCACATCAATGCCTGCTAATTTT  
rabbit -----

human GAGACCACAGGATTTGAGGCTGAGCCATTTTCTCATTGACTTCTGGATTTAGGAAGACA  
rabbit -----

human AACATGTCCCTGGACACCAGCTCAGTCACACCAACAAATACACCTTCTTCTCCTGGGTCC  
rabbit -----

human ACTCACCTTTTACAGAGTTCCAAGACTGATTTACCTCTTCTGCAAAAACATCATCCCCA  
rabbit -----

human GACTGGCCTCCAGCCTCACAGTATACTGAAATTCCAGTGGACATAATCACCCCCTTTAAT  
rabbit -----

human GCTTCTCCATCTATTACGGAGTCCACTGGGATAACCTCCTTCCAGAATCCAGGTTTACT  
rabbit -----

human ATGTCTGTAACAGAAAGTACTCATCATCTGAGTACAGATTTGCTGCCTTCAGCTGAGACT  
rabbit -----

human ATTTCCACTGGCACAGTGATGCCTTCTCTATCAGAGGCCATGACTTCATTTGCCACCACT  
rabbit -----

human GGAGTTCCACGAGCCATCTCAGGTTCAGGTAGTCCATTCTCTAGGACAGAGTCAGGCCCT  
rabbit -----

human GGGGATGCTACTCTGTCCACCATTGCAGAGAGCCTGCCTTCATCCACTCCTGTGCCATTC  
rabbit -----

human TCCTCTTCAACCTTCACTACCACTGATTCTTCAACCATCCCAGCCCTCCATGAGATAACT  
rabbit -----

human TCCTCTTCAGCTACCCCATATAGAGTGGACACCAGTCTTGGGACAGAGAGCAGCACTACT  
rabbit -----

human GAAGGACGCTTGGTTATGGTCAGTACTTTGGACACTTCAAGCCAACCAGGCAGGACATCT  
rabbit -----

human TCATCACCCATTTTGGATACCAGAATGACAGAGAGCGTTGAGCTGGGAACAGTGACAAGT  
rabbit -----

human GCTTATCAAGTTCCTTCACTCTCAACACGGTTGACAAGAAGTATGGCATTATGGAACAC  
rabbit -----

human ATCACAAAAATACCCAATGAAGCAGCACACAGAGGTACCATAAGACCAGTCAAAGGCCCT  
rabbit -----

human CAGACATCCACTTCGCCTGCCAGTCTAAAGGACTACACACAGGAGGGACAAAAAGAATG  
rabbit -----

human GAGACCACCACCACAGCTCTGAAGACCACCACCACAGCTCTGAAGACCACTTCCAGAGCC  
rabbit -----

human ACCTTGACCACCAGTGTCTATACTCCCACTTTGGGAACACTGACTCCCCTCAATGCATCA  
rabbit -----

human ATGCAAATGGCCAGCACAAATCCCCACAGAAATGATGATCACAACCCCATATGTTTTCCCT  
rabbit -----

human GATGTTCCAGAAACGACATCCTCATTGGCTACCAGCCTGGGAGCAGAAACCAGCACAGCT  
rabbit -----

human CTTCCCAGGACAACCCCATCTGTTTTCAATAGAGAATCAGAGACCACAGCCTCACTGGTC  
rabbit -----

human TCTCGTTCTGGGGCAGAGAGAAGTCCGGTTATTCAAACCTCTAGATGTTTCTTCTAGTGAG  
rabbit -----

human CCAGATACAACAGCTTCATGGGTTATCCATCCTGCAGAGACCATCCCAACTGTTTCCAAG  
rabbit -----

human ACAACCCCAATTTTTTCCACAGTGAATTAGACACTGTATCTTCCACAGCCACCAGTCAT  
rabbit -----

human GGGGCAGACGTCAGCTCAGCCATTCCAACAAATATCTCACCTAGTGAACCTAGATGCACTG  
rabbit -----

human ACCCCACTGGTCACTATTTGGGGACAGATACTAGTACAACATTCCCAACACTGACTAAG  
rabbit -----

human TCCCCACATGAAACAGAGACAAGAACCACATGGCTCACTCATCCTGCAGAGACCAGCTCA  
rabbit -----

human ACTATTCCAGAAACAATCCCAATTTTTCTCATCATGAATCAGATGCCACACCTTCAATA  
rabbit -----



human GCCACCAGTCCTGGGGCAGAAACCAGTTCAGCTATTCCAATTATGACTGTCTCACCTGGT  
rabbit -----

human GCAGAAGATCTGGTGACCTCACAGGTCACTAGTTCTGGGACAGACAGAAATATGACTATT  
rabbit -----

human CCAACTTTGACTCTTTCTCCTGGTGAACCAAAGACGATAGCCTCATTAGTCACCCATCCT  
rabbit -----

human GAAGCACAGACAAGTTCGGCCATTCCAACCTCAACTATCTCGCCTGCTGTATCACGGTTG  
rabbit -----

human GTGACCTCAATGGTCACCAGTTTGGCGGCAAAGACAAGTACAACCTAATCGAGCTCTGACA  
rabbit -----

human AACTCCCCTGGTGAACCAGCTACAACAGTTTCATTGGTCACGCATCCTGCACAGACCAGC  
rabbit -----

human CCAACAGTTCCTGGACAACCTCCATTTTTTTCCATAGTAAATCAGACACCACACCTTCA  
rabbit -----

human ATGACCACCAGTCATGGGGCAGAATCCAGTTCAGCTGTTCCAACCTCCAACCTGTTTCAACT  
rabbit -----

human GAGGTACCAGGAGTAGTGACCCCTTGGTCAACAGTTCTAGGGCAGTGATCAGTACAACCT  
rabbit -----

human           ATTCCAATTCTGACTCTTTCTCCTGGTGAACCAGAGACCACACCTTCAATGGCCACCAGT  
rabbit           -----

human           CATGGGAAGAAGCCAGTTCTGCTATTCCAACCTCCAAGTGTTCACCTGGGGTACCAGGA  
rabbit           -----

human           GTGGTGACCTCTCTGGTCACTAGTTCTAGGGCAGTGACTAGTACAACCTATTCCAATTCTG  
rabbit           -----

human           ACTTTTTCTCTTGGTGAACCAGAGACCACACCTTCAATGGCCACCAGTCATGGGACAGAA  
rabbit           -----

human           GCTGGCTCAGCTGTTCCAACCTGTTTTACCTGAGGTACCAGGAATGGTGACCTCTCTGGTT  
rabbit           -----

human           GCTAGTTCTAGGGCAGTAACCAGTACAACCTCTTCCAACCTCTGACTCTTTCTCCTGGTGAA  
rabbit           -----

human           CCAGAGACCACACCTTCAATGGCCACCAGTCATGGGGCAGAAGCCAGCTCAACTGTTCCA  
rabbit           -----

human           ACTGTTTCACCTGAGGTACCAGGAGTGGTGACCTCTCTGGTCACTAGTTCTAGTGGAGTA  
rabbit           -----

human           AACAGTACAAGTATTCCAACCTCTGATTCTTTCTCCTGGTGAAGTAAAAACCACACCTTCA  
rabbit           -----

human ATGGCCACCAGTCATGGGGCAGAAGCCAGCTCAGCTGTTCCAACCTCCAACCTGTTTCACCT  
rabbit -----

human GGGGTATCAGGAGTGGTGACCCCTCTGGTCACTAGTTCAGGGCAGTGACCAGTACAACCT  
rabbit -----

human ATTCCAATTCTAACTCTTTCTTCTAGTGAGCCAGAGACCACACCTTCAATGGCCACCAGT  
rabbit -----

human CATGGGGTAGAAGCCAGCTCAGCTGTTCTAACTGTTTCACCTGAGGTACCAGGAATGGTG  
rabbit -----

human ACCTCTCTGGTCACTAGTCTAGAGCAGTAACCAGTACAACCTATTCCAACCTCTGACTATT  
rabbit -----

human TCTTCTGATGAACCAGAGACCACAACCTCATTGGTCACCCATTCTGAGGCAAAGATGATT  
rabbit -----

human TCAGCCATTCCAACCTTTAGCTGTCTCCCCTACTGTACAAGGGCTGGTGACTTCACTGGTC  
rabbit -----

human ACTAGTTCTGGGTGAGAGACCAGTGCGTTTTCAAATCTAACTGTTGCCTCAAGTCAACCA  
rabbit -----

human GAGACCATAGACTCATGGGTCGCTCATCCTGGGACAGAAGCAAGTTCTGTTGTTCCAACCT  
rabbit -----

human TTGACTGTCTCCACTGGTGAGCCGTTTACAAATATCTCATTGGTCACCCATCCTGCAGAG  
rabbit -----

human AGTAGCTCAACTCTTCCCAGGACAACCTCAAGGTTTTCCACAGTGAATTAGACACTATG  
rabbit -----

human CCTTCTACAGTCACCAGTCCTGAGGCAGAATCCAGCTCAGCCATTTCAACAAC TATTTCA  
rabbit -----

human CCTGGTATACCAGGTGTGCTGACATCACTGGTCACTAGCTCTGGGAGAGACATCAGTGCA  
rabbit -----

human ACTTTTCCAACAGTGCCTGAGTCCCCACATGAATCAGAGGCAACAGCCTCATGGGTTACT  
rabbit -----

human CATCCTGCAGTCACCAGCACAAACAGTCCCAGGACAACCCCTAATTATTCTCATAGTGAA  
rabbit -----

human CCAGACACCACACCATCAATAGCCACCAGTCCTGGGGCAGAAGCCACTTCAGATTTTCCA  
rabbit -----

human ACAATAACTGTCTCACCTGATGTACCAGATATGGTAACCTCACAGGTCAGTTCTGGG  
rabbit -----

human ACAGACACCAGTATAACTATTCCAACCTGACTCTTTCTTCTGGTGAGCCAGAGACCACA  
rabbit -----

human ACCTCATTATCACCTATTCTGAGACACACACAAGTTCAGCCATTCCAACCTCCCTGTC  
rabbit -----

human TCCCTGGTGCATCAAAGATGCTGACCTCACTGGTCATCAGTTCTGGGACAGACAGCACT  
rabbit -----

human ACAACTTTCCAACACTGACGGAGACCCCATATGAACCAGAGACAACAGCCATACAGCTC  
rabbit -----

human ATTCATCCTGCAGAGACCAACACAATGGTCCCAGGACAACCTCCAAGTTTTCCCATAGT  
rabbit -----

human AAGTCAGACACCACACTCCCAGTAGCCATCACCAGTCCTGGGCCAGAAGCCAGTTCAGCT  
rabbit -----

human GTTCAACGACAACCTATCTCACCTGATATGTCAGATCTGGTGACCTCACTGGTCCCTAGT  
rabbit -----

human TCTGGGACAGACACCAGTACAACCTTCCAACATTGAGTGAGACCCCATATGAACCAGAG  
rabbit -----

human ACTACAGCCACGTGGCTCACTCATCCTGCAGAAACCAGCACAACGGTTTCTGGGACAATT  
rabbit -----

human CCCAACTTTTCCCATAGGGGATCAGACACTGCACCCTCAATGGTCACCAGTCCTGGAGTA  
rabbit -----

human GACACGAGGTCAGGTGTTCCAACACTACAACCATCCCACCCAGTATACCAGGGGTAGTGACC  
rabbit -----

human TCACAGGTCAGTCTGCAACAGACACTAGTACAGCTATTCCAACCTTTGACTCCTTCT  
rabbit -----

human CCTGGTGAACCAGAGACCACAGCCTCATCAGCTACCCATCCTGGGACACAGACTGGCTTC  
rabbit -----

human ACTGTTCCAATTCGGACTGTTCCCTCTAGTGAGCCAGATACAATGGCTTCTGGGTCAGT  
rabbit -----

human CATCCTCCACAGACCAGCACACCTGTTTCCAGAACAACCTCCAGTTTTTCCCATAGTAGT  
rabbit -----

human CCAGATGCCACACCTGTAATGGCCACCAGTCCTAGGACAGAAGCCAGTTCAGCTGTAAGT  
rabbit -----

human ACAACAATCTCACCTGGTGCACCAGAGATGGTGACTTCACAGATCACTAGTTCTGGGGCA  
rabbit -----

human GCAACCAGTACAACCTGTTCCAACCTTTGACTCATTCTCCTGGTATGCCAGAGACCACAGCC  
rabbit -----

human TTATTGAGCACCCATCCCAGAACAGAGACAAGTAAACATTTCTGCTTCAACTGTGTTT  
rabbit -----

human CCTCAAGTATCAGAGACCACAGCCTCACTCACCATTAGACCTGGTGCAGAGACTAGCACA  
rabbit -----

human GCTCTCCCAACTCAGACAACATCCTCTCTTCCACCTACTTGTAAGTGAACCCAGCAGA  
rabbit -----

human GTTGATCTAAGTCCAAGTGGTTCACCTGGTGTCTGCAAAAACAGCCCCACTTCCACC  
rabbit -----

human CATCCAGGGACAGAAACCAGCACAATGATTCCAAGTCAACTCTTCCCTTGGTTACTA  
rabbit -----

human GAGACTACAGGCTTACTGGCCACCAGCTTTCAGCAGAGACCAGCAGGAGTACTCTAACT  
rabbit -----

human CTGACTGTTTCCCTGCTGTCTCTGGGCTTTCAGTGCCTCTATAACAAGTATAAGCCC  
rabbit -----

human CAAACTGTGACCTCCTGGAACACAGAAACCTCACCATCTGTAAGTTCAGTTGGACCCCA  
rabbit -----

human GAATTTTCCAGGACTGTCACAGGCACCACTATGACCTTGATACCATCAGAGATGCCAACA  
rabbit -----

human CCACCTAAAACAGTCATGGAGAAGGAGTGAGTCCAACCACTATCTTGAGAACTACAATG  
rabbit -----

human GTTGAAGCCACTAATTTAGCTACCACAGGTTCCAGTCCCCTGTGGCCAAGACAACAACC  
rabbit -----

human ACCTTCAATACACTGGCTGGAAGCCTCTTACTCCTCTGACCACACCTGGGATGTCCACC  
rabbit -----

human TTGGCCTCTGAGAGTGTGACCTCAAGAACAAGTTATAACCATCGGTCTGGATCTCCACC  
rabbit -----

human ACCAGCAGTTATAACCGTCGGTACTGGACCCCTGCCACCAGCACTCCAGTGA CTCTACA  
rabbit -----

human TTCTCCCAGGGATTTCCACATCCTCCATCCCAGCTCCACAGCAGCCACAGTCCCATT  
rabbit -----

human ATGGTGCCATTACCCTCAACTTCACCATCACCAACCTGCAGTACGAGGAGGACATGCGG  
rabbit -----

human CACCCTGGTTCAGGAAGTTCAACGCCACAGAGAGAGAACTGCAGGGTCTGCTCAAACCC  
rabbit -----

human TTGTTCAGGAATAGCAGTCTGGAATACCTCTATT CAGGCTGCAGACTAGCCTCACTCAGG  
rabbit -----

human CCAGAGAAGGATAGCTCAGCCACGGCAGTGGATGCCATCTGCACACATCGCCCTGACCCT  
rabbit -----



human GAAGACCTCGGACTGGACAGAGAGCGACTGTACTGGGAGCTGAGCAATCTGACAAATGGC  
rabbit -----

human ATCCAGGAGCTGGGCCCTACACCCTGGACCGGAACAGTCTCTATGTCAATGGTTTCACC  
rabbit -----

human CATCGAAGCTCTATGCCACCACCAGCACTCCTGGGACCTCCACAGTGGATGTGGGAACC  
rabbit -----

human TCAGGGACTCCATCCTCCAGCCCCAGCCCCAGCACTGCTGGCCCTCTCCTGATGCCGTTCC  
rabbit -----

human ACCCTCAACTTCACCATCACCAACCTGCAGTACGAGGAGGACATGCGTCGCACTGGCTCC  
rabbit -----

human AGGAAGTTCAACACCATGGAGAGTGCCTGCAGGGTCTGCTCAAGCCCTTGTTCAAGAAC  
rabbit -----

human ACCAGTGTGGCCCTCTGTACTCTGGCTGCAGATTGACCTTGCTCAGGCCCGAGAAAGAT  
rabbit -----

human GGGGCAGCCACTGGAGTGGATGCCATCTGCACCCACCGCCTTGACCCAAAAGCCCTGGA  
rabbit -----

human CTC AACAGGGAGCAGCTGTACTGGGAGCTAAGCAA CTGACCAATGACATTGAAGAGCTG  
rabbit -----

human GGGCCCTACACCCTGGACAGGAACAGTCTCTATGTCAATGGTTTCACCCATCAGAGCTCT  
rabbit -----

human GTGTCCACCACCAGCACTCCTGGGACCTCCACAGTGGATCTCAGAACCTCAGGGACTCCA  
rabbit -----

human TCCTCCCTCTCCAGCCCCACAATTATGGCTGCTGGCCCTCTCCTGGTACCATTACCCTC  
rabbit -----

human AACTTCACCATCACCAACCTGCAGTATGGGGAGGACATGGGTCACCCTGGCTCCAGGAAG  
rabbit -----

human TTCAACACCACAGAGAGGGTCTGCAGGGTCTGCTTGGTCCCATATTCAAGAACCAGT  
rabbit -----

human GTTGGCCCTCTGTACTCTGGCTGCAGACTGACCTCTCTCAGGTCTGAGAAGGATGGAGCA  
rabbit -----

human GCCACTGGAGTGGATGCCATCTGCATCCATCATCTTGACCCCAAAGCCCTGGACTCAAC  
rabbit -----

human AGAGAGCGGCTGTACTGGGAGCTGAGCCAAGTACCAATGGCATCAAAGAGCTGGGCCCC  
rabbit -----

human TACACCCTGGACAGGAACAGTCTCTATGTCAATGGTTTCACCCATCGGACCTCTGTGCC  
rabbit -----

human ACCAGCAGCACTCCTGGGACCTCCACAGTGGACCTGGAACCTCAGGGACTCCATTCTCC  
rabbit -----

human CTCCAAGCCCCGCAACTGCTGGCCCTCCTGGTGTGTTACCCCTCAACTTCACCATC  
rabbit -----

human ACCAACCTGAAGTATGAGGAGGACATGCATCGCCCTGGCTCCAGGAAGTTCAACACCACT  
rabbit -----

human GAGAGGGTCTGCAGACTCTGCTTGGTCCTATGTTCAAGAACACCAGTGTGGCCTTCTG  
rabbit -----

human TACTCTGGCTGCAGACTGACCTTGCTCAGGTCCGAGAAGGATGGAGCAGCCACTGGAGTG  
rabbit -----

human GATGCCATCTGCACCCACCGTCTTGACCCAAAAGCCCTGGAGTGGACAGGGAGCAGCTA  
rabbit -----

human TACTGGGAGCTGAGCCAGCTGACCAATGGCATCAAAGAGCTGGGCCCTACACCCTGGAC  
rabbit -----

human AGGAACAGTCTCTATGTCAATGGTTTCACCCATTGGATCCCTGTGCCACCAGCAGCACT  
rabbit -----

human CCTGGGACCTCCACAGTGGACCTTGGGTGAGGGACTCCATCCTCCCTCCCAGCCCCACA  
rabbit -----

human ACTGCTGGCCCTCTCCTGGTGCCGTTACCCCTCAACTTCACCATCACCAACCTGAAGTAC  
rabbit -----

human GAGGAGGACATGCATTGCCCTGGCTCCAGGAAGTTCAACACCACAGAGAGATCCTGCAG  
rabbit -----

human AGTCTGCTTGGTCCCATGTTCAAGAACACCAGTGTGGCCCTCTGTA CTCTGGCTGCAGA  
rabbit -----

human CTGACCTTGCTCAGGTCCGAGAAGGATGGAGCAGCCACTGGAGTGGATGCCATCTGCACC  
rabbit -----

human CACCGTCTTGACCCCAAAGCCCTGGAGTGGACAGGGAGCAGCTATACTGGGAGCTGAGC  
rabbit -----

human CAGCTGACCAATGGCATCAAAGAGCTGGGTCCCTACACCCTGGACAGAAACAGTCTCTAT  
rabbit -----

human GTCAATGGTTTACCCATCAGACCTCTGCGCCCAACACCAGCACTCCTGGGACCTCCACA  
rabbit -----

human GTGGACCTTGGGACCTCAGGGACTCCATCCTCCCTCCCAGCCCTACATCTGCTGGCCCT  
rabbit -----

human CTCCTGGTGCCATTACCCCTCAACTTCACCATCACCAACCTGCAGTACGAGGAGGACATG  
rabbit -----

human CATCACCCAGGCTCCAGGAAGTTCAACACCACGGAGCGGGTCCTGCAGGGTCTGCTTGGT  
rabbit -----

human CCCATGTTCAAGAACACCAGTGTGGCCTTCTGTACTCTGGCTGCAGACTGACCTTGCTC  
rabbit -----

human AGGCCTGAGAAGAATGGGGCAGCCACTGGAATGGATGCCATCTGCAGCCACCGTCTTGAC  
rabbit -----

human CCCCCAAGCCCTGGACTCAACAGAGAGCAGCTGTACTGGGAGCTGAGCCAGCTGACCCAT  
rabbit -----

human GGCATCAAAGAGCTGGGCCCTACACCCTGGACAGGAACAGTCTCTATGTCAATGGTTTC  
rabbit -----

human ACCCATCGGAGCTCTGTGGCCCCACCAGCACTCCTGGGACCTCCACAGTGGACCTTGGG  
rabbit -----

human ACCTCAGGGACTCCATCCTCCCTCCCCAGCCCCACAACAGCTGTTCTCCTCCTGGTGCCG  
rabbit -----

human TTCACCCTCAACTTTACCATCACCAATCTGCAGTATGGGGAGGACATGCGTCACCCTGGC  
rabbit -----

human TCCAGGAAGTTCAACACCACAGAGAGGGTCCTGCAGGGTCTGCTTGGTCCCTTGTTC AAG  
rabbit -----

human AACTCCAGTGTGGCCCTCTGACTCTGGCTGCAGACTGATCTCTCAGGTCTGAGAAG  
rabbit -----

human GATGGGGCAGCCACTGGAGTGGATGCCATCTGCACCCACCACCTTAACCCTCAAAGCCCT  
rabbit -----

human GGACTGGACAGGGAGCAGCTGACTGGCAGCTGAGCCAGATGACCAATGGCATCAAAGAG  
rabbit -----

human CTGGGCCCCTACACCCTGGACCGGAACAGTCTCTACGTC AATGGTTTCACCCATCGGAGC  
rabbit -----

human TCTGGGCTCACCACCAGCACTCCTTGGACTTCCACAGTTGACCTTGG AACCTCAGGGACT  
rabbit -----

human CCATCCCCGTCCCCAGCCCCACAACCACGGCCCTCTCCTGGTGCCATT CACTCAAC  
rabbit -----

human TTCACCATCACTAACCTACAGTATGAGGAGAACATGGGT CACCCTGGCTCCAGGAAGTTC  
rabbit -----

human AACATCACGGAGAGTGTTCTGCAGGGTCTGCTCAAGCCCTTGTTCAAGAGCACCAGTGTT  
rabbit -----

human GGCCCTCTGTATTCTGGCTGCAGACTGACCTTGCTCAGGCCTGAGAAGGATGGAGTAGCC  
rabbit -----

human ACCAGAGTGGACGCCATCTGCACCCACCGCCCTGACCCAAAATCCCTGGGCTAGACAGA  
rabbit -----

human CAGCAGCTATACTGGGAGCTGAGCCAGCTGACCCACAGCATCACTGAGCTGGGACCCTAC  
rabbit -----

human ACCCTGGATAGGGACAGTCTCTATGTCAATGGTTTCACCCAGCGGAGCTCTGTGCCACC  
rabbit -----

human ACCAGCACTCCTGGGACTTTCACAGTACAGCCGAAACCTCTGAGACTCCATCATCCCTC  
rabbit -----

human CCTGGCCCCACAGCCACTGGCCCTGTCCTGCTGCCATTACCCTCAATTTTACCATCACT  
rabbit -----

human AACCTGCAGTATGAGGAGGACATGCGTCGCCCTGGCTCCAGGAAGTTCAACACCACGGAG  
rabbit -----

human AGGGTCCTTCAGGGTCTGCTTATGCCCTTGTTCAAGAACACCAGTGTGAGCTCTCTGTAC  
rabbit -----

human TCTGTTGCAGACTGACCTTGCTCAGGCCTGAGAAGGATGGGGCAGCCACCAGAGTGGAT  
rabbit -----

human GCTGTCTGCACCCATCGTCCTGACCCAAAAGCCCTGGACTGGACAGAGAGCGGCTGTAC  
rabbit -----

human TGG AAGCTGAGCCAGCTGACCCACGGCATCACTGAGCTGGGCCCTACACCCTGGACAGG  
rabbit -----

human CACAGTCTCTATGTCAATGGTTTCACCCATCAGAGCTCTATGACGACCACCAGAACTCCT  
rabbit -----

human GATACCTCCACAATGCACCTGGCAACCTCGAGAACTCCAGCCTCCCTGTCTGGACCCATG  
rabbit -----

human ACCGCCAGCCCTCTCCTGGTGCTATTCAACAATTAACCTCACCATCACTAACCTGCGGTAT  
rabbit -----

human GAGGAGAACATGCATCACCCCTGGCTCTAGAAAGTTTAACACCACGGAGAGAGTCCTTCAG  
rabbit -----

human GGTCTGCTCAGGCCTGTGTTCAAGAACACCAGTGTGGCCCTCTGTA CTCTGGCTGCAGA  
rabbit -----

human CTGACCTTGCTCAGGCCCAAGAAGGATGGGGCAGCCACCAAAGTGGATGCCATCTGCACC  
rabbit -----

human TACCGCCTGATCCCAAAGCCCTGGACTGGACAGAGAGCAGCTATACTGGGAGCTGAGC  
rabbit -----

human CAGCTGACCCACAGCATCACTGAGCTGGGCCCTACACCCTGGACAGGGACAGTCTCTAT  
rabbit -----



human GTCAATGGTTTCACACAGCGGAGCTCTGTGCCACCACTAGCATTCTGGGACCCCCACA  
rabbit -----

human GTGGACCTGGGAACATCTGGGACTCCAGTTTCTAACCTGGTCCCTCGGCTGCCAGCCCT  
rabbit -----

human CTCCTGGTGCTATTCACTCTCAACTTCACCATCACCAACCTGCGGTATGAGGAGAACATG  
rabbit -----

human CAGCACCTGGCTCCAGGAAGTTCAACACCACGGAGAGGGTCCTCAGGGCCTGCTCAGG  
rabbit -----

human TCCCTGTTCAAGAGCACCAGTGTGGCCCTCTGTACTCTGGCTGCAGACTGACTTTGCTC  
rabbit -----

human AGGCCTGAAAAGGATGGGACAGCCACTGGAGTGGATGCCATCTGCACCCACCACCCTGAC  
rabbit -----

human CCCCCAAGCCCTAGGCTGGACAGAGAGCAGCTGTATTGGGAGCTGAGCCAGCTGACCCAC  
rabbit -----

human AATATCACTGAGCTGGGCCCTATGCCCTGGACAACGACAGCCTCTTTGTCAATGGTTTC  
rabbit -----

human ACTCATCGGAGCTCTGTGTCCACCACCAGCACTCCTGGGACCCCCACAGTGTATCTGGGA  
rabbit -----

human GCATCTAAGACTCCAGCCTCGATATTTGGCCCTTCAGCTGCCAGCCATCTCCTGATACTA  
rabbit -----

human TTCACCCTCAACTTCACCATCACTAACCTGCGGTATGAGGAGAACATGTGGCCTGGCTCC  
rabbit -----

human AGGAAGTTCAACTACAGAGAGGGTCCTTCAGGGCCTGCTAAGGCCCTTGTTCAAGAAC  
rabbit -----

human ACCAGTGTGGCCCTCTGTACTCTGGCTGCAGGCTGACCTTGCTCAGGCCAGAGAAAGAT  
rabbit -CCAGTGTGGCACCTTCTACACTGGCTGCAGCCTGGCCGCTCTCAGCCTTGAGAAGGGA  
\*\*\*\*\* \* \* \*\* \*\*\*\*\* \*\* \* \*\*\*\*\* \* \*\*\*\*\* \*

human GGGGAAGCCACCGGAGTGGATGCCATCTGCACCCACCGCCCTGACCCACAGGCCCTGGG  
rabbit GGAGCAGCCACTGGTGTGAACCTTGTCTGCACCTTCCACTCTGACCCCTTAACCCCTGGA  
\*\* \* \*\*\*\*\* \*\* \*\* \* \*\*\*\*\* \*\* \* \*\*\*\*\* \* \*\*\*\*\*

human CTGGACAGAGAGCAGCTGTATTTGGAGCTGAGCCAGCTGACCCACAGCATCACTGAGCTG  
rabbit CTGCGCAGAGAGCAGCTGTACTGGGAGCTGAGCCGAGAGACCTATGGCATCACCCAGCTG  
\*\*\* \*\*\*\*\* \* \*\*\*\*\* \*\*\*\* \* \*\*\*\*\* \*\*\*\*\*

human GGCCCTACACACTGGACAGGGACAGTCTCTATGTCAATGGTTTCACCCATCGGAGCTCT  
rabbit GGCTCCTTTGCCCTGGACAGGGACAGTCTCTATGTCAATGATTACACCTATGGAGCCATG  
\*\*\* \*\* \* \*\*\*\*\*\*\*\*\*\* \*\*\*\*\* \*\* \*\*\*\* \*\* \* \*

human GTACCCACCACCAGCACCAGGGTGGTCAAGGAGGCCATTCACTGAACCTCACCATC  
rabbit GCCCAACTACCAGCACTGATGAGGTCAGTGAGGAGCCCTTCAGCTGAACCTCACCATC  
\* \*\* \* \*\*\*\*\* \* \* \*\*\*\*\* \*\*\*\*\* \*\*\*\*\* \*\*\*\*\*

human AACAACTGCGCTACATGGCGGACATGGGCCAACCCGGCTCCCTCAAGTTCAACATCACA  
rabbit AACAACTGCGCTACTCTGCCAACATGGGCCGCCCTGGCTCCCTCAAGTTCAACATCACA  
\*\*\*\*\* \*\* \*\*\*\*\* \*\* \*\*\*\*\*



human CTGATCTCCCTCAGGCCTGAGAAGGATGGGGCAGCCACTGGTGTGGACACCACCTGCACC  
rabbit CTGACCTCTCTCAGGTCTGAGCAGGACAGGGTGGGCACTAGCGTGGATGTCATCTGCACC  
\*\*\* \*\* \*\*\*\*\* \*\*\*\*\* \*\* \* \*\* \* \*\* \* \*\* \*\*\*\*\* \*\* \*\*\*\*\*

human TACCACCCTGACCCTGTGGGCCCGGGCTGGACATACAGCAGCTTTACTGGGAGCTGAGT  
rabbit TATCGCCCTGACCCACGCACCTGGTGTGGATGTGCAGCAGCTGTATGGAGAGCTGAGC  
\*\* \* \*\*\*\*\* \* \*\* \* \*\*\*\*\* \* \*\*\*\*\* \*\* \* \*\*\*\*\*

human CAGCTGACCCATGGTGTACCCAACTGGGCTTCTATGTCCTGGACAGGGATAGCCTCTTC  
rabbit CAGCTGACCCATGGTGTACCCAGTTGGCCTGTACAGCTTGGACAAGGACAGCCTATTT  
\*\*\*\*\*  
\*\*\*\*\* \* \*\* \* \*\*\*\*\* \*\* \*\*\*\*\* \*\*

human ATCAATGGCTATGCACCCAGAATTTATCA---ATCCGGGGCGAGTACCAGATAAATTC  
rabbit GTCAATGGCTATGCACCCAGCACGTGGCACCATCTGGAGCGAGTACCAGCTTGATTC  
\*\*\*\*\* \* \* \*\* \*\* \* \*\*\*\*\* \* \*\*\*\*\*

human CACATTGTCAACTGGAACCTCAGTAATCCAGACCCACATCCTCAGAGTACATCACCTG  
rabbit CACATAATCAACTGGAACCTCAGCAAGGCAGATCCCAGCTCTGTGGAGTACCTTGCTCTG  
\*\*\*\*\* \*\*\*\*\* \*\* \*\*\*\*\* \*\* \*\*\*\*\* \* \* \*\*

human CTGAGGGACATCCAGGACAAGGTCACCACACTCTACAAAGGCAGTCAACTACATGACACA  
rabbit ATGACGGACATCCAGGACAAGGTCACCAGACTCTACACAGGGAGTCAACTACGAGACGTG  
\*\*\* \*\*\*\*\* \*\*\*\*\* \*\*\*\*\* \*\*\*\*\* \*\*\*\*\* \*\*

human TTCCGCTTCTGCCTGGTCACCAACTTGACGATGGACTCCGTGTTGGTCACTGTCAAGGCA  
rabbit TTCAACTCATGCCTAGTCACCAACTTAACGTGGGCTCTCTGTTGGTCACTATGAAAGCA  
\*\* \* \*\*\*\*\* \*\*\*\*\* \*\* \* \*\* \*\*\*\*\* \* \*\* \*\*

human TTGTTCTCCTCCAATTTGGACCCAGCCTGGTGGAGCAAGTCTTTCTAGATAAGACCCTG  
rabbit CTGTTCTCCTCCAATCTGGACCCACCTGGTGAAGCAAGTTTTCTAGAAAAGACCTCG  
\*\*\*\*\* \*\*\*\*\* \*\*\*\*\* \*\*\*\*\* \*\*\*\*\* \*\*\*\*\* \*

human AATGCCTCATTCCATTGGCTGGGCTCCACCTACCAGTTGGTGGACATCCATGTGACAGAA  
rabbit AATGCCTCATCCTACTGGCTGGGCGCCACCTACCAGTTGATGGATCTGCATGTGACAGAA  
\*\*\*\*\* \* \* \*\*\*\*\* \*\*\*\*\* \*\*\*\*\* \*\*\*\*\* \* \*\*\*\*\*

human ATGGAGTCATCAGTTTATC-----AACCAACAAGCAGCTCCAGCACCCAGCAC  
rabbit GTGAGGCCAGCAGTTCATCTACCTACAGAAAAACCAACAAGAAGTCCCAGTCCCAGCAA  
\*\* \* \*\* \*\*\*\*\* \*\* \*\*\*\*\* \*\* \*\*\*\*\*

human TTCTACCTGAATTTACCATCACCAACCTACCATATCCCAGGACAAAGCCCAGCCAGGC  
rabbit TTCCAGCTGAATTTACCATCACCAACCTGTTCTACTCCCAAGACATAGCCCAGGAAGGC  
\*\*\* \* \*\*\*\*\* \*\*\*\*\* \*\* \*\*\*\*\* \*\* \*\*\*\*\*

human ACCACCAATTACCAGAGGAACAAAAGGAATATTGAGGATGCGCTCAACCAACTTTCCGA  
rabbit AGTGCCAAATACCAGTGGAACAAAAGAAGTATTGAGGACGCGCTCAACCAGCTTTCCAA  
\* \*\*\*\* \*\*\*\*\* \*\*\*\*\* \* \*\*\*\*\* \*\*\*\*\* \*\*\*\*\* \*

human AACAGCAGCATCAAGAGTATTTTTCTGACTGTCAAGTTTCAACATTCAGGTCTGTCCCC  
rabbit AACAGCAGCGTCAAGAGTACTTTTCCGAATGTCAAGTTGTAGCATTCCGGTCTGTCCCC  
\*\*\*\*\* \*\*\*\*\* \*\*\*\*\* \*\* \*\*\*\*\* \* \*\*\*\*\* \*\*\*\*\*

human AACAGGCACCACACCGGGTGGACTCCCTGTGTAACCTCTCGCCACTGGCTCGGAGAGTA  
rabbit GACAGCGACCATACCAAAGTGGACTCCTTGTGTGGCTTCTCATCTTTGGCTCGGAGACTG  
\*\*\* \*\* \* \*\*\*\*\* \*\*\*\*\* \*\*\*\*\* \* \*\*\*\*\* \*

human GACAGAGTTGCCATCTATGAGGAATTTCTGCGGATGACCCGGAATGGTACCCAGCTGCAG  
rabbit GACAGAGTCATTATCTATGAGGAGTTTGTGCAGATGACCAAGAATGGTACTCAGTTGCAG  
\*\*\*\*\* \*\*\*\*\* \*\*\*\*\* \*\* \*\*\*\*\* \*\*\*\*\* \*\* \*\*\*\*\*

human AACTTCACCCTGGACAGGAGCAGTGTCCCTTGTGGATGGGTATTCTCCAACAGAAATGAG  
rabbit AACTTCACCCTGGACAGGGACAGCATTCTTGTGGACGGGTATTCTCCAAGCAGAAATGAT  
\*\*\*\*\* \*\*\*\*\* \*\* \* \*\*\*\*\* \*\*\*\*\* \*\*\*\*\* \*

human CCCTTAACTGGGAATTCTGACCTTCCCTTCTGGGCTGTCATCCTCATCGGCTTGGCAGGA  
rabbit GCTGTGATTAGGAATTCAGACCTTCCCTTCTGGCCATCATCCTCATCTGCCTGGCTGCA  
\* \* \* \*\*\*\*\* \*\*\*\*\* \*\*\*\*\* \*\*\*\*\* \*\* \*\*\*\*\* \*

human CTCCTGGGAGTCATCACATGCCTGATCTGCGGTGTCTGGTGACCACCCGCCGGCGGAAG  
rabbit TTCCTGGGACTCATCACGTGCCTGGTCTGCTGCTTTCTGGTGGCCACCCGCCTGCGGAGG  
\*\*\*\*\* \*\*\*\*\* \*\*\*\*\* \*\*\*\*\* \* \* \*\*\*\*\* \*\*\*\*\* \*\*\*\*\* \*

human AAGGAAGGAGAATACAACGTCCAGCAACAGTGCCCAGGCTACTACCAGTCACACCTAGAC  
rabbit AAGGAGGGAGACTACGAGGTCCAACGCCGCCCTGGGCTACTATCTGCCACAGCTGGAC  
\*\*\*\*\* \*\*\*\*\* \*\* \* \*\*\*\*\* \* \* \*\*\* \*\*\*\*\* \* \* \*\*\*\* \*\* \*\*\*

human CTGGAGGATCTGCAATGA---CTGGAACCTGCCGG---TGCCTGGGGTGCCTTTCCCCA  
rabbit CTGACGAAGCTGCAGTAATTCCTGGAACCACAGGAGCTTGGCTGGAGCAGAAATAAACCA  
\*\*\* \* \* \*\*\*\*\* \* \* \*\*\*\*\* \* \*\* \*\*\*\*\* \* \* \*\*\*\*

human GCCAGGGTCCAAAGAAGCTT--GGCTGGGGCAGAAATAAACCAT-ATTGGTCGGA-----  
rabbit CACTGGTGCACACAGCCTCTGGGCCCTTCTTGACTTGGCCCCTGACTGGCTTGCAGAGA  
\* \*\* \* \* \* \* \*\* \*\*\* \*\* \* \*\* \* \* \*\*\*\* \*

human -----  
rabbit CTACGAGGAAAGTTGAAAGCCTTCCTTCCTTACTAAGCCCTGAAGTCAACTATCAGTTG

human -----  
rabbit TGTTTTATGGTTTCACACCATGTCACCCTCAGGGATGCCAGGATTGCCATCACATAAAA

human -----  
rabbit TCAACATCCCCTTACCATGAGGTTTTCCCTCCTGTTCACCCACTGTATACCTGCTATT

human -----  
rabbit CTCCCATCACACCTATGTCTGCTCCTCCCATTCCCTACTTCCTGTAGTCCCCTAGT

human -----  
rabbit CTTGAGTTTGTCTTCCTTCATTCTCTGAAGCTCAGGTTACCAGGATTTCTGGATCAGTT

human -----  
rabbit TTCCTGGATGTCTCCTTACCCACCCCATGGATTCTCCAAGATGAAAAACAGACCAAGAA

human -----  
rabbit GTGGCTCAAAAATGGCTCTGTAATCAGCTTTGGGACTGGAGAGCTGAAATGAAGAGAGGC

human -----  
rabbit ATTAGGAAGCCAAGTAATATCAAGATTCTAGAAGCATAATGTCTGCTTTGGATATAAAG

human -----  
rabbit ATGAATAAAAGT

Underline fields are primer sequences we used.

Supplemental Information 5.

CLUSTAL 2.1 multiple sequence alignment

Galectin 3

```
human      GAGTATTTGAGGCTCGGAGCCACCGCCCCCGCGGCCCGCAGCACCTCCTCGCCAGCAG
rabbit     -----

human      CCGTCCGGAGCCAGCCAACGAGCGGAAAATGGCAGACAATTTTCGCTCCATGATGCGTT
rabbit     -----AGGAAAATGGCGGATGGTTTTTCGCTCAACGATGCCCT
                ***** **      ***** * ***** *

human      ATCTGGGTCTGGAAACCCAAACCTCAAGGATGGCCTGGCGCATGGGGGAACCAGCCTGC
rabbit     ATCTGGGTCTGGACACCCCCAAACCAAGGATGGCCTGGCCCATGGGGGAACCAGCCTGC
                ***** ****      *****

human      TGGGGCAGGGGGCTACCCAGGGGCTTCTATCCTGGGGCTACCCGGGCAGGCACCCC
rabbit     TGGGCCAGGGGGCTACCCAGGGCAGCCTATCCTGGGGCTACCCTGGACATGCACCT--
                *** *****

human      AGGGGCTTATCCTGGACAGGCACCTCCAGGCGCCTACCCTGGAGCACCTGGAGCTTATCC
rabbit     -GGAGCTTATCCCGGGAAGCGCCTCCTGGCCCCTACCCTGG-----CC
                * ***** ** * * * ***** ** *****

human      CGGAGCACCTGCACCTGGAGTCTACCCAGGGCCACCCAGCGGCCCTGGGGCCTACCCATC
rabbit     CAGGA-----GCACATGGAGCCTACCCTGGGCAGCCAGGTGGTCTGGGGCCTACCCGTC
                * *      **** ***** ***** ***** * * * *****

human      TTCTGGACAGCCAAGTGCCACCGGAGCCTACCCTGCCACTGGCCCCTATGGCGCCCTGC
rabbit     TCCTGGACAGCCAAGTGGTGTGCTGGAGCTTACCCTGGCGCCAGCCCTTACAGCGCCTCTGC
                * ***** * ***** * * ***** ** *****

human      TGGGCCACTGATTGTGCCTTATAACCTGCCTTTGCCTGGGGGAGTGGTGCCTCGCATGCT
rabbit     TGGACCACTGCCTGTGCCTTATGACCTGCCTCTGCCTGGAGGAGTCATGCCCCGCATGCT
```



\*\*\* \*\*\*\*\* \*\*\*\*\* \*\*\*\*\* \*\*\*\*\* \*\*\*\*\* \*\*\*\*\* \*\*\*\*\* \*\*\*\*\*

human GATAACAATTCTGGGCACGGTGAAGCCCAATGCAAACAGAATTGCTTTAGATTTCCAAAG  
rabbit GATAACGATTGTGGGCACGGTGAAGCCCAATGCAAACAGACTCGCTTTGGATTCAAGAG

\*\*\*\*\* \*\* \*\*\*\*\* \*\*\*\*\* \* \*\*\*\*\* \*\*\*\*\* \* \*\*

human AGGGAATGATGTTGCCTTCCACTTTAACCACGCTTCAATGAGAACAACAGGAGAGTCAT  
rabbit AGGGAATGACGTTGCCTTCCACTTTAACCCCCGCTTCAATGAGAACAACAGGAGAGTCAT

\*\*\*\*\* \*\*\*\*\* \*\*\*\*\* \*\*\*\*\* \*\*\*\*\* \*\*\*\*\* \*\*\*\*\* \*\*\*\*\*

human TGTTTGAATACAAAGCTGGATAATAACTGGGGAAGGGAAGAAAGACAGTCGGTTTTCCC  
rabbit TGCTGCAACACAAAGGTGGATAACAACCTGGGGAAGGGAAGAAAGGCAGACGACTTTCCC

\*\*\* \*\*\*\*\* \*\*\*\*\* \*\*\*\*\* \*\*\*\*\* \*\*\*\*\* \*\*\*\*\* \*\*\*\*\* \*\* \*\*\*\*\*

human ATTTGAAAGTGGGAAACCATTCAAATACAAGTACTGGTTGAACCTGACCACTTCAAGGT  
rabbit ATTTGAAATTGGTAAACCATTCAAATACAAGTCTGGTGGAGCCAGACCACTTCAAGGT

\*\*\*\*\* \*\* \*\*\*\*\* \*\*\*\*\* \*\*\*\*\* \*\*\*\*\* \*\*\*\*\* \*\*\*\*\* \*\*\*\*\*

human TGCAGTGAATGATGCTCACTTGTTGCAGTACAATCATCGGGTTAAAAACTCAATGAAAT  
rabbit TGCGGTCAATGATGCCACTTGTTGCAGTACAATCATCGCATGAGAAACCTCAAGGAAAT

\*\*\* \*\* \*\*\*\*\* \*\*\*\*\* \*\*\*\*\* \*\*\*\*\* \* \* \*\*\* \*\*\*\*\* \*\*\*\*\*

human CAGCAAAGCTGGGAATTTCTGGTGACATAGACCTCACCAGTGCTTCATATACCATGATATA  
rabbit CAACAAGCTGGGAATTTCTGGTGACATACAACCTCACCAGTGCTTCACATGCTATGATATA

\*\* \*\*\* \*\*\*\*\* \*\*\*\*\* \* \*\*\*\*\* \*\*\*\*\* \*\* \* \*\*\*\*\*

human ATCTGAAAGGGCAGATTAATAAAAAAAAAAAGAATCTAAACCTTACATGTGTAAGGTTT  
rabbit A-----

\*

human CATGTTCACTGTGAGTGAAAATTTTACATTCATCAATATCCCTCTTGTAAGTCATCTAC  
rabbit -----

human TTAATAAATATTACAGTGAATTACCTGTCTCAATATGTCAAAAAAAAAAAAAAAAAA  
rabbit -----

Underline fields are primer sequences we used.
